# Supplementary material for: The Bibliometric Analysis of EEGLAB Software in the Web of Science Indexed Articles
Source: Preprints.org preprint supplement (doi:10.20944/preprints202310.0940.v1), 2023-10-16
Supplement: Supplementary file 1 [file supplementary]

Appendix
Further Analysis

Contents

[General Information 4](#_Toc144653999)

[Descriptive 4](#_Toc144654000)

[Annual Scientific Production 5](#_Toc144654001)

[Average Citations Per Year 6](#_Toc144654002)

[Three Field Plot 7](#_Toc144654003)

[Sources 8](#_Toc144654004)

[Most Relevant Sources 8](#_Toc144654005)

[Most Local Cited Sources 9](#_Toc144654006)

[Core Sources by Bradford’s Law 10](#_Toc144654007)

[Sources Local Impact by G-Index 11](#_Toc144654008)

[Sources Local Impact by H-Index 12](#_Toc144654009)

[Sources Local Impact by M-Index 13](#_Toc144654010)

[Sources Local Impact by Total Citations 14](#_Toc144654011)

[Local Impacts 14](#_Toc144654012)

[Sources’ Production Over time 15](#_Toc144654013)

[Authors 16](#_Toc144654014)

[Most Local Cited Authors 16](#_Toc144654015)

[Author Productivity through Lotka’s Law 16](#_Toc144654016)

[Author’s Local Impact by H index 18](#_Toc144654017)

[Author’s Local Impact by G index 19](#_Toc144654018)

[Author’s Local Impact by M index 20](#_Toc144654019)

[Author’s Local Impact by Total Citations 21](#_Toc144654020)

[Documents 22](#_Toc144654021)

[Most Global Cited Documents 22](#_Toc144654022)

[Most Local Cited Documents 23](#_Toc144654023)

[Most Local Cited References 24](#_Toc144654024)

[Most Relevant Keywords Plus 25](#_Toc144654025)

[Most Relevant Authors Keywords 27](#_Toc144654026)

[Most Relevant Unigram words in Title 29](#_Toc144654027)

[Most Relevant Bigram words in Title 31](#_Toc144654028)

[Most Relevant Trigram words in Title 33](#_Toc144654029)

[Most Relevant Unigram words in Abstract 35](#_Toc144654030)

[Most Relevant Bigram words in Abstract 37](#_Toc144654031)

[Most Relevant Trigram words in Abstract 39](#_Toc144654032)

[Trend Topic of Author Keywords 42](#_Toc144654033)

[Conceptual Structure 43](#_Toc144654034)

[Co-Occurrence Network of Keyword Plus 43](#_Toc144654035)

[Co-Occurrence Network of Author Keyword 44](#_Toc144654036)

[Co-Occurrence Network of Unigram words in Title 44](#_Toc144654037)

[Co-Occurrence Network of Bigram words in Title 45](#_Toc144654038)

[Co-Occurrence Network of Trigram words in Title 45](#_Toc144654039)

[Co-Occurrence Network of Unigram words in Abstract 46](#_Toc144654040)

[Co-Occurrence Network of Bigram words in Abstract 46](#_Toc144654041)

[Co-Occurrence Network of Trigram words in Abstract 47](#_Toc144654042)

[Thematic Map 48](#_Toc144654043)

[Thematic Map Keyword Plus 48](#_Toc144654044)

[Thematic Network Keyword Plus 48](#_Toc144654045)

[Thematic Map Authors Keyword 49](#_Toc144654046)

[Thematic Network Authors Keyword 49](#_Toc144654047)

[Thematic Map Unigram Word in title 50](#_Toc144654048)

[Thematic Network Unigram Word in title 50](#_Toc144654049)

[Thematic Map Bigram Word in title 51](#_Toc144654050)

[Thematic Network Bigram Word in title 51](#_Toc144654051)

[Thematic Map Trigram Word in title 52](#_Toc144654052)

[Thematic Network Trigram Word in title 52](#_Toc144654053)

[Thematic Map Unigram Word in Abstract 53](#_Toc144654054)

[Thematic Network Unigram Word in Abstract 53](#_Toc144654055)

[Thematic Map Bigram Word in Abstract 54](#_Toc144654056)

[Thematic Network Bigram Word in Abstract 54](#_Toc144654057)

[Thematic Map Trigram Word in Abstract 55](#_Toc144654058)

[Thematic Network Trigram Word in Abstract 55](#_Toc144654059)

[Correspondence Analysis 56](#_Toc144654060)

[Multiple Correspondence Analysis of Keyword Plus 56](#_Toc144654061)

[Correspondence Analysis of Keyword Plus 57](#_Toc144654062)

[Multiple Correspondence Analysis of Authors Keywords 58](#_Toc144654063)

[Correspondence Analysis of Authors Keywords 59](#_Toc144654064)

[Co-citation Network 60](#_Toc144654065)

[Co-Citation Network for Research Articles 60](#_Toc144654066)

[Co-Citation Network for Authors 62](#_Toc144654067)

[Co-Citation Network for Sources 64](#_Toc144654068)

[Historiograph 66](#_Toc144654069)

[Collaboration Network 67](#_Toc144654070)

[University 67](#_Toc144654071)

[Countries 69](#_Toc144654072)

[Countries Collaboration Network 71](#_Toc144654073)

# General Information

## Descriptive

| **MAIN INFORMATION ABOUT DATA** | |
| --- | --- |
| **Timespan** | 2004:2023 |
| **Sources (Journals, Books, etc)** | 1,125 |
| **Documents** | 12,700 |
| **Annual Growth Rate %** | 28.12 |
| **Document Average Age** | 5.03 |
| **Average citations per doc** | 22.51 |
| **References** | 279,617 |

| **DOCUMENT CONTENTS** | |
| --- | --- |
| **Keywords Plus (ID)** | 13,707 |
| **Author's Keywords (DE)** | 19,062 |

| **AUTHORS** | |
| --- | --- |
| **Authors** | 29,125 |
| **Authors of single-authored docs** | 111 |

| **AUTHORS COLLABORATION** | |
| --- | --- |
| **Single-authored docs** | 148 |
| **Co-Authors per Doc** | 4.89 |
| **International co-authorships %** | 37.27 |

| **DOCUMENT TYPES** | |
| --- | --- |
| **article** | 12,165 |
| **article; book chapter** | 2 |
| **article; data paper** | 40 |
| **article; early access** | 222 |
| **article; proceedings paper** | 79 |
| **article; retracted publication** | 3 |
| **correction** | 1 |
| **editorial material** | 10 |
| **editorial material; book chapter** | 1 |
| **letter** | 8 |
| **letter; early access** | 1 |
| **meeting abstract** | 6 |
| **review** | 155 |
| **review; book chapter** | 7 |

## Annual Scientific Production

| **Year** | **Articles** |
| --- | --- |
| **2004** | 10 |
| **2005** | 36 |
| **2006** | 69 |
| **2007** | 112 |
| **2008** | 119 |
| **2009** | 186 |
| **2010** | 251 |
| **2011** | 296 |
| **2012** | 370 |
| **2013** | 484 |
| **2014** | 555 |
| **2015** | 675 |
| **2016** | 775 |
| **2017** | 872 |
| **2018** | 1,047 |
| **2019** | 1,223 |
| **2020** | 1,368 |
| **2021** | 1,536 |
| **2022** | 1,607 |
| **2023** | 1,109 |


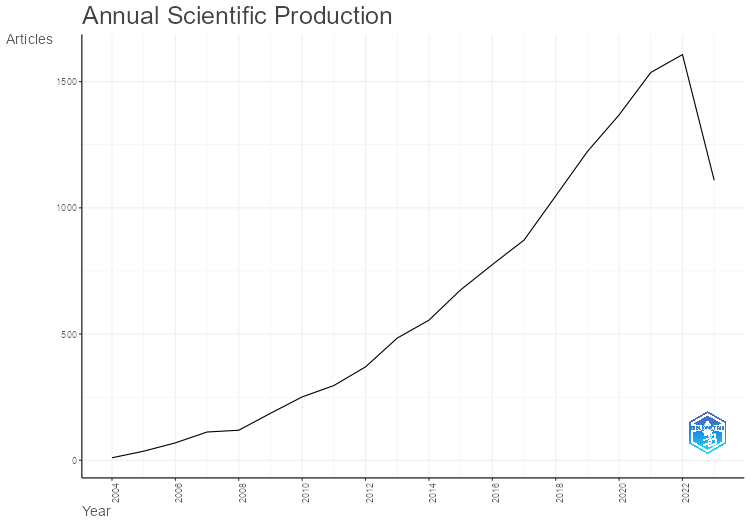


## Average Citations Per Year

| **Year** | **MeanTCperArt** | **N** | **MeanTCperYear** | **CitableYears** |
| --- | --- | --- | --- | --- |
| **2004** | 163.9 | 10 | 8.2 | 20 |
| **2005** | 139.33 | 36 | 7.33 | 19 |
| **2006** | 90.17 | 69 | 5.01 | 18 |
| **2007** | 87.99 | 112 | 5.18 | 17 |
| **2008** | 68.96 | 119 | 4.31 | 16 |
| **2009** | 71.96 | 186 | 4.8 | 15 |
| **2010** | 70.38 | 251 | 5.03 | 14 |
| **2011** | 91.74 | 296 | 7.06 | 13 |
| **2012** | 48.06 | 370 | 4 | 12 |
| **2013** | 42.54 | 484 | 3.87 | 11 |
| **2014** | 40.64 | 555 | 4.06 | 10 |
| **2015** | 33.34 | 675 | 3.7 | 9 |
| **2016** | 26.62 | 775 | 3.33 | 8 |
| **2017** | 25.59 | 872 | 3.66 | 7 |
| **2018** | 21.26 | 1047 | 3.54 | 6 |
| **2019** | 16.81 | 1223 | 3.36 | 5 |
| **2020** | 10.21 | 1368 | 2.55 | 4 |
| **2021** | 5.94 | 1536 | 1.98 | 3 |
| **2022** | 2.49 | 1607 | 1.25 | 2 |
| **2023** | 0.43 | 1109 | 0.43 | 1 |


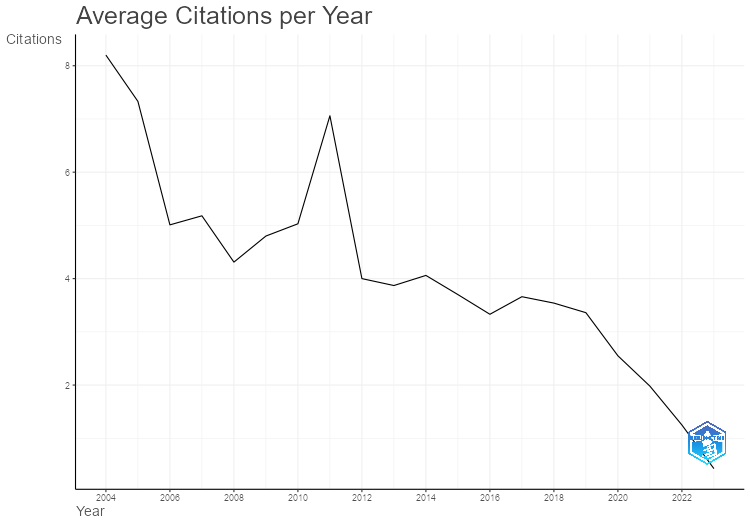


## Three Field Plot


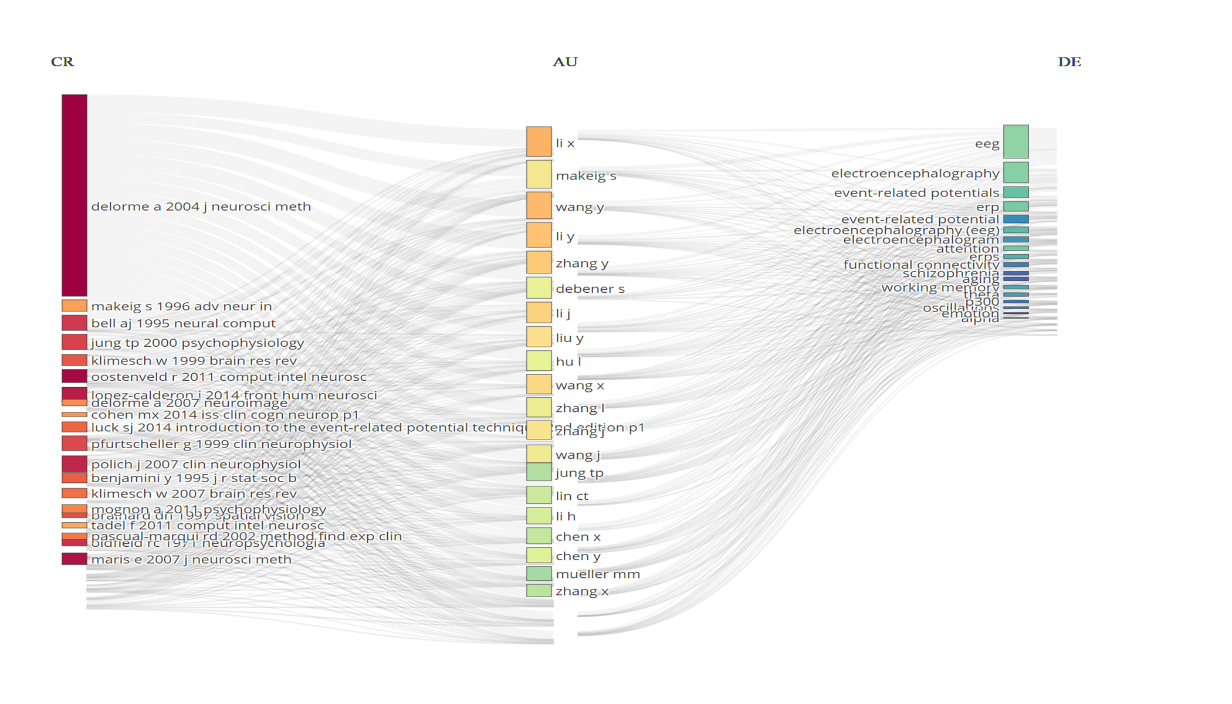


| **References** | |
| --- | --- |
| **Left** | References |
| **Middle** | Authors |
| **Right** | Keyword |

# Sources

## Most Relevant Sources


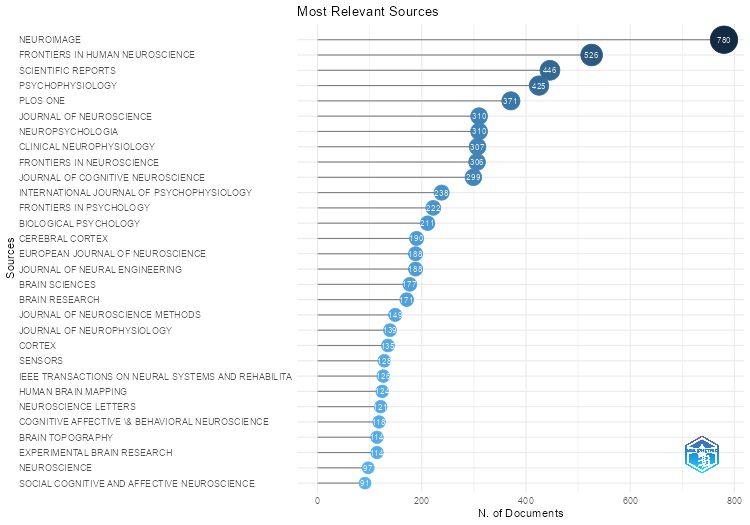


## Most Local Cited Sources


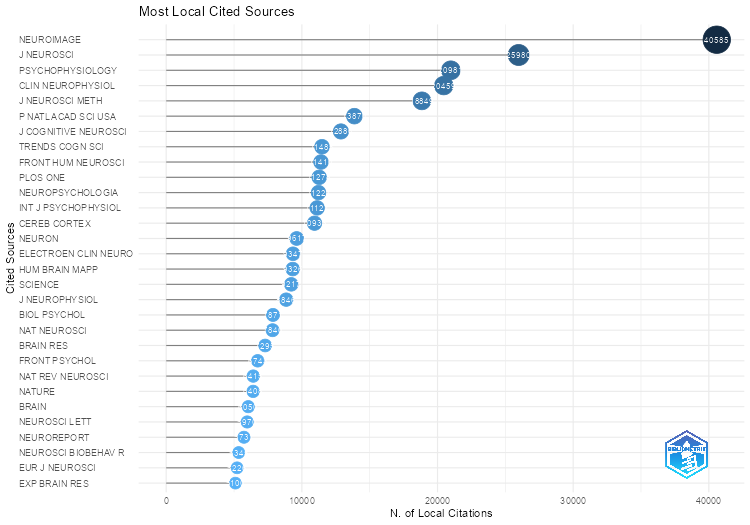


## Core Sources by Bradford’s Law


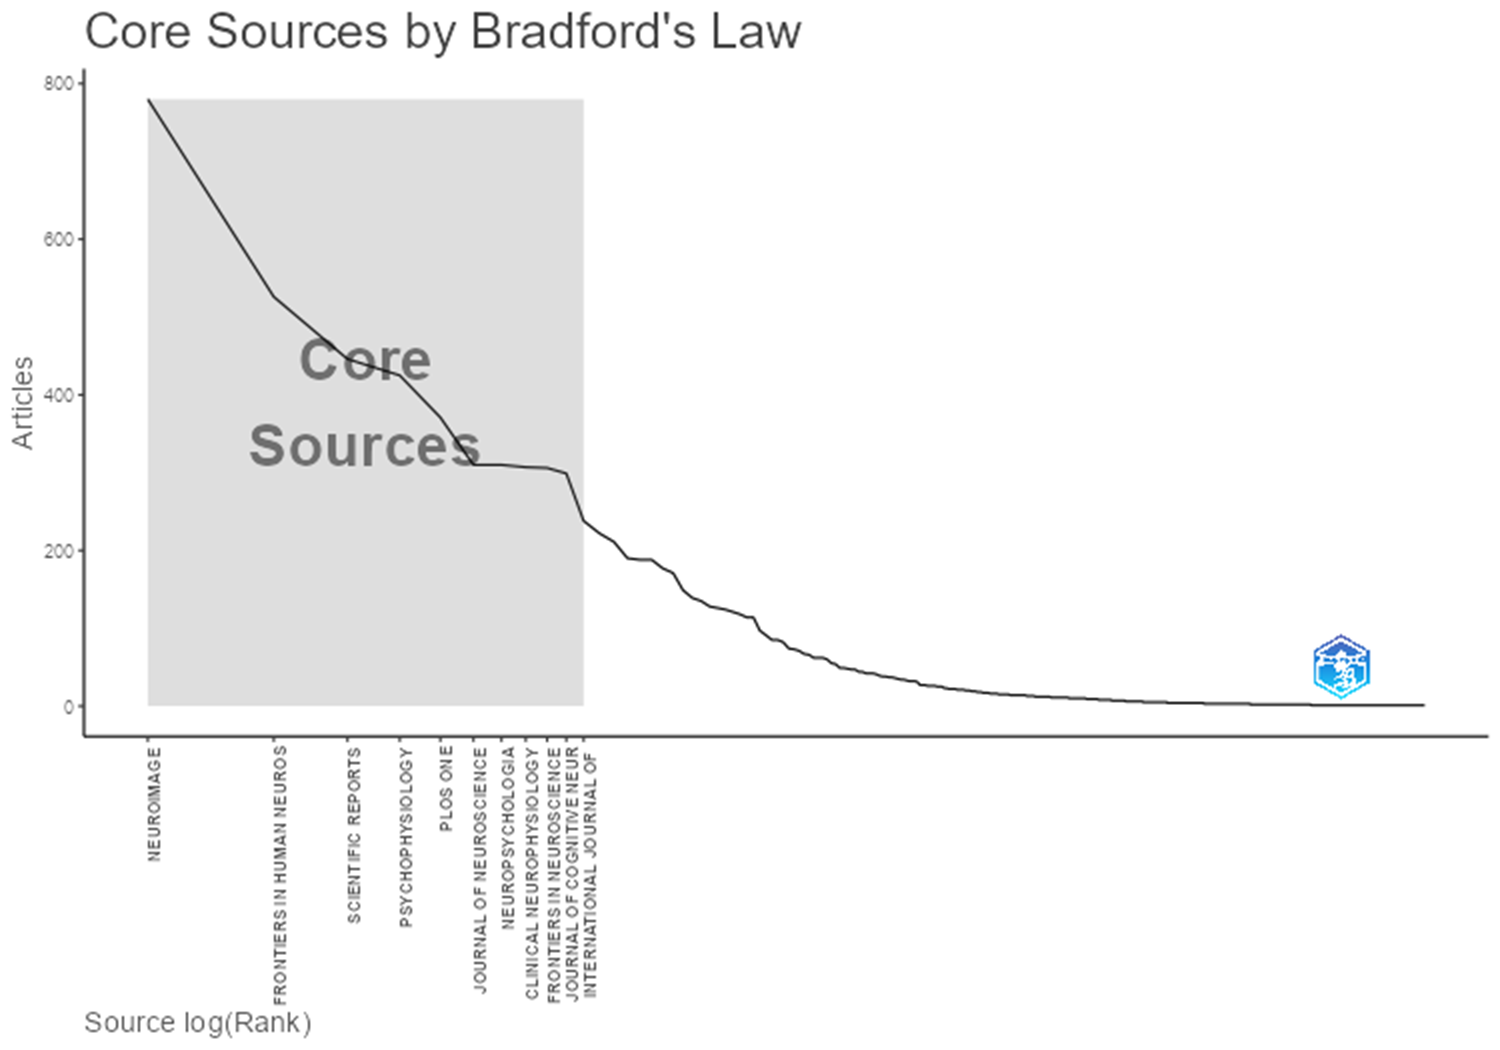


## Sources Local Impact by G-Index


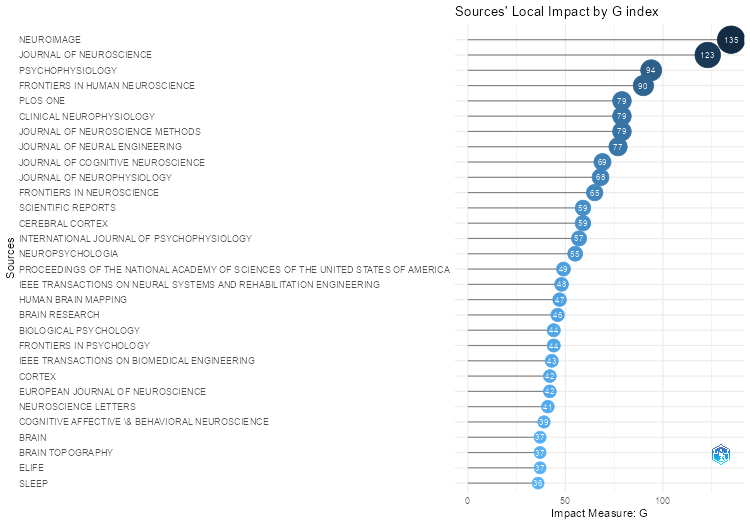


## Sources Local Impact by H-Index


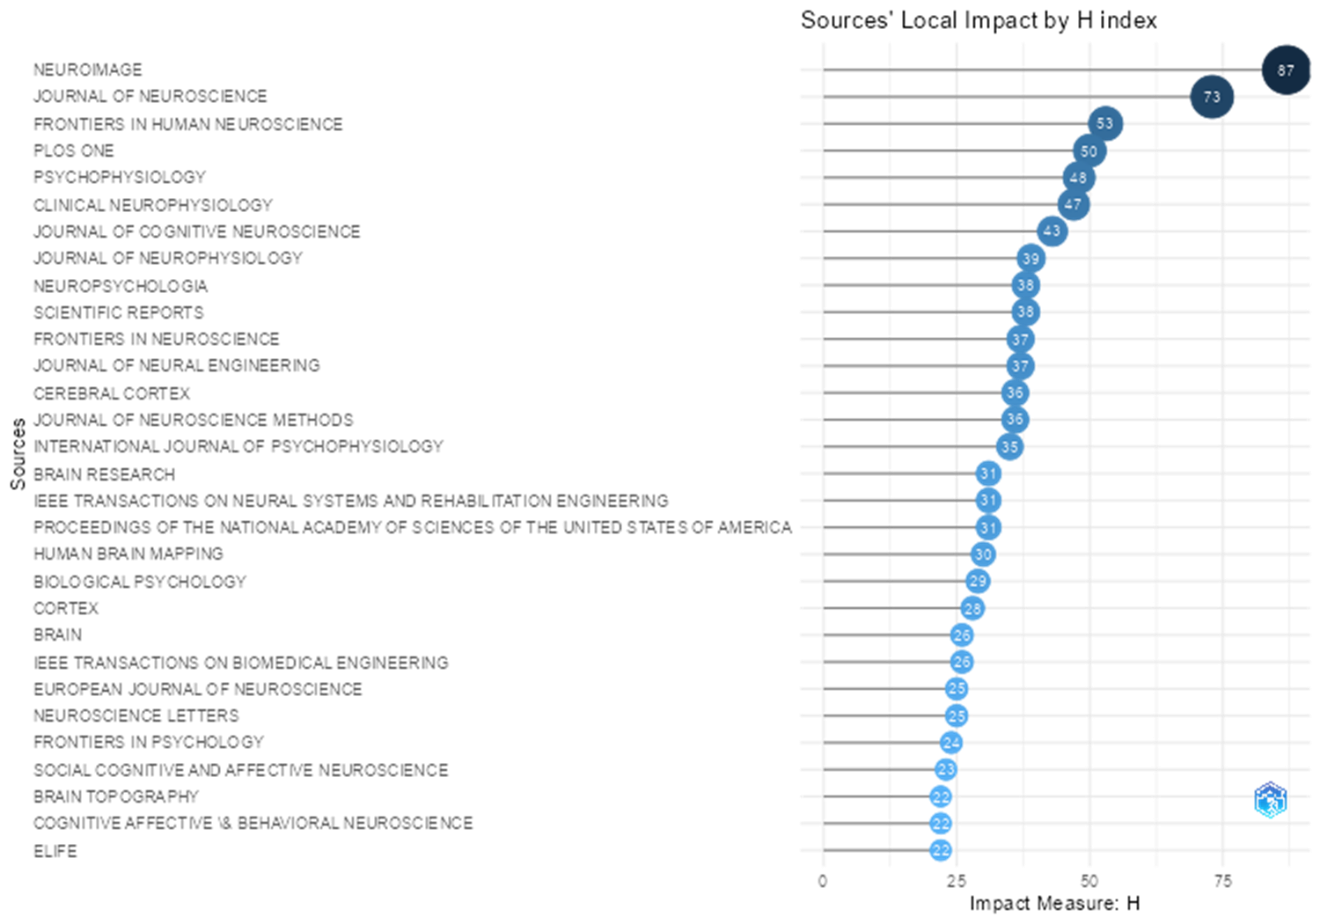


## Sources Local Impact by M-Index


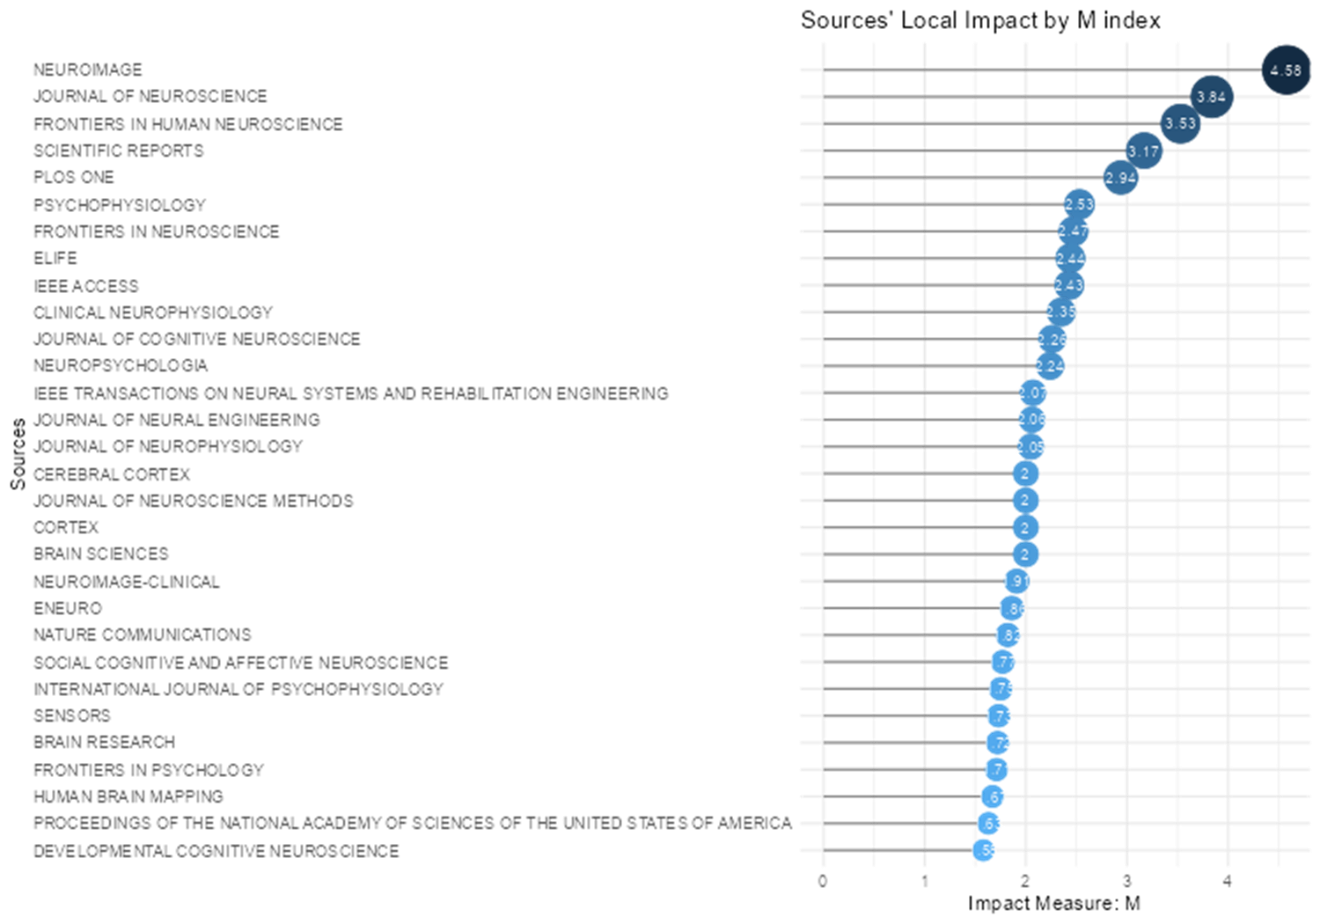


## Sources Local Impact by Total Citations


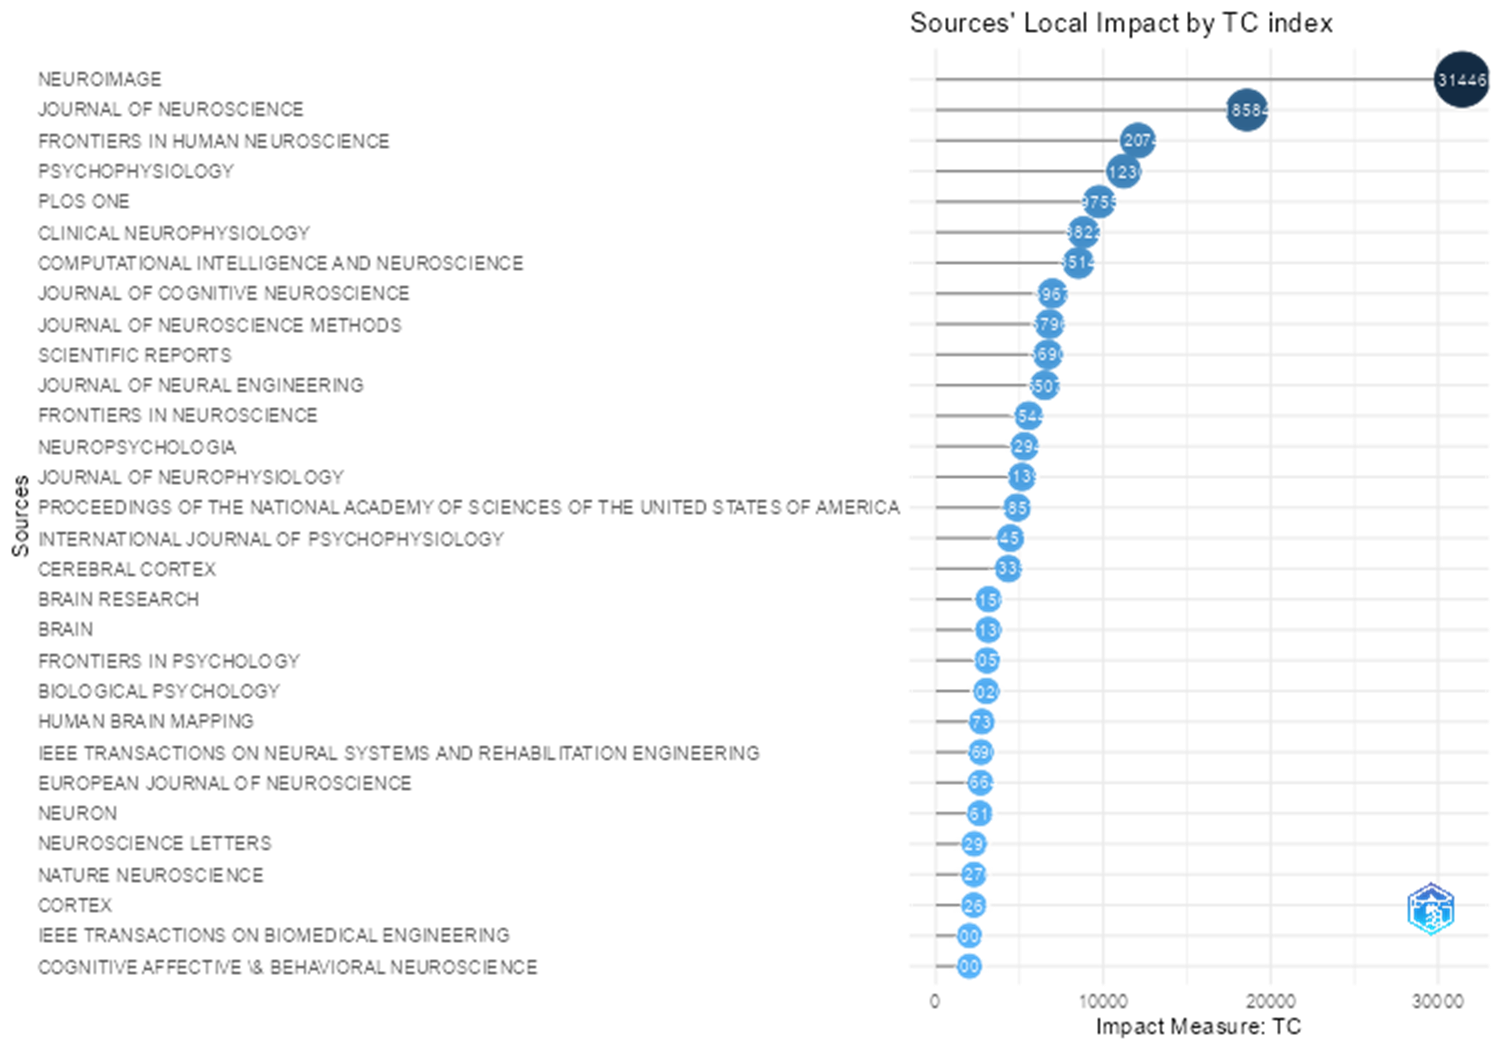


## Local Impacts

| **Sources** | **Local Impact** | | | | **Number Papers** | **Start Year** |
| --- | --- | --- | --- | --- | --- | --- |
| **H Index** | **G Index** | **M Index** | **Total Citations** |
| **NEUROIMAGE** | 87 | 135 | 4.578947 | 31446 | 780 | 2005 |
| **JOURNAL OF NEUROSCIENCE** | 73 | 123 | 3.842105 | 18584 | 310 | 2005 |
| **FRONTIERS IN HUMAN NEUROSCIENCE** | 53 | 90 | 3.533333 | 12074 | 526 | 2009 |
| **PLOS ONE** | 50 | 79 | 2.941176 | 9755 | 371 | 2007 |
| **PSYCHOPHYSIOLOGY** | 48 | 94 | 2.526316 | 11230 | 425 | 2005 |

## Sources’ Production Over time

It shows top 20 journals and 10 top journal in the table.


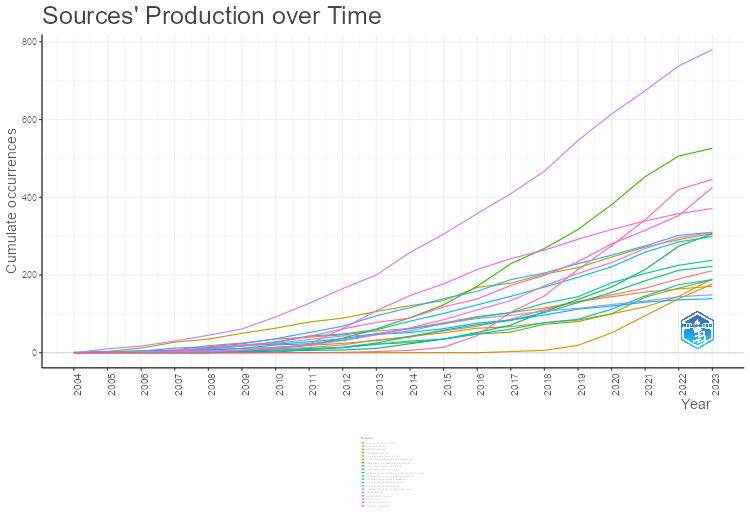


| **Year** | **Journal Names** | | | | | | | | | |
| --- | --- | --- | --- | --- | --- | --- | --- | --- | --- | --- |
| **NEUROIMAGE** | **FRONTIERS IN HUMAN NEUROSCIENCE** | **SCIENTIFIC REPORTS** | **PSYCHOPHYSIOLOGY** | **PLOS ONE** | **JOURNAL OF NEUROSCIENCE** | **NEUROPSYCHOLOGIA** | **CLINICAL NEUROPHYSIOLOGY** | **FRONTIERS IN NEUROSCIENCE** | **JOURNAL OF COGNITIVE NEUROSCIENCE** |
| **2004** | 0 | 0 | 0 | 0 | 0 | 0 | 0 | 1 | 0 | 0 |
| **2005** | 10 | 0 | 0 | 1 | 0 | 3 | 0 | 3 | 0 | 1 |
| **2006** | 17 | 0 | 0 | 1 | 0 | 4 | 0 | 12 | 0 | 2 |
| **2007** | 30 | 0 | 0 | 5 | 1 | 12 | 2 | 27 | 0 | 5 |
| **2008** | 45 | 0 | 0 | 12 | 4 | 15 | 2 | 35 | 0 | 9 |
| **2009** | 61 | 4 | 0 | 20 | 7 | 23 | 6 | 50 | 2 | 17 |
| **2010** | 92 | 11 | 0 | 26 | 10 | 36 | 14 | 63 | 4 | 28 |
| **2011** | 127 | 19 | 0 | 42 | 22 | 52 | 20 | 79 | 6 | 43 |
| **2012** | 165 | 37 | 1 | 61 | 62 | 68 | 31 | 89 | 7 | 48 |
| **2013** | 200 | 61 | 3 | 78 | 108 | 95 | 46 | 106 | 11 | 59 |
| **2014** | 258 | 90 | 6 | 89 | 147 | 116 | 64 | 121 | 23 | 81 |
| **2015** | 305 | 123 | 14 | 118 | 177 | 139 | 85 | 134 | 35 | 101 |
| **2016** | 358 | 171 | 44 | 138 | 214 | 158 | 110 | 168 | 52 | 123 |
| **2017** | 409 | 229 | 104 | 173 | 242 | 188 | 134 | 179 | 71 | 145 |
| **2018** | 467 | 268 | 146 | 199 | 264 | 205 | 172 | 202 | 106 | 169 |
| **2019** | 546 | 317 | 214 | 234 | 292 | 229 | 204 | 219 | 137 | 194 |
| **2020** | 614 | 381 | 275 | 280 | 317 | 251 | 232 | 246 | 169 | 221 |
| **2021** | 674 | 453 | 342 | 315 | 339 | 275 | 268 | 272 | 214 | 259 |
| **2022** | 738 | 506 | 420 | 353 | 358 | 302 | 296 | 291 | 274 | 285 |
| **2023** | 780 | 526 | 446 | 425 | 371 | 310 | 310 | 307 | 306 | 299 |

# Authors

## Most Local Cited Authors

| **Row** | **Author** | **University** | **LocalCitations** |
| --- | --- | --- | --- |
| 1 | Scott Makeig | University of California, San Diego | 3,427 |
| 2 | Arnaud Delorme | CNRS, UCSD, Paul Sabatier university | 2,151 |
| 3 | Stefan Debener | University of Oldenburg | 1,870 |
| 4 | Steven J Luck | University of California, Davis | 1,670 |
| 5 | Javier Lopez-Calderon | Universidad de Talca, United States | 1,228 |
| 6 | Julie Onton | University of Califormia, San Diego | 1,064 |
| 7 | Mike X Cohen | Radboud University Medical Centre | 788 |
| 8 | Daniel P. Ferris | University of Florida | 786 |
| 9 | Klaus Gramann | Technische Universität Berlin | 672 |
| 10 | Giandomenico (GD) Iannetti | University College London (UCL) | 667 |

## Author Productivity through Lotka’s Law

| **N.Articles** | **N.Authors** | **Freq** |
| --- | --- | --- |
| **1** | 19,416 | 66.7% |
| **2** | 4,432 | 15.2% |
| **3** | 1,879 | 6.5% |
| **4** | 1,000 | 3.4% |
| **5** | 580 | 2.0% |
| **6** | 402 | 1.4% |
| **7** | 292 | 1.0% |
| **8** | 230 | 0.8% |
| **9** | 175 | 0.6% |
| **10** | 124 | 0.4% |


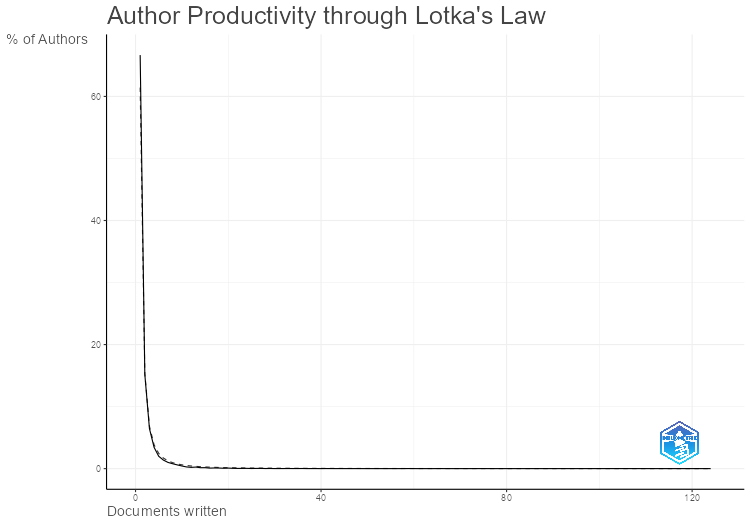


## Author’s Local Impact by H index


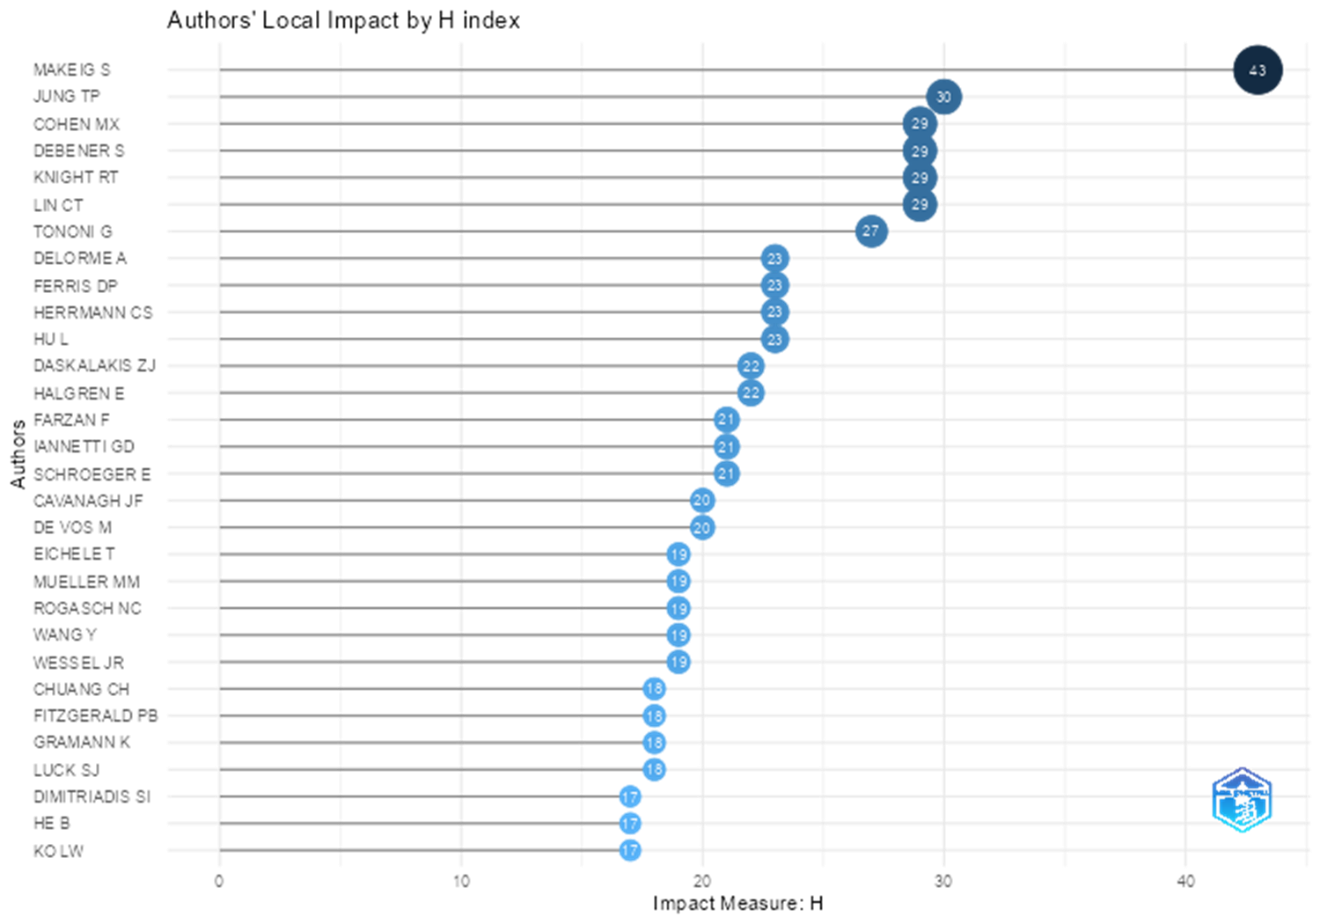


## Author’s Local Impact by G index


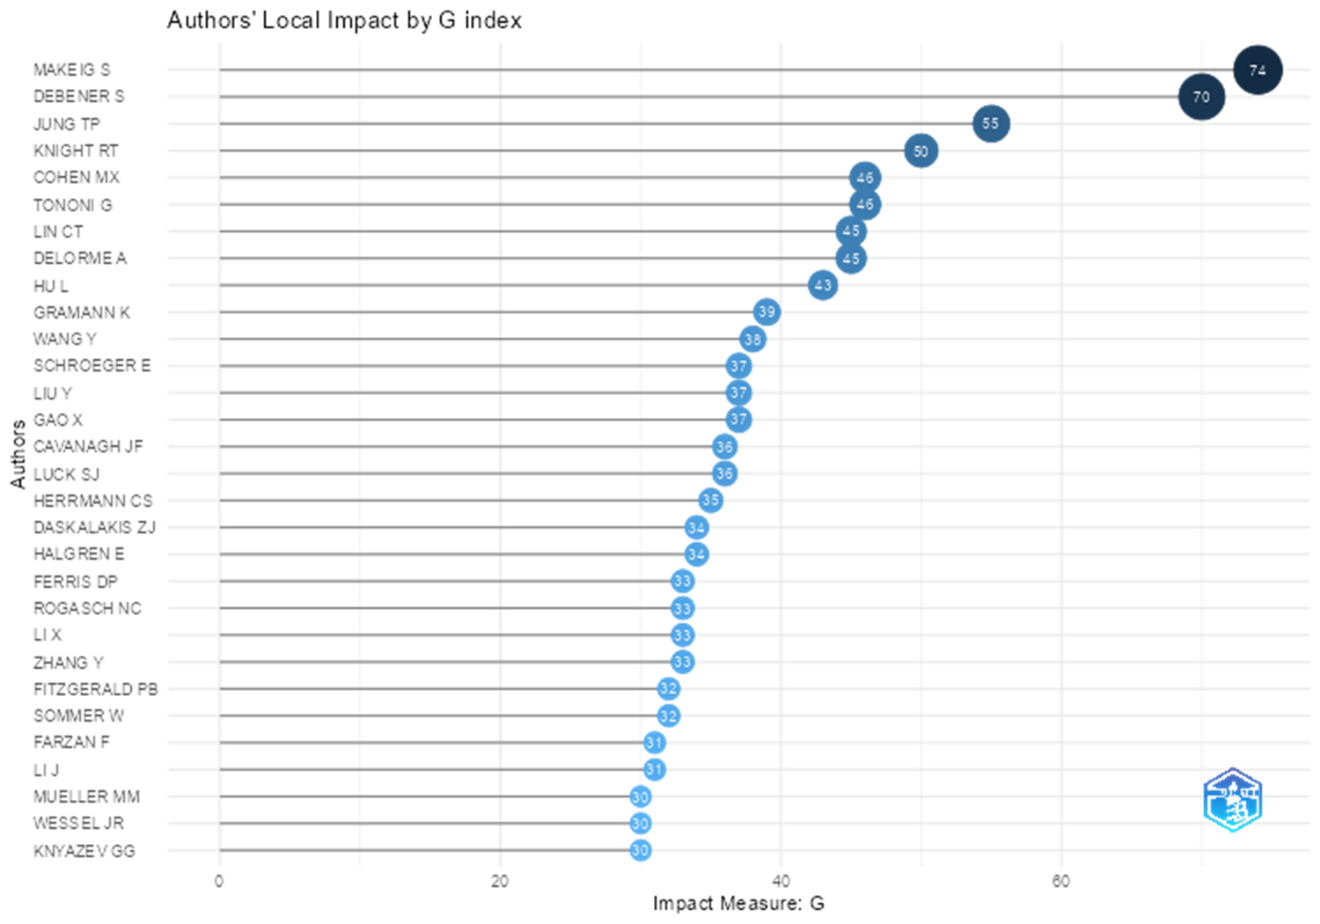


## Author’s Local Impact by M index


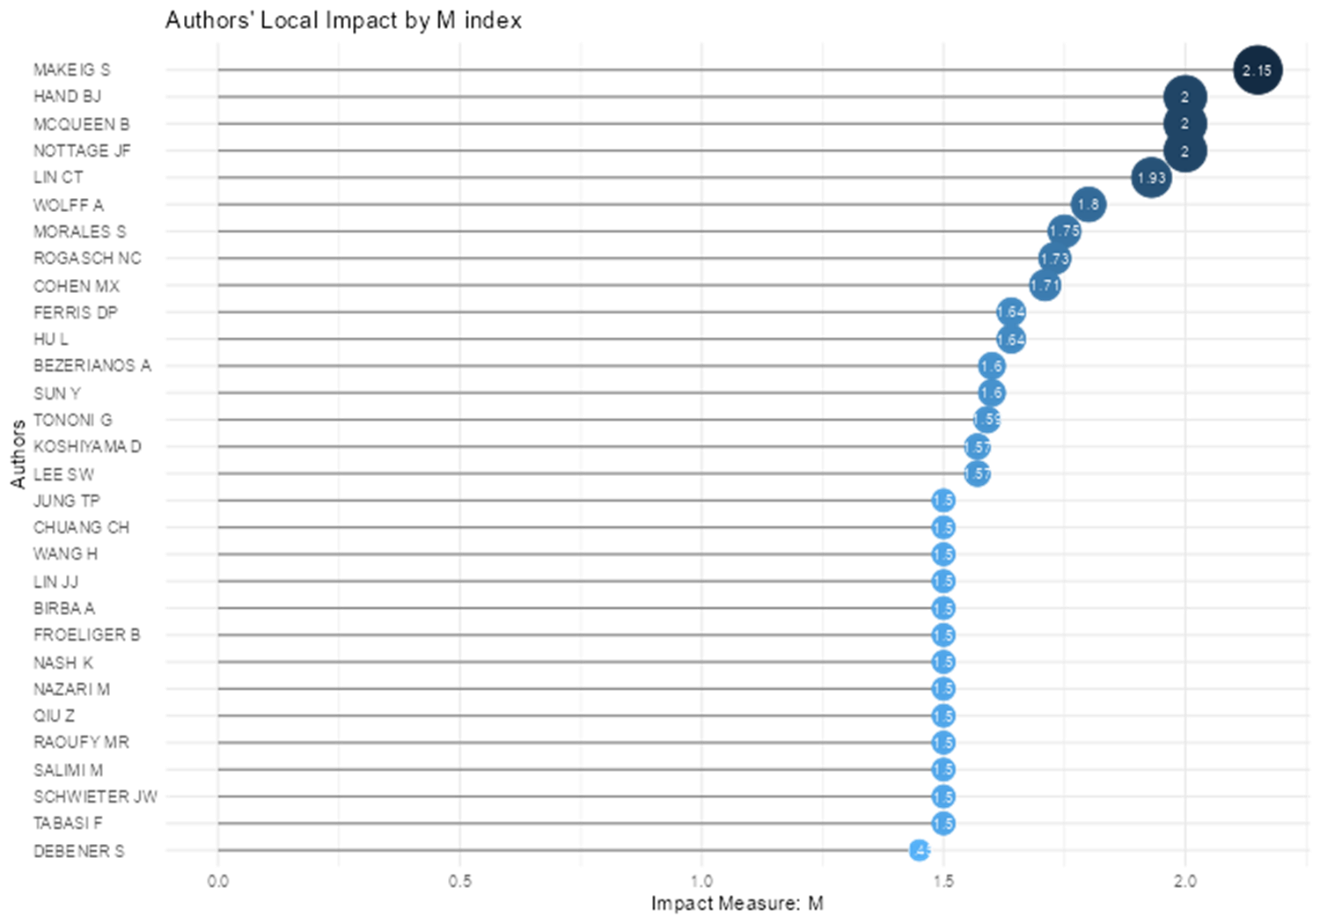


## Author’s Local Impact by Total Citations


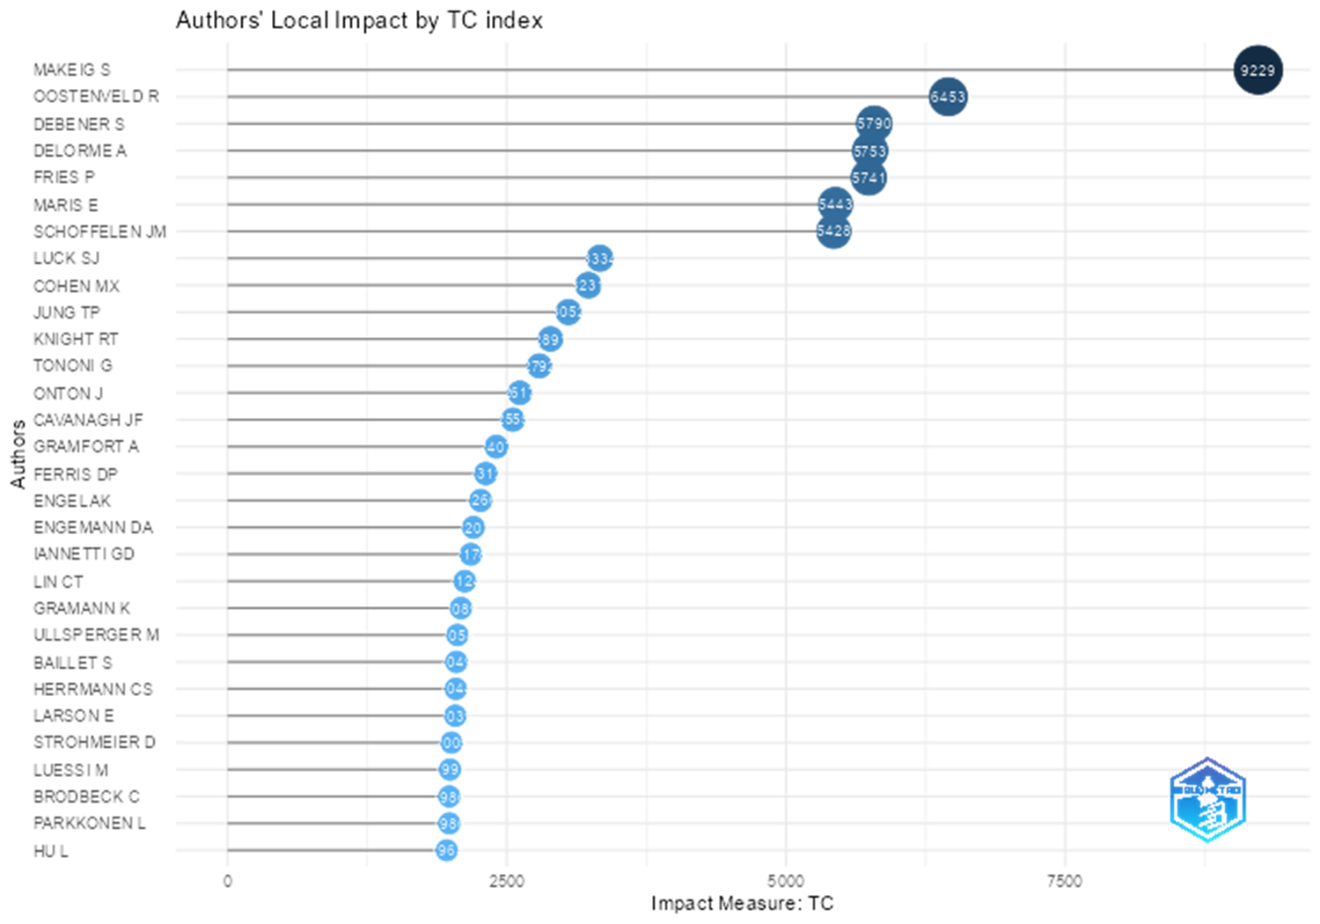


| **Sources** | **Local Impact** | | | | **Number Papers** | **Start Year** |
| --- | --- | --- | --- | --- | --- | --- |
| **H Index** | **G Index** | **M Index** | **Total Citations** |
| **Scott Makeig** | 43 | 74 | 2.15 | 9229 | 74 | 2004 |
| **Tzyy-Ping Jung** | 30 | 55 | 1.5 | 3052 | 59 | 2004 |
| **Mike X Cohen** | 29 | 46 | 1.705882 | 3231 | 46 | 2007 |
| **Stefan Debener** | 29 | 70 | 1.45 | 5790 | 70 | 2004 |
| **Robert Thomas Knight** | 29 | 50 | 1.45 | 2891 | 50 | 2004 |
| **Chin-Teng Lin** | 29 | 45 | 1.933333 | 2124 | 66 | 2009 |
| **Giulio Tononi** | 27 | 46 | 1.588235 | 2792 | 46 | 2007 |
| **Arnaud Delorme** | 23 | 45 | 1.15 | 5753 | 45 | 2004 |
| **Daniel P. Ferris** | 23 | 33 | 1.642857 | 2312 | 33 | 2010 |
| **Christoph S Herrmann** | 23 | 35 | 1.277778 | 2044 | 35 | 2006 |

# Documents

## Most Global Cited Documents


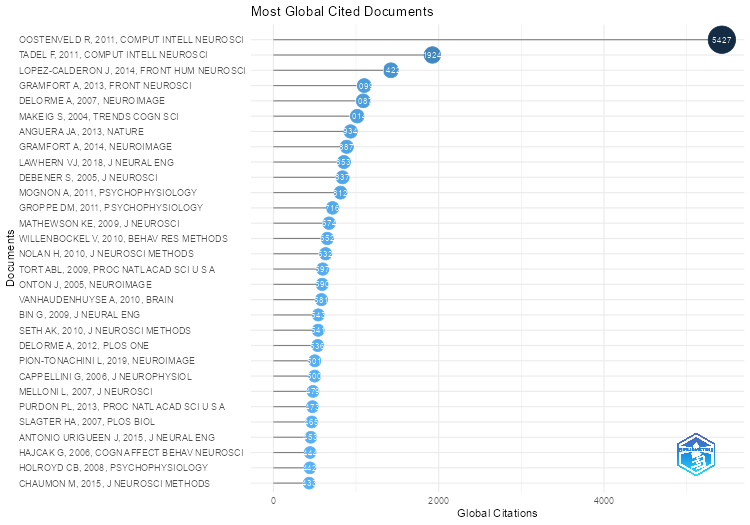


## Most Local Cited Documents


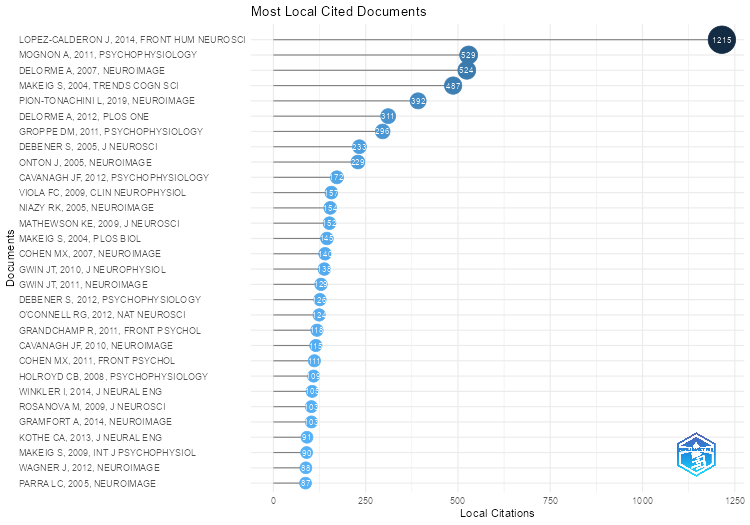


## Most Local Cited References


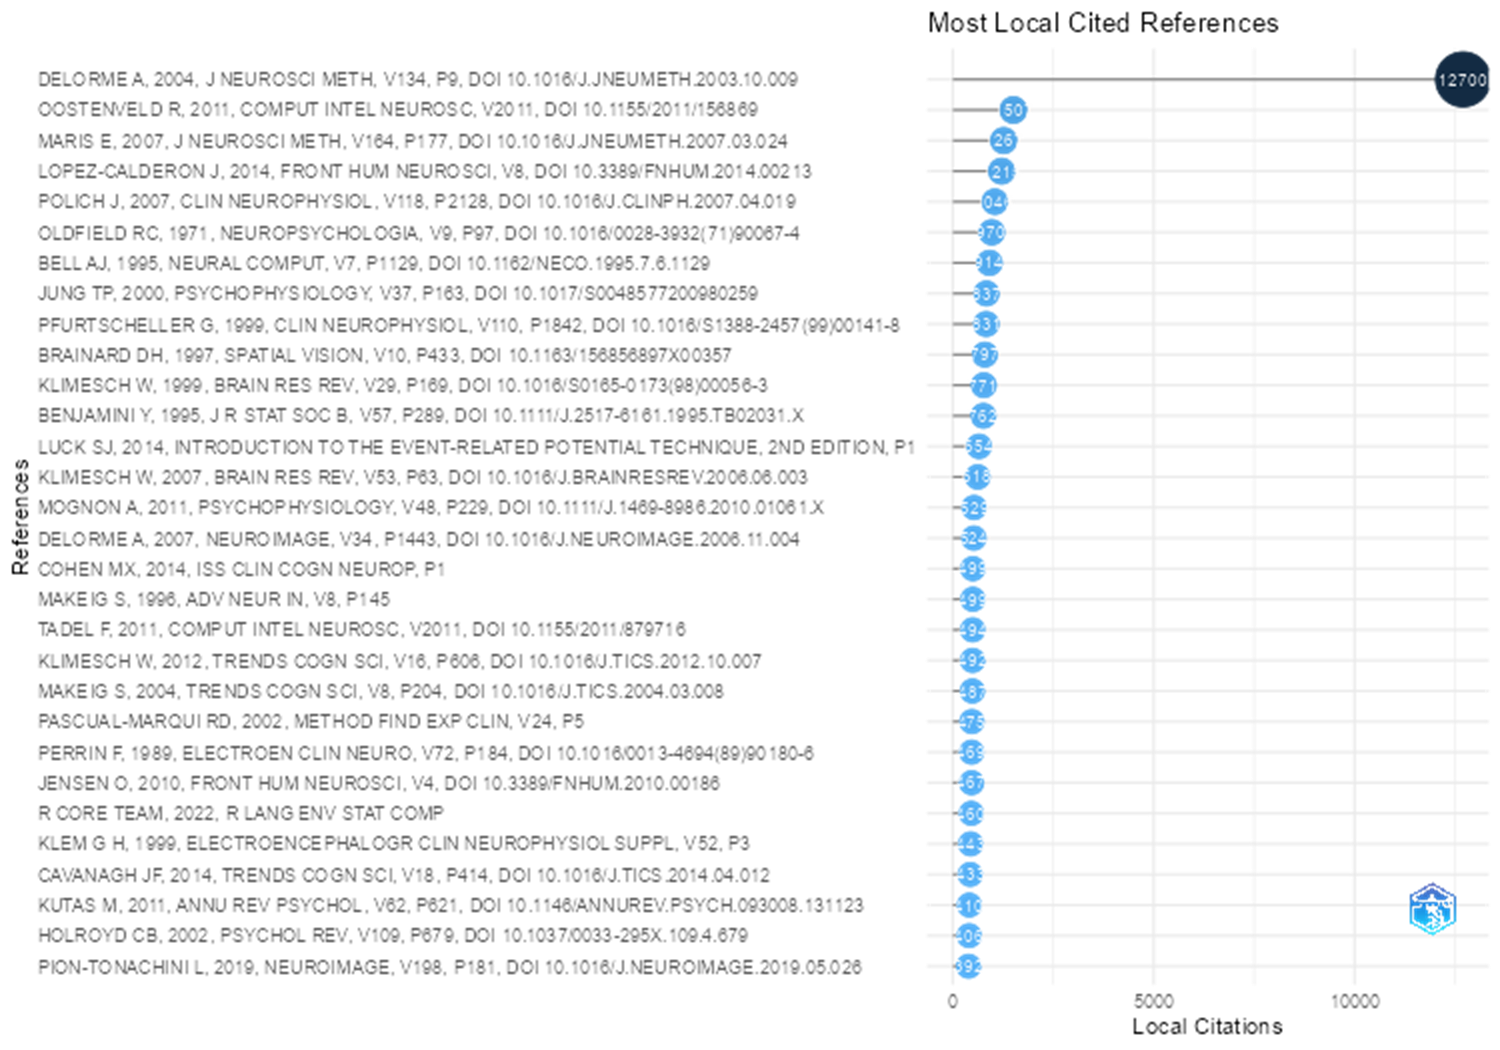


## Most Relevant Keywords Plus


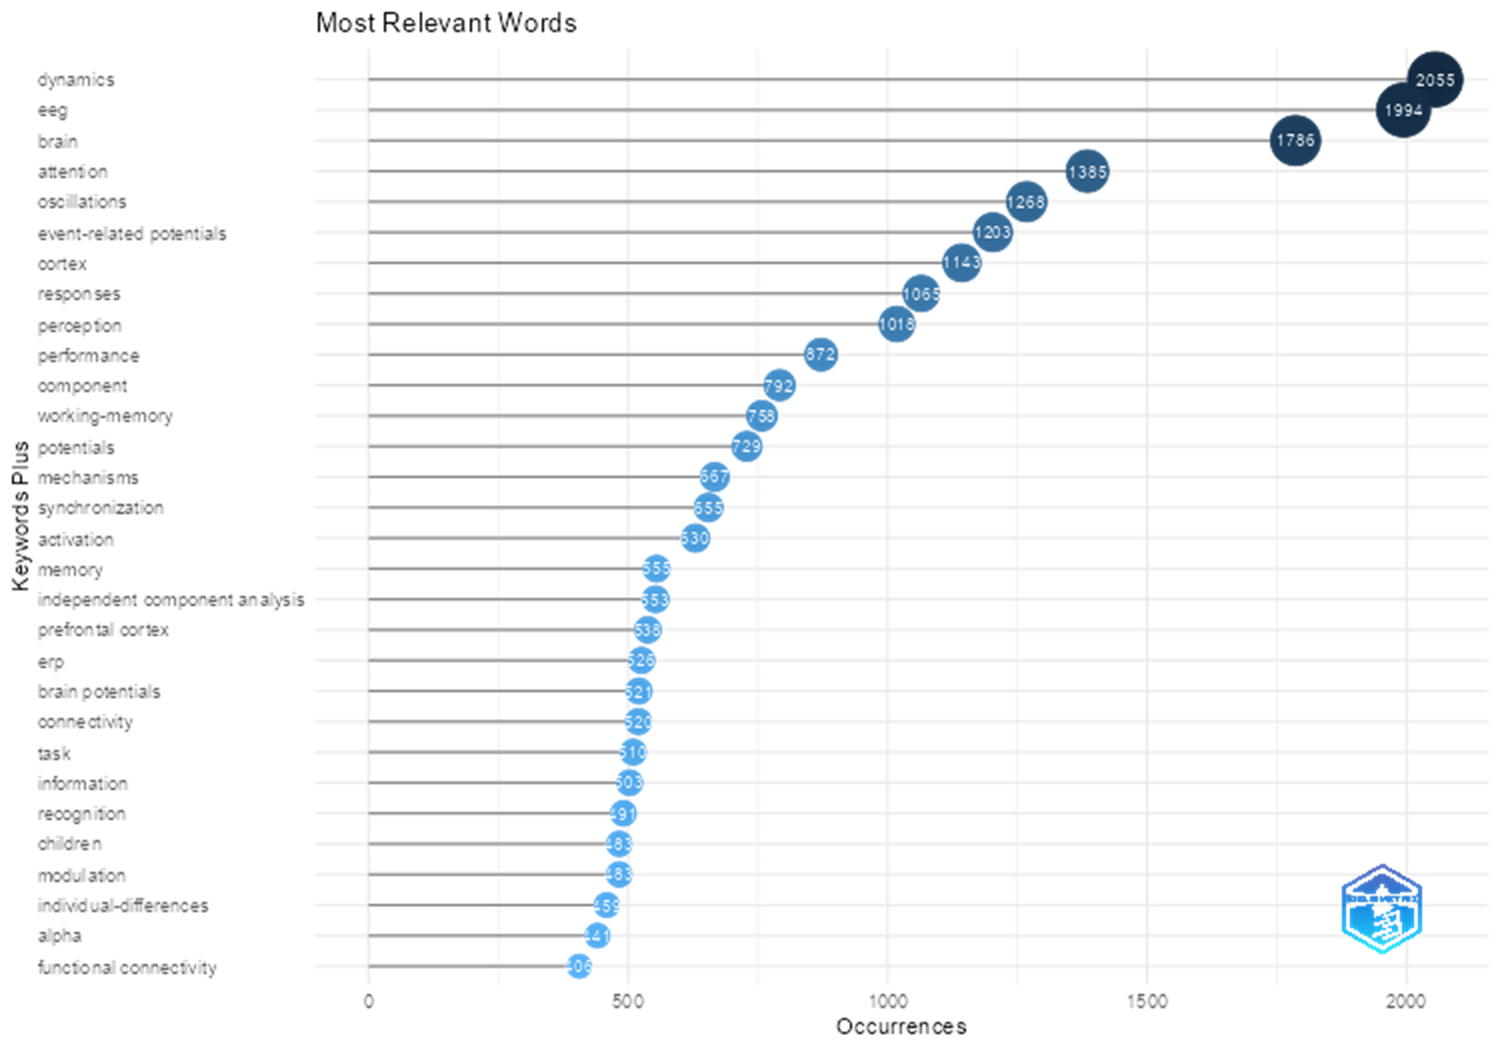


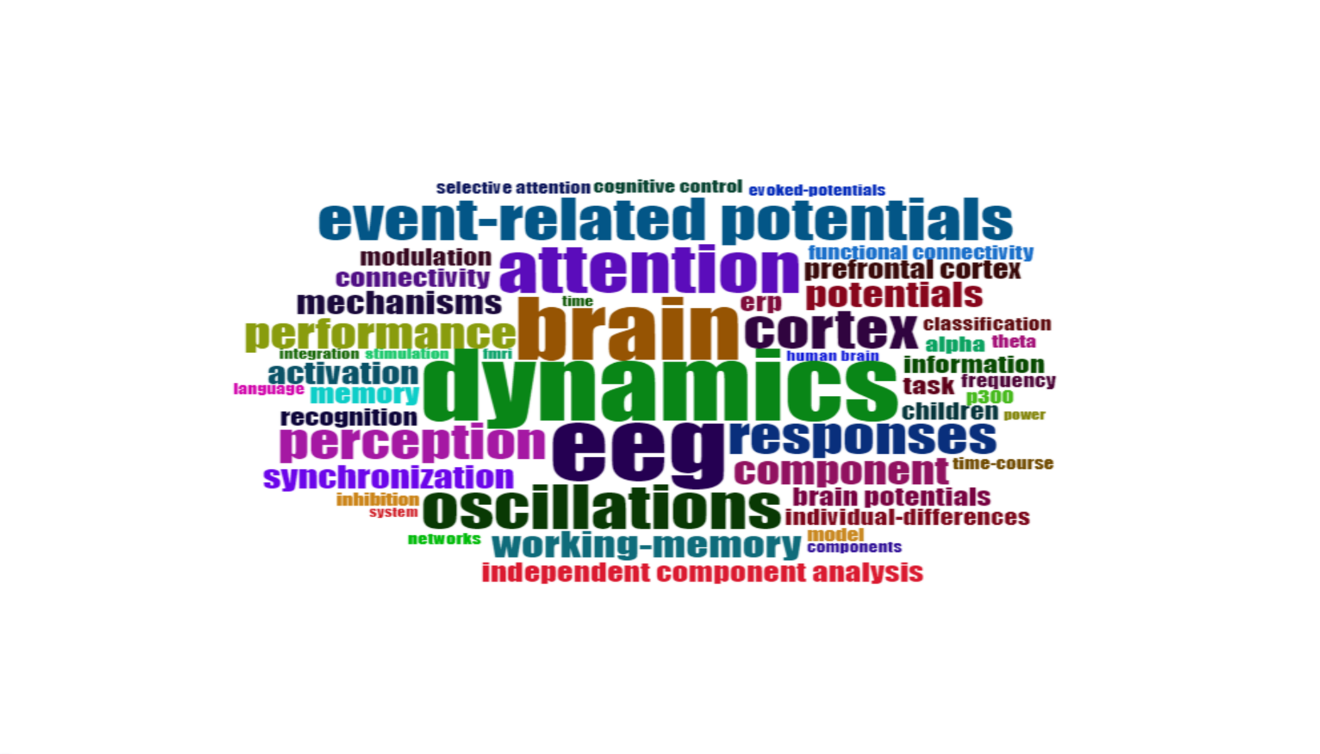


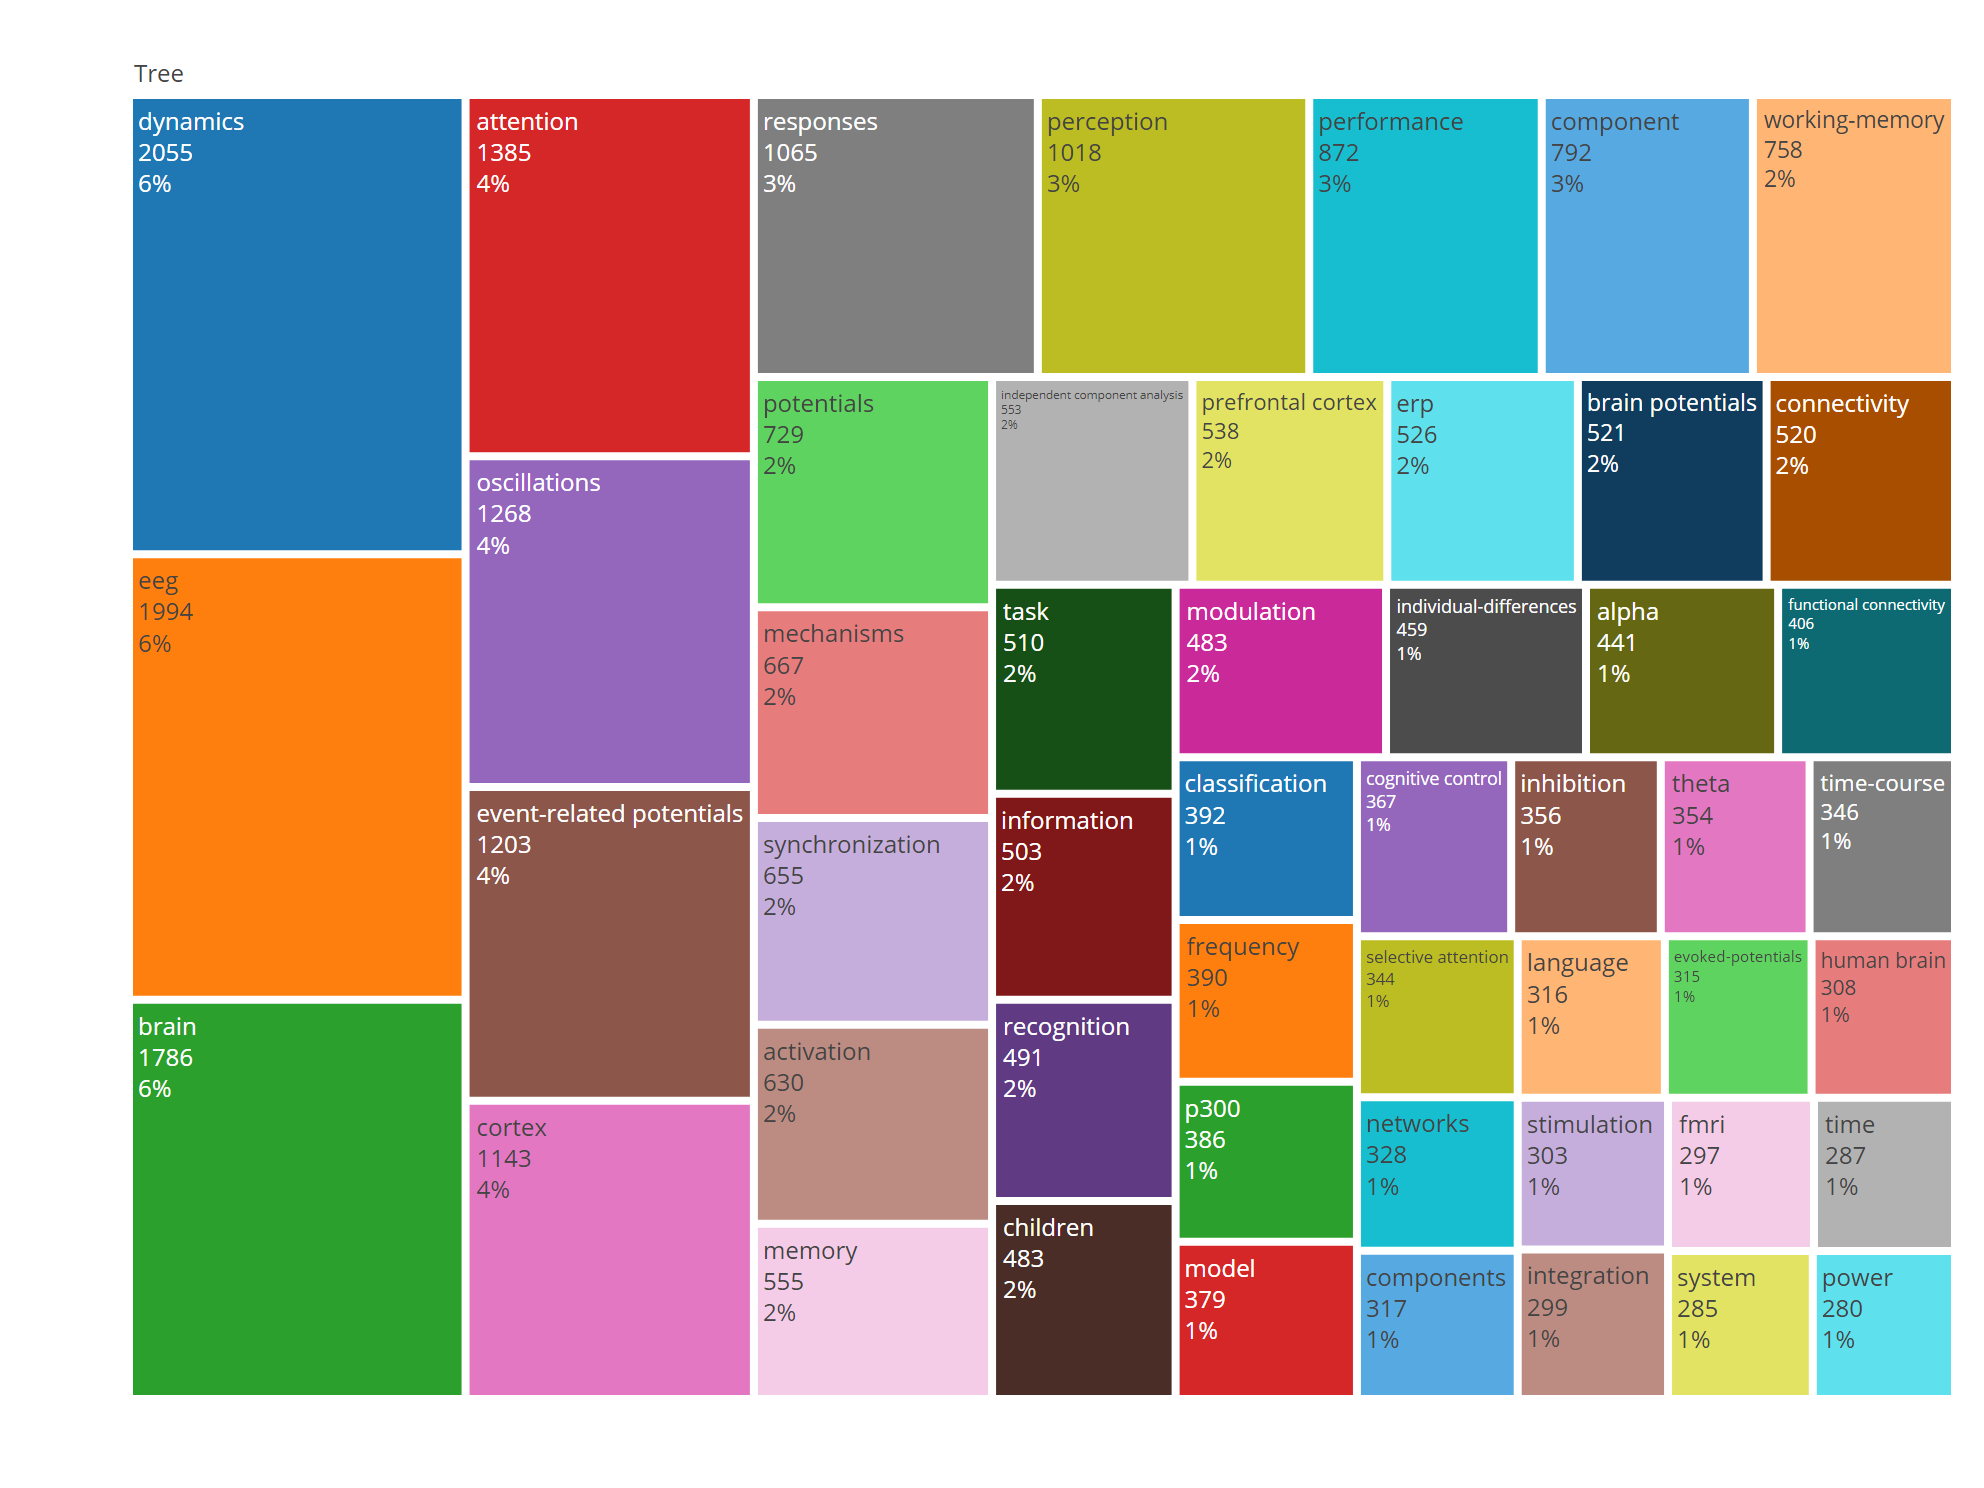


## Most Relevant Authors Keywords


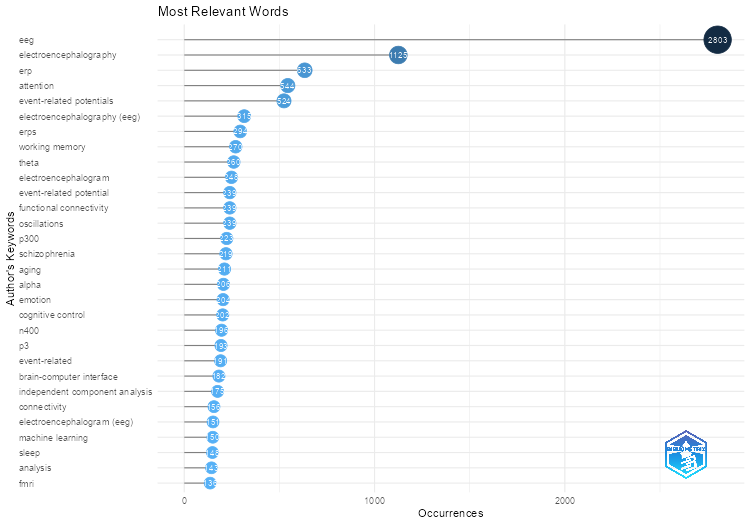


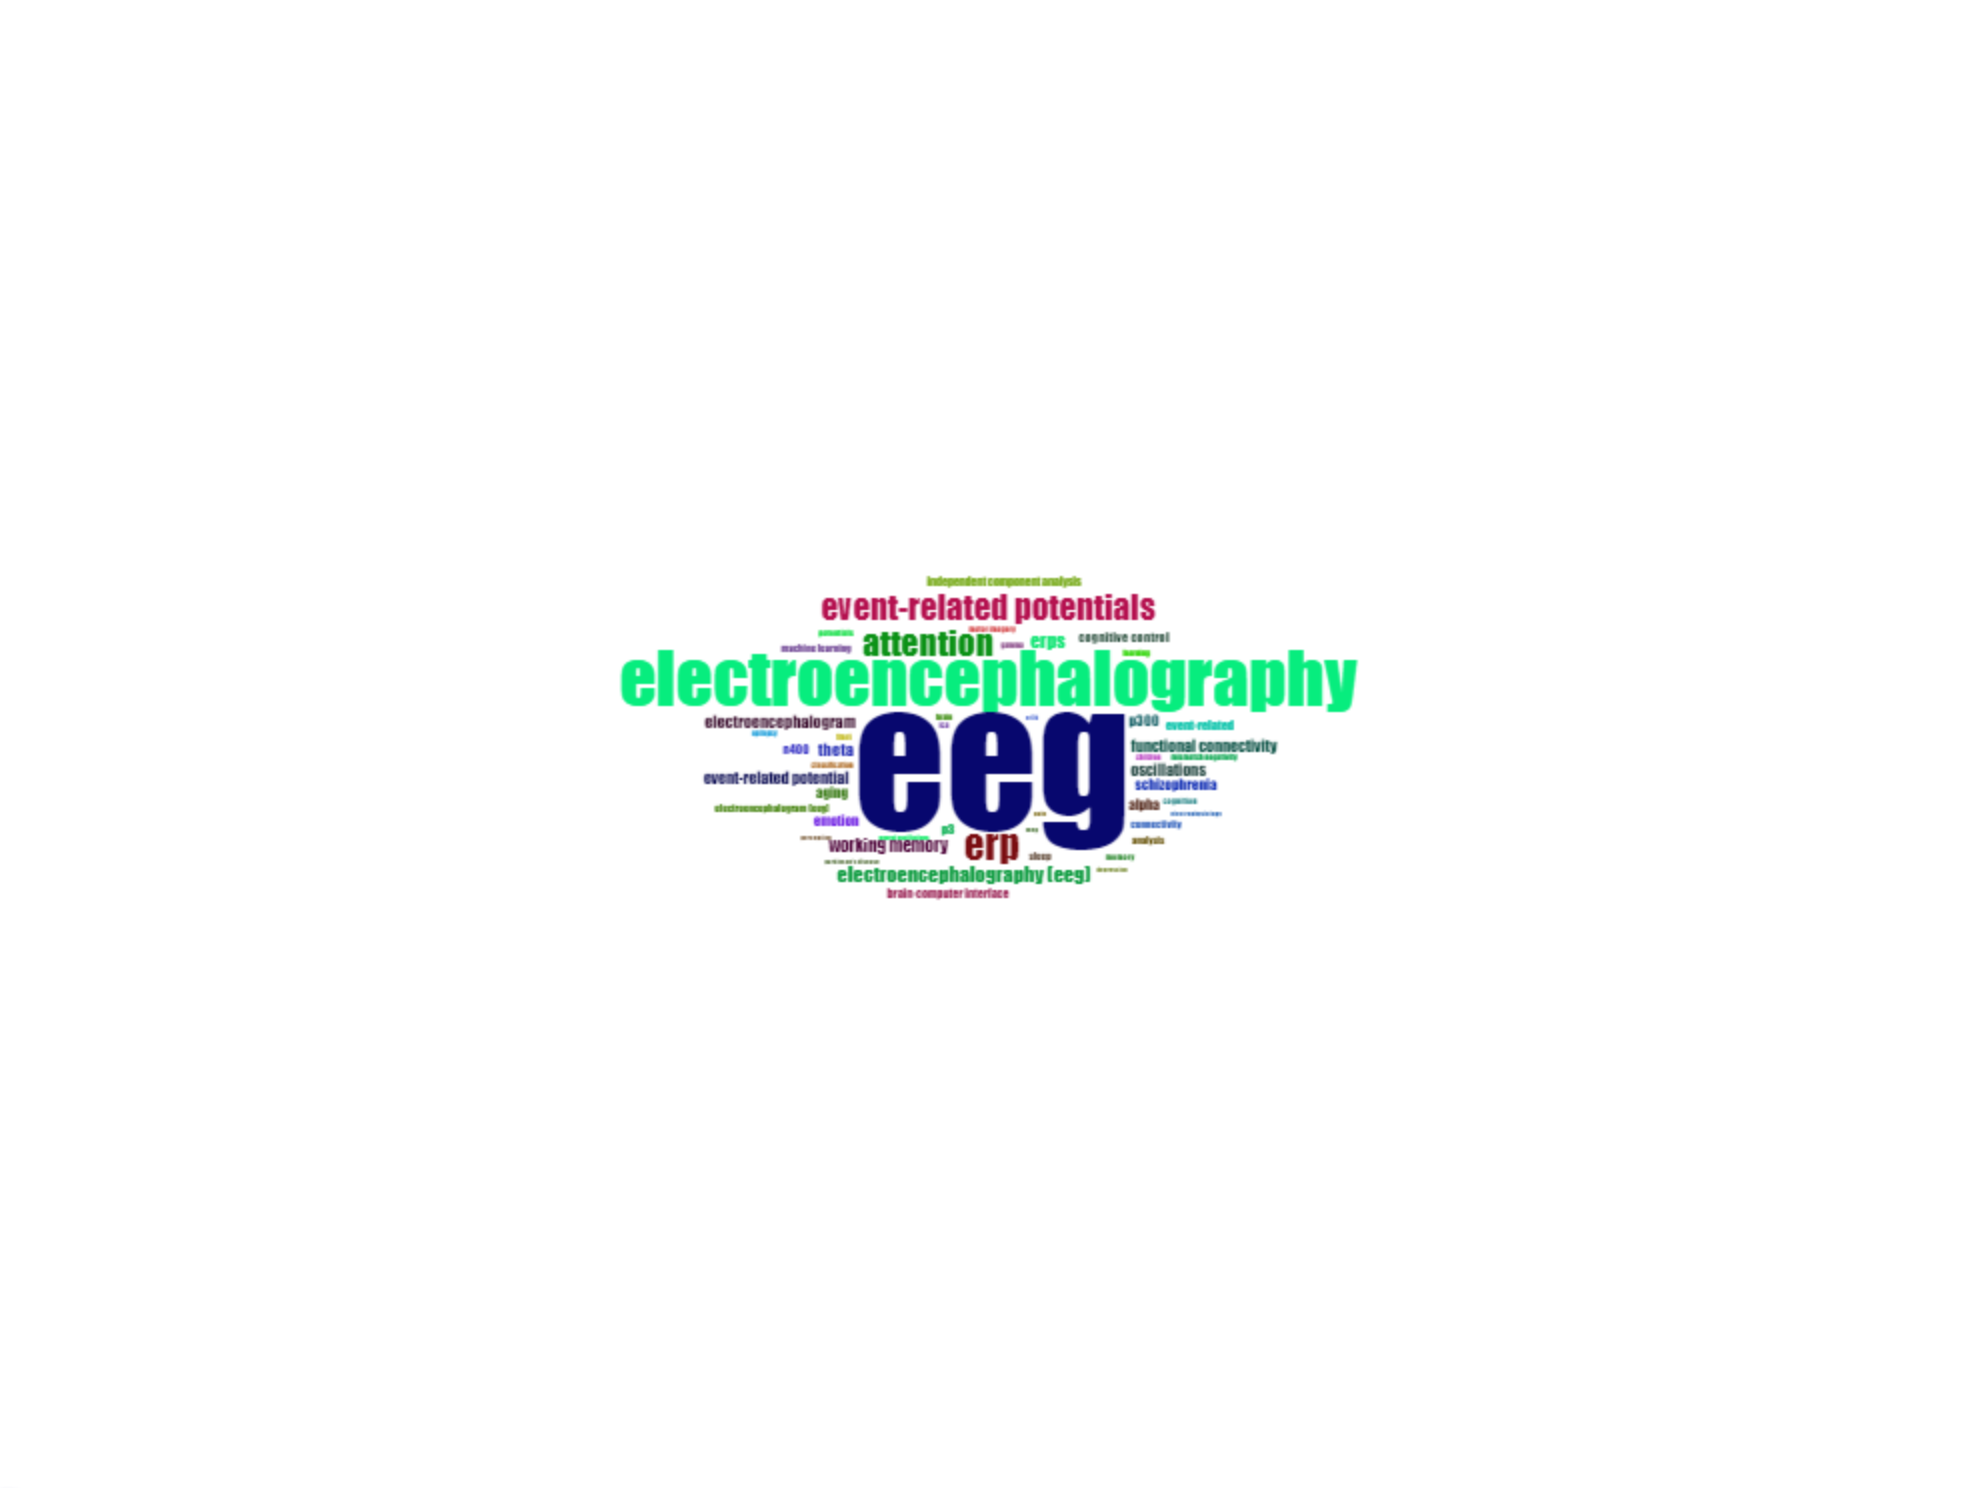


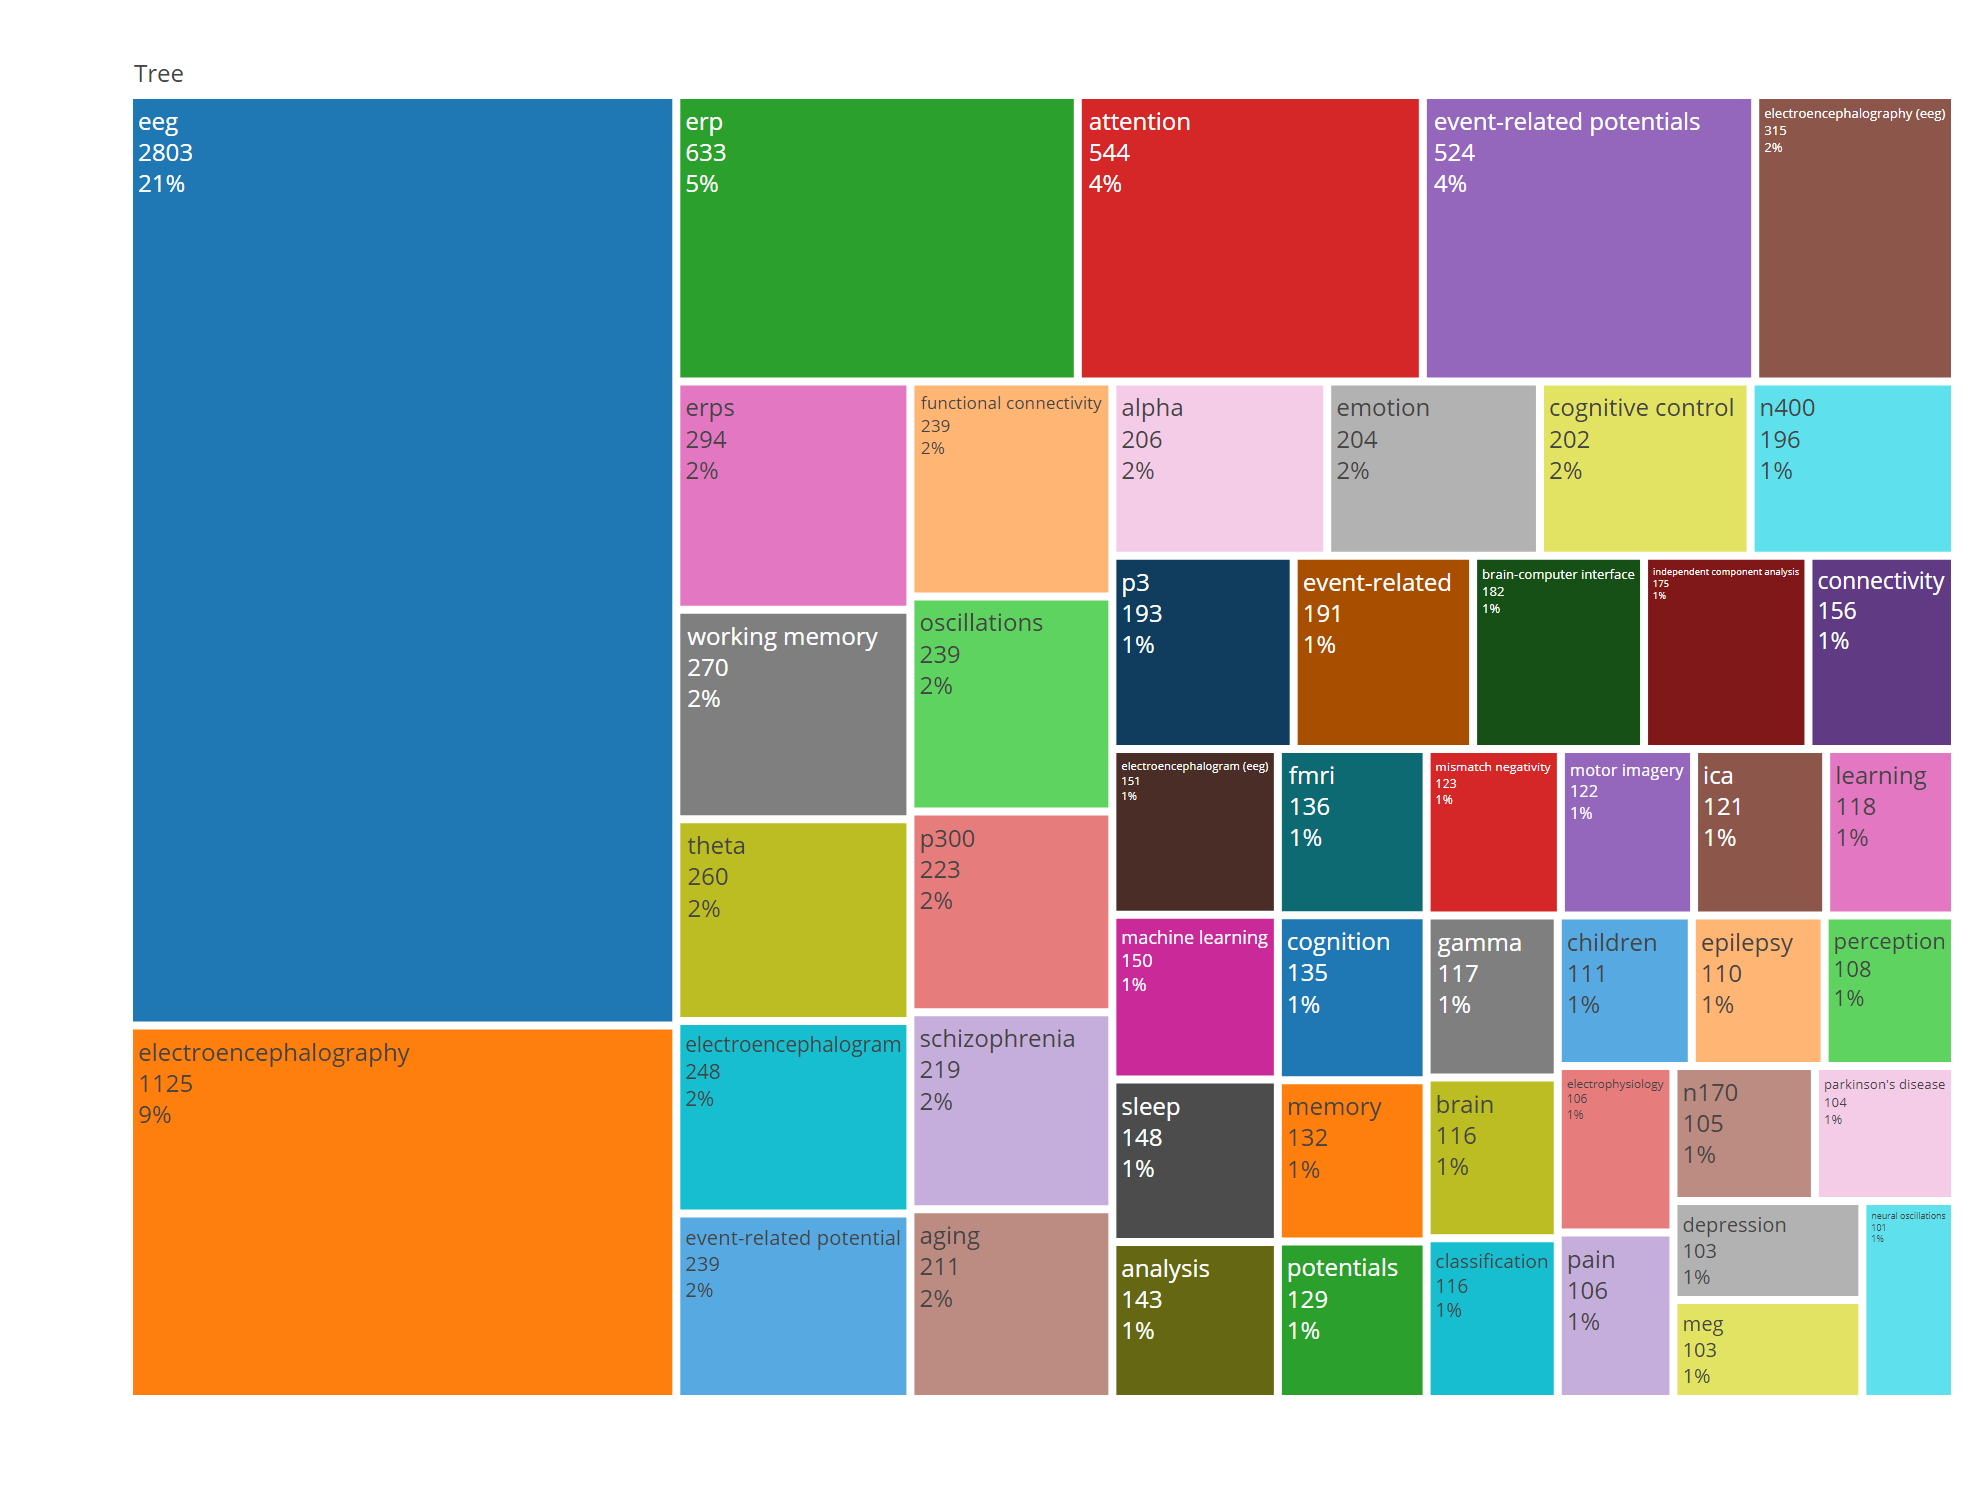


## Most Relevant Unigram words in Title


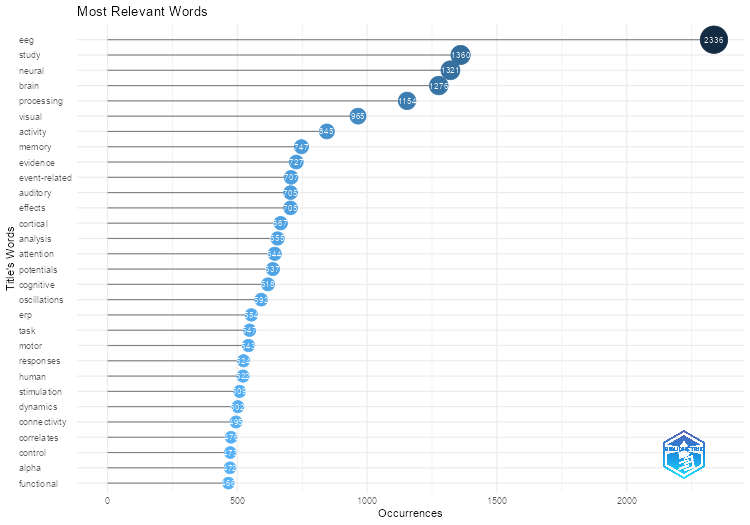


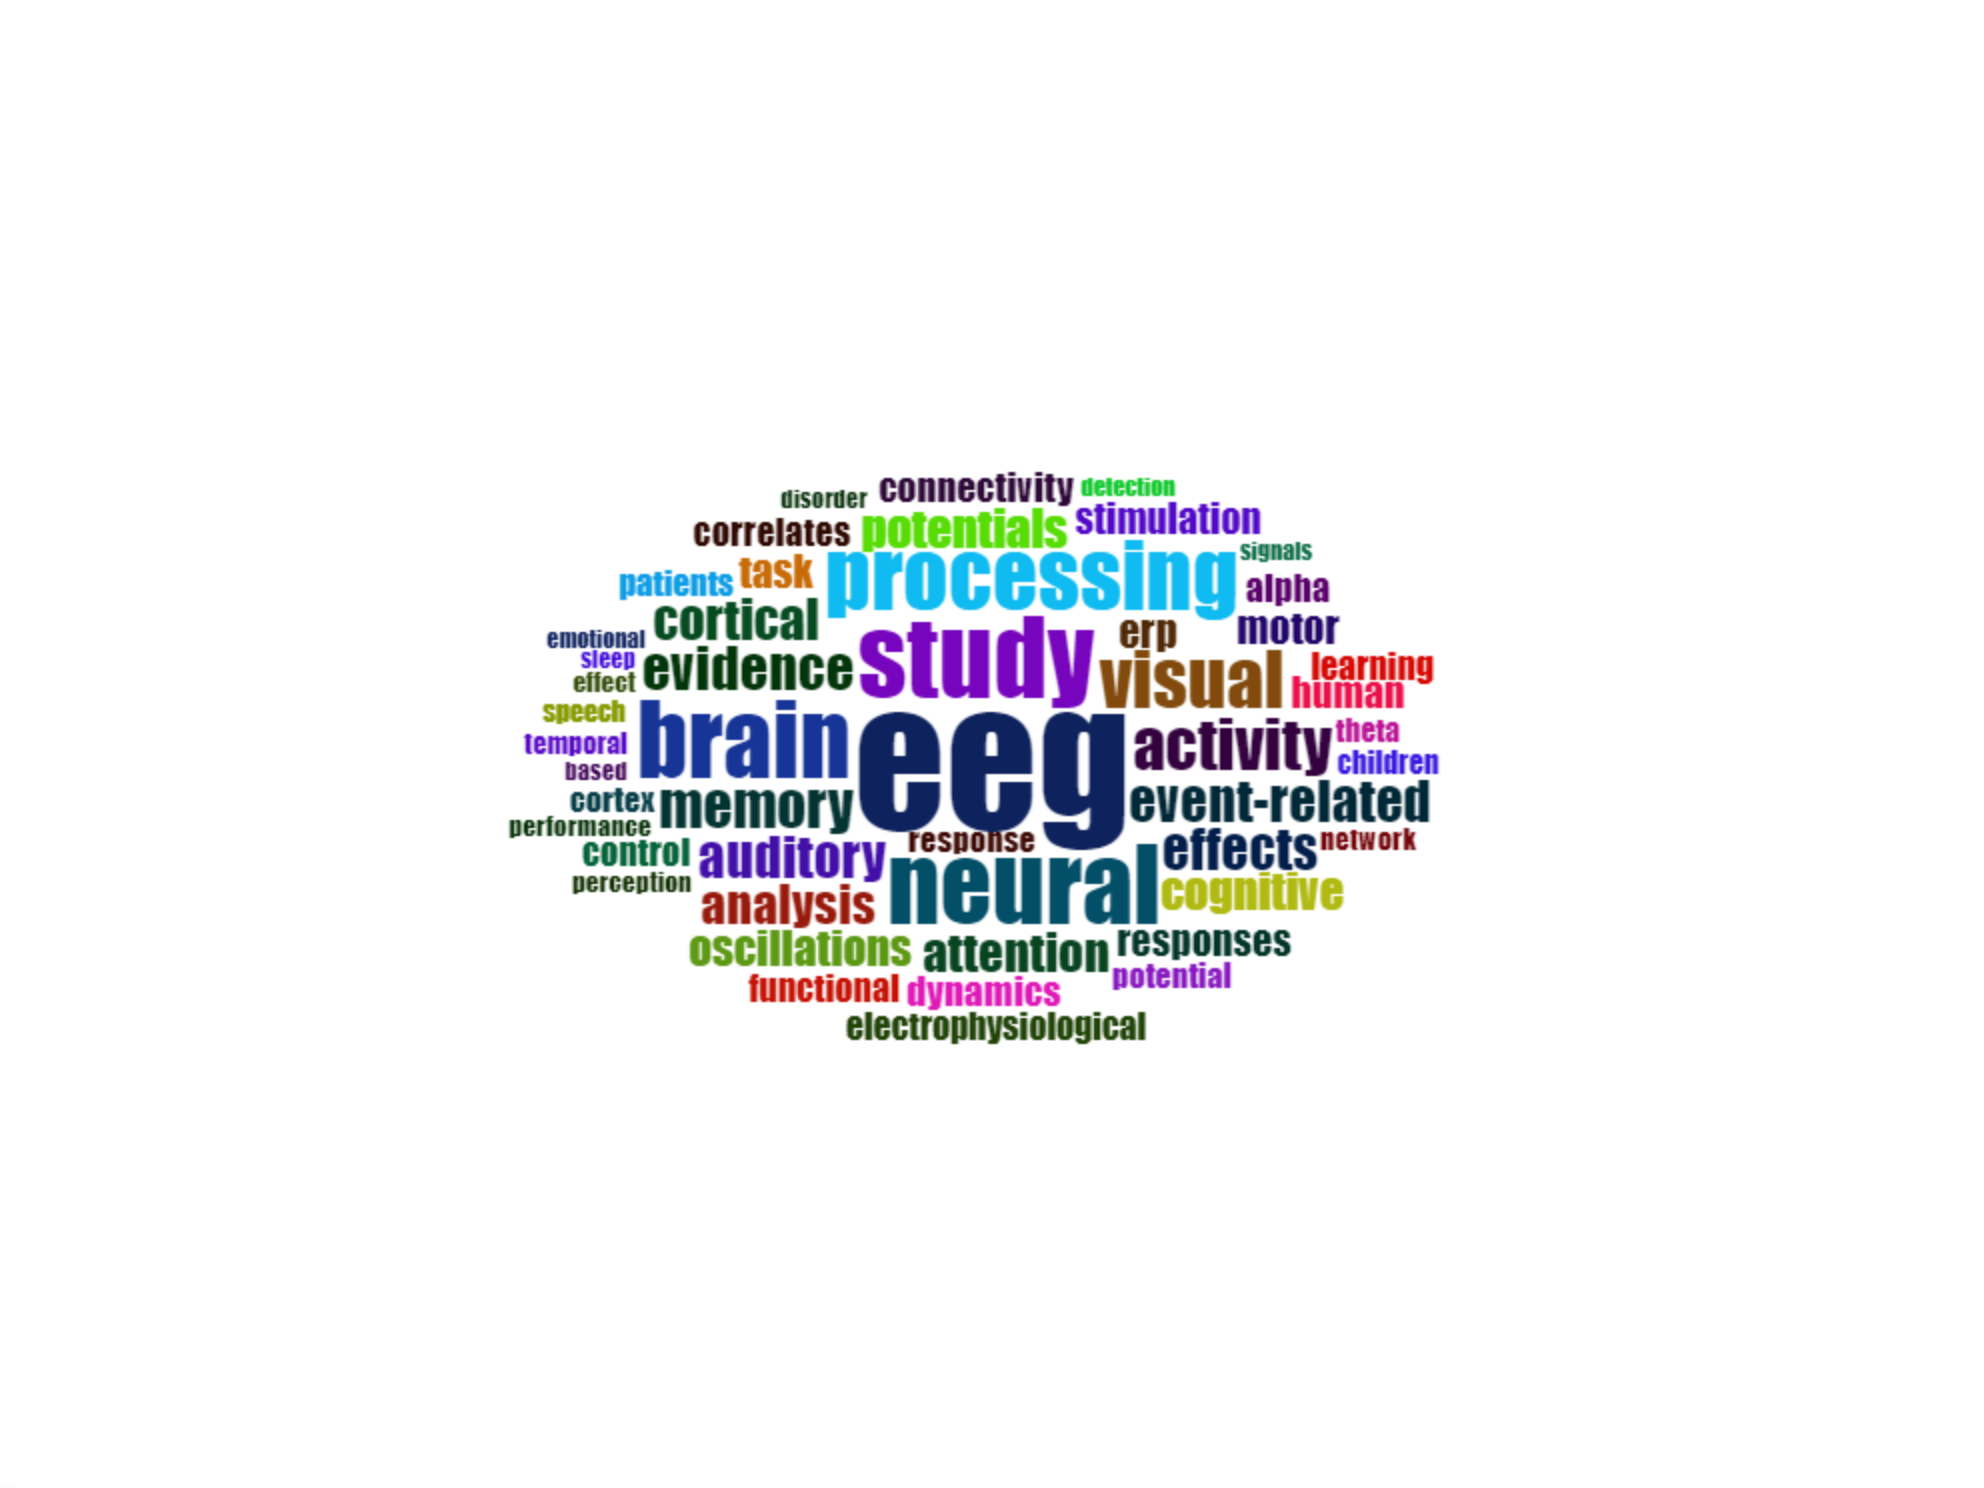


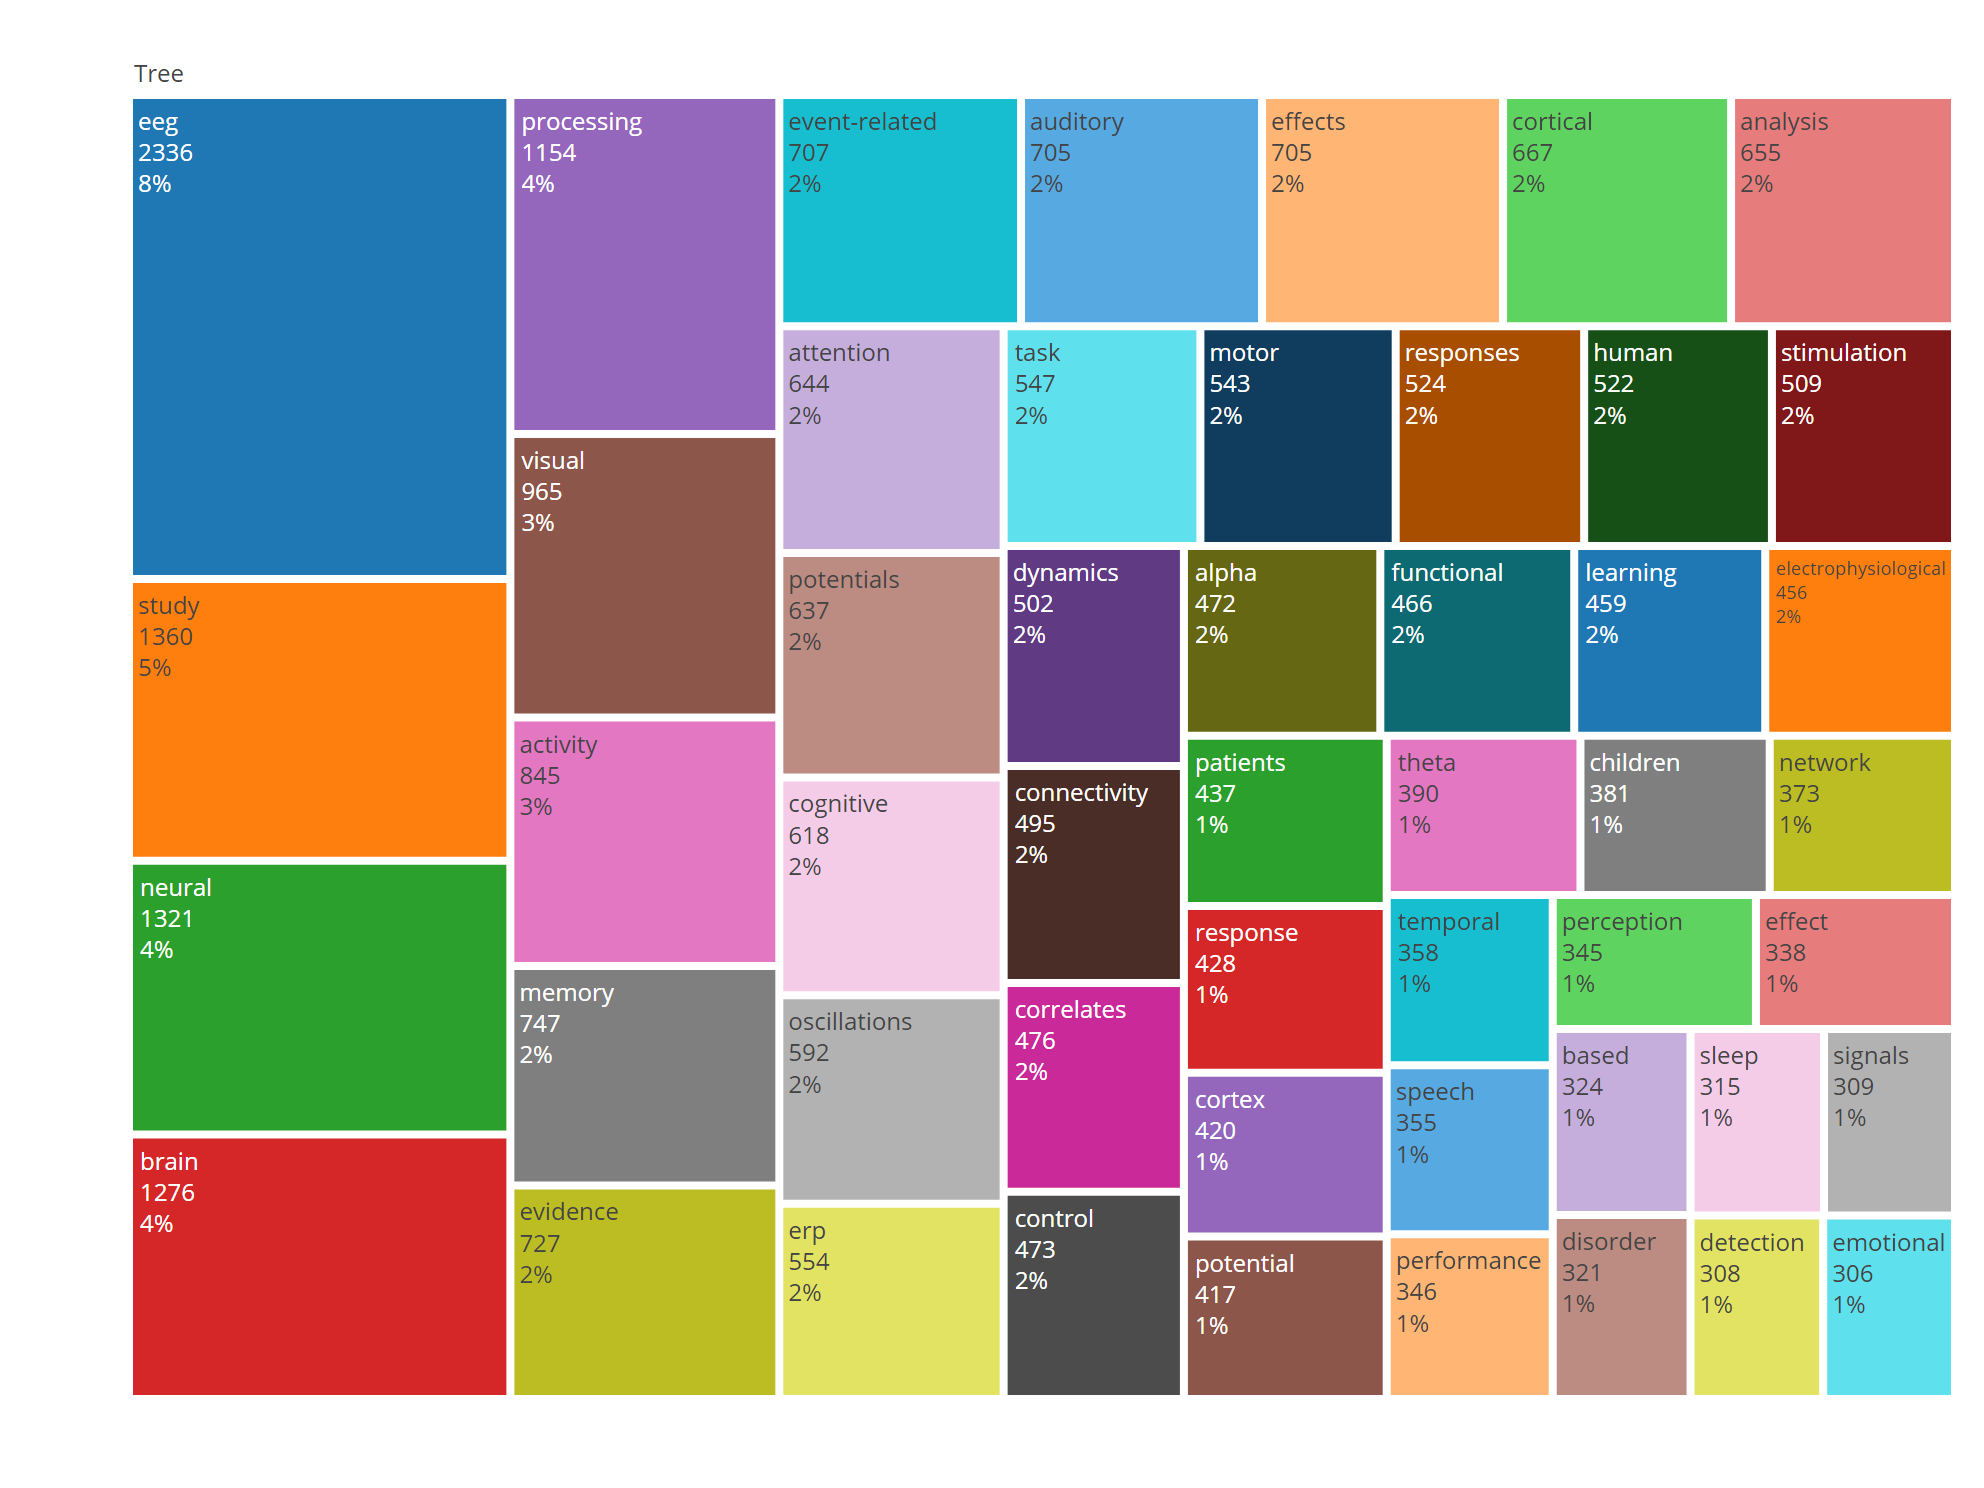


## Most Relevant Bigram words in Title


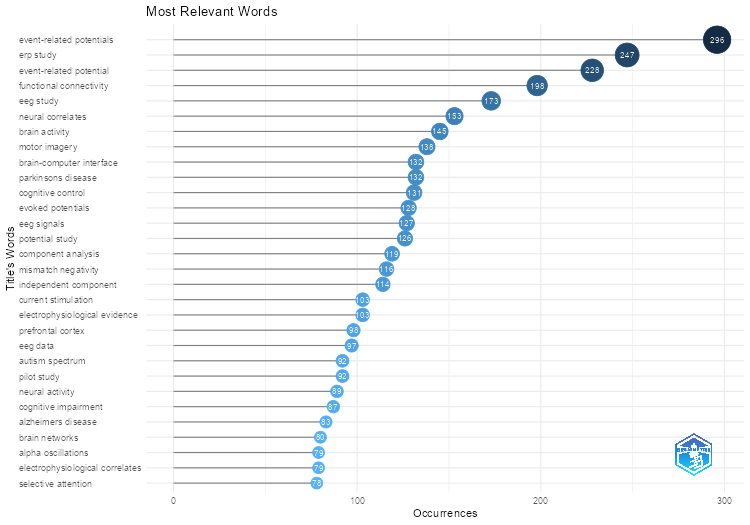


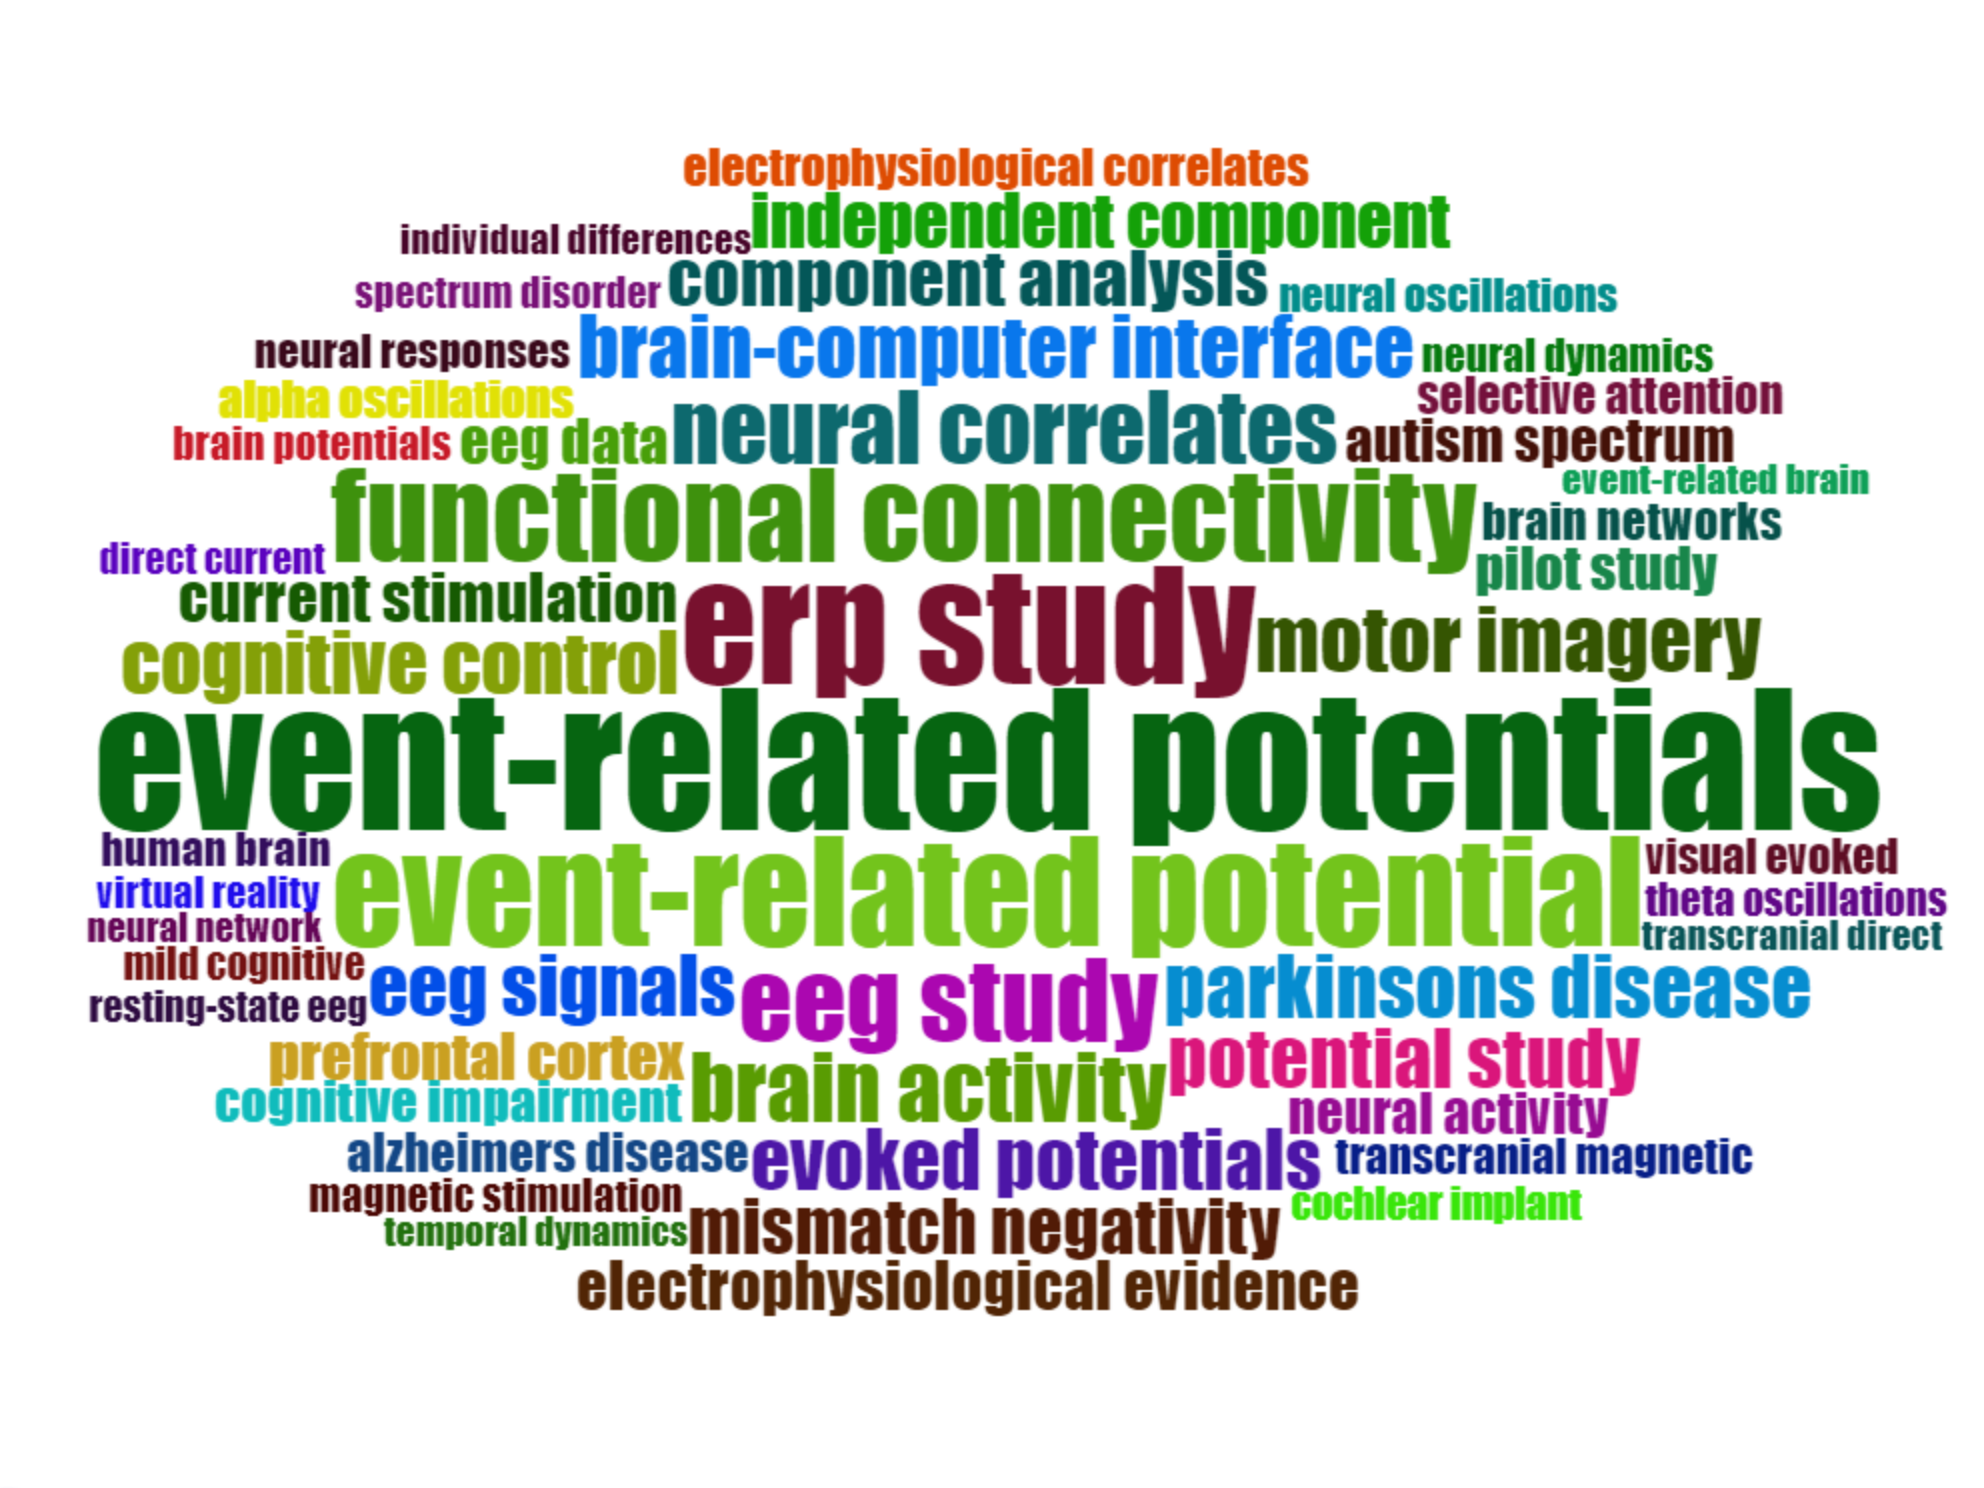


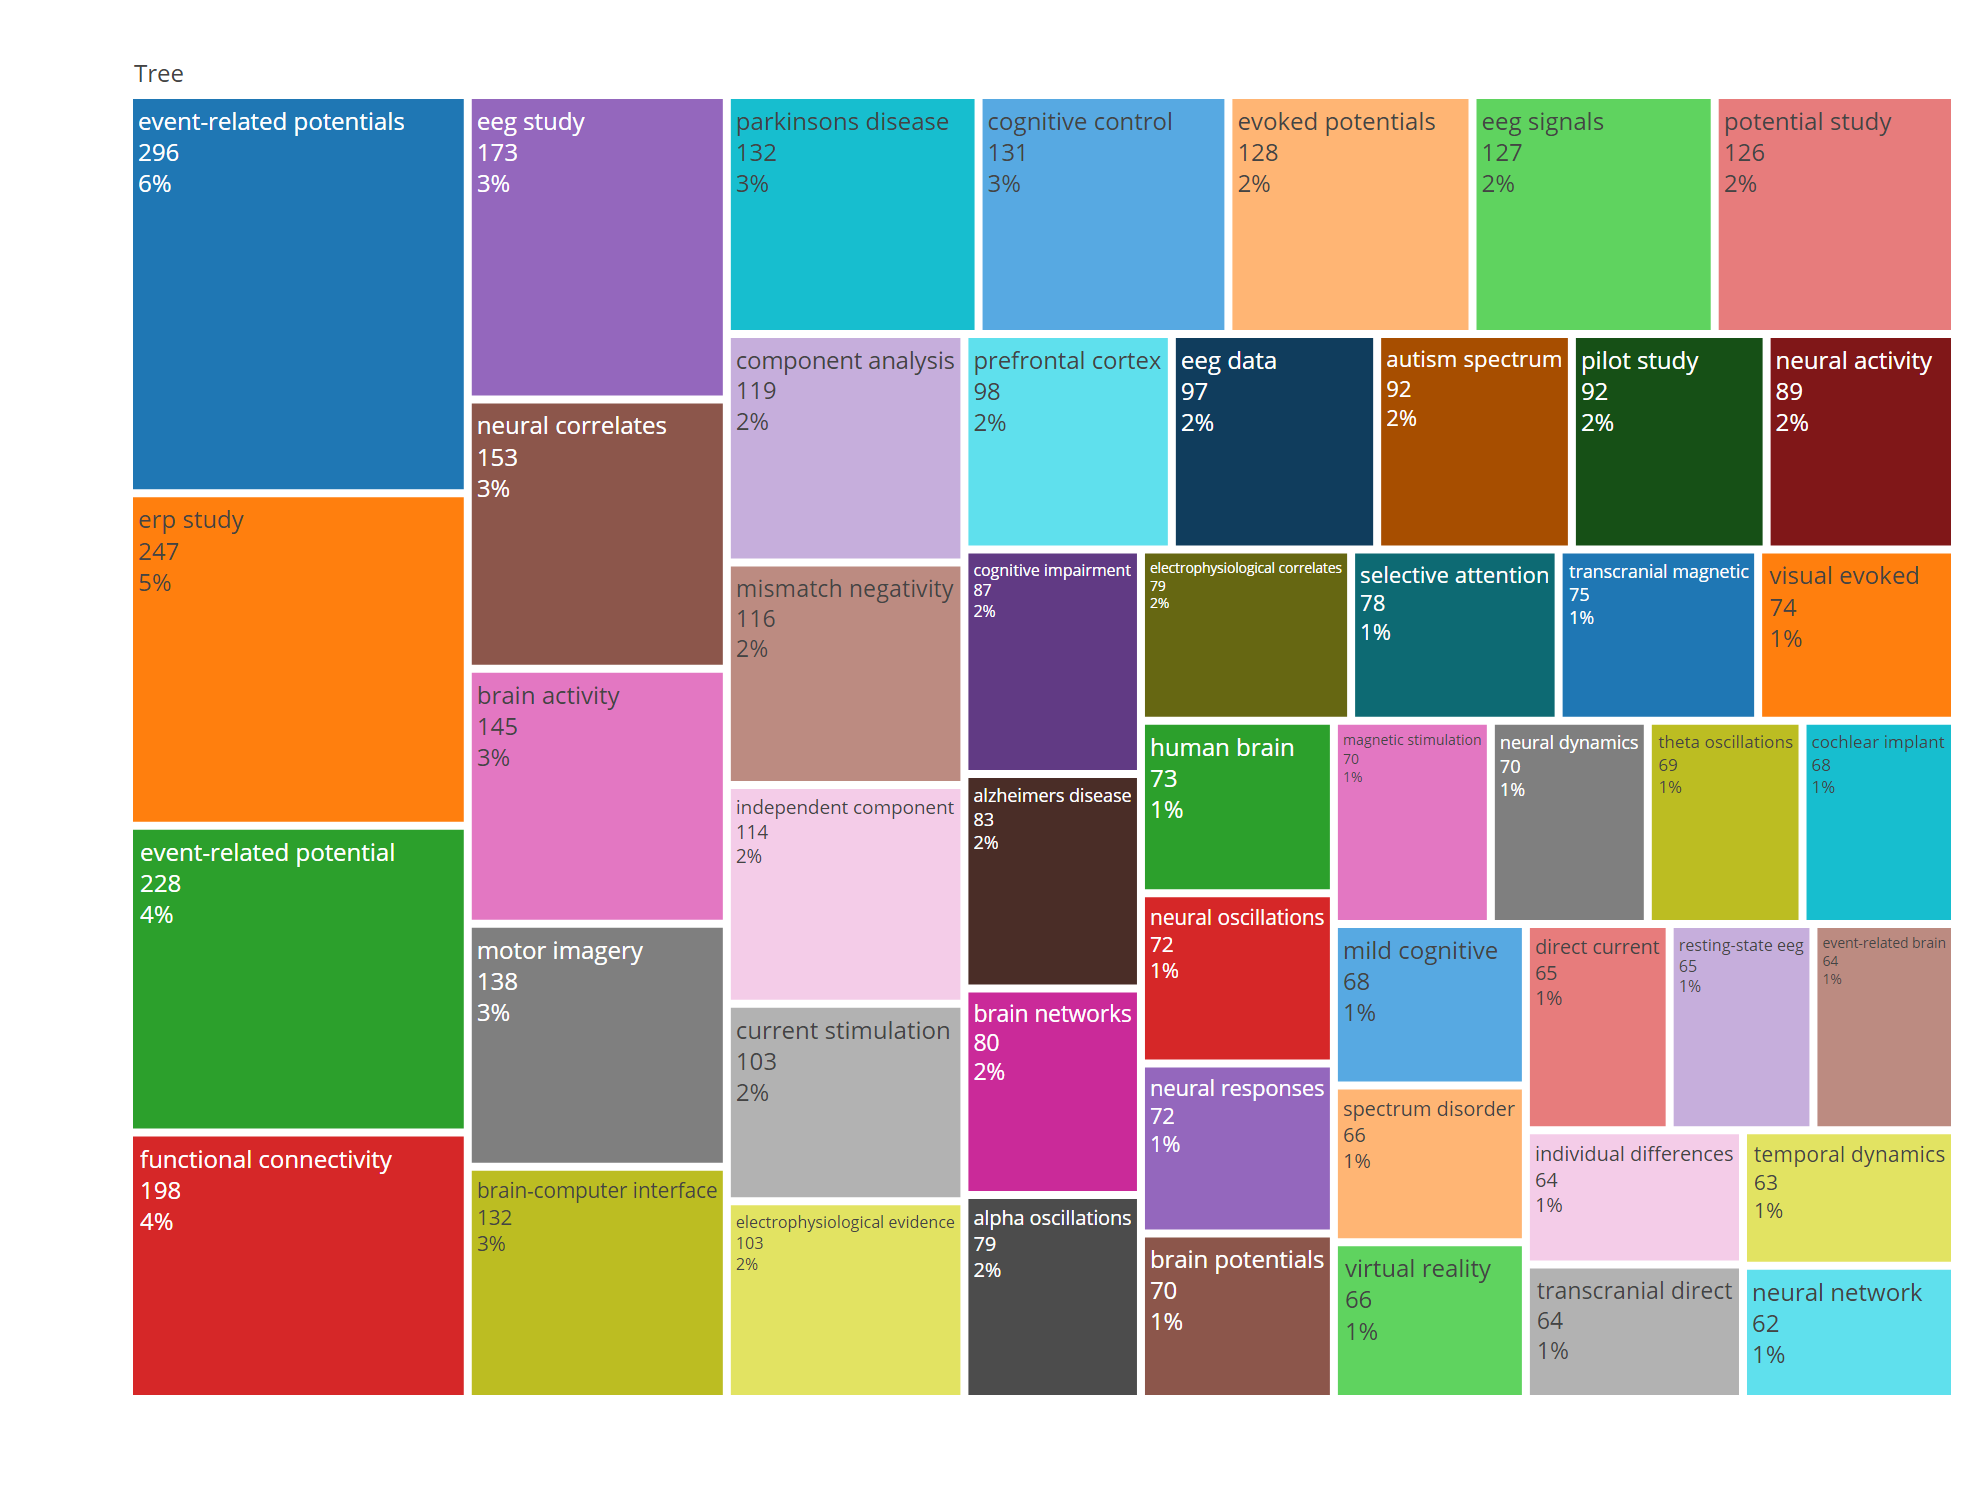


## Most Relevant Trigram words in Title


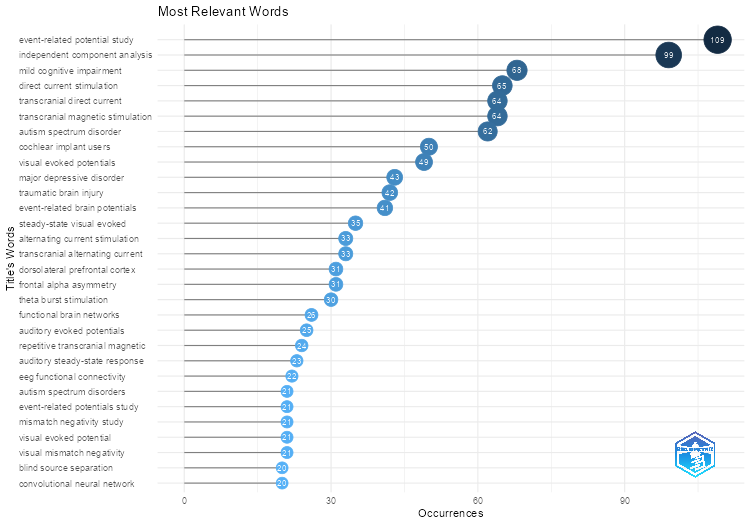


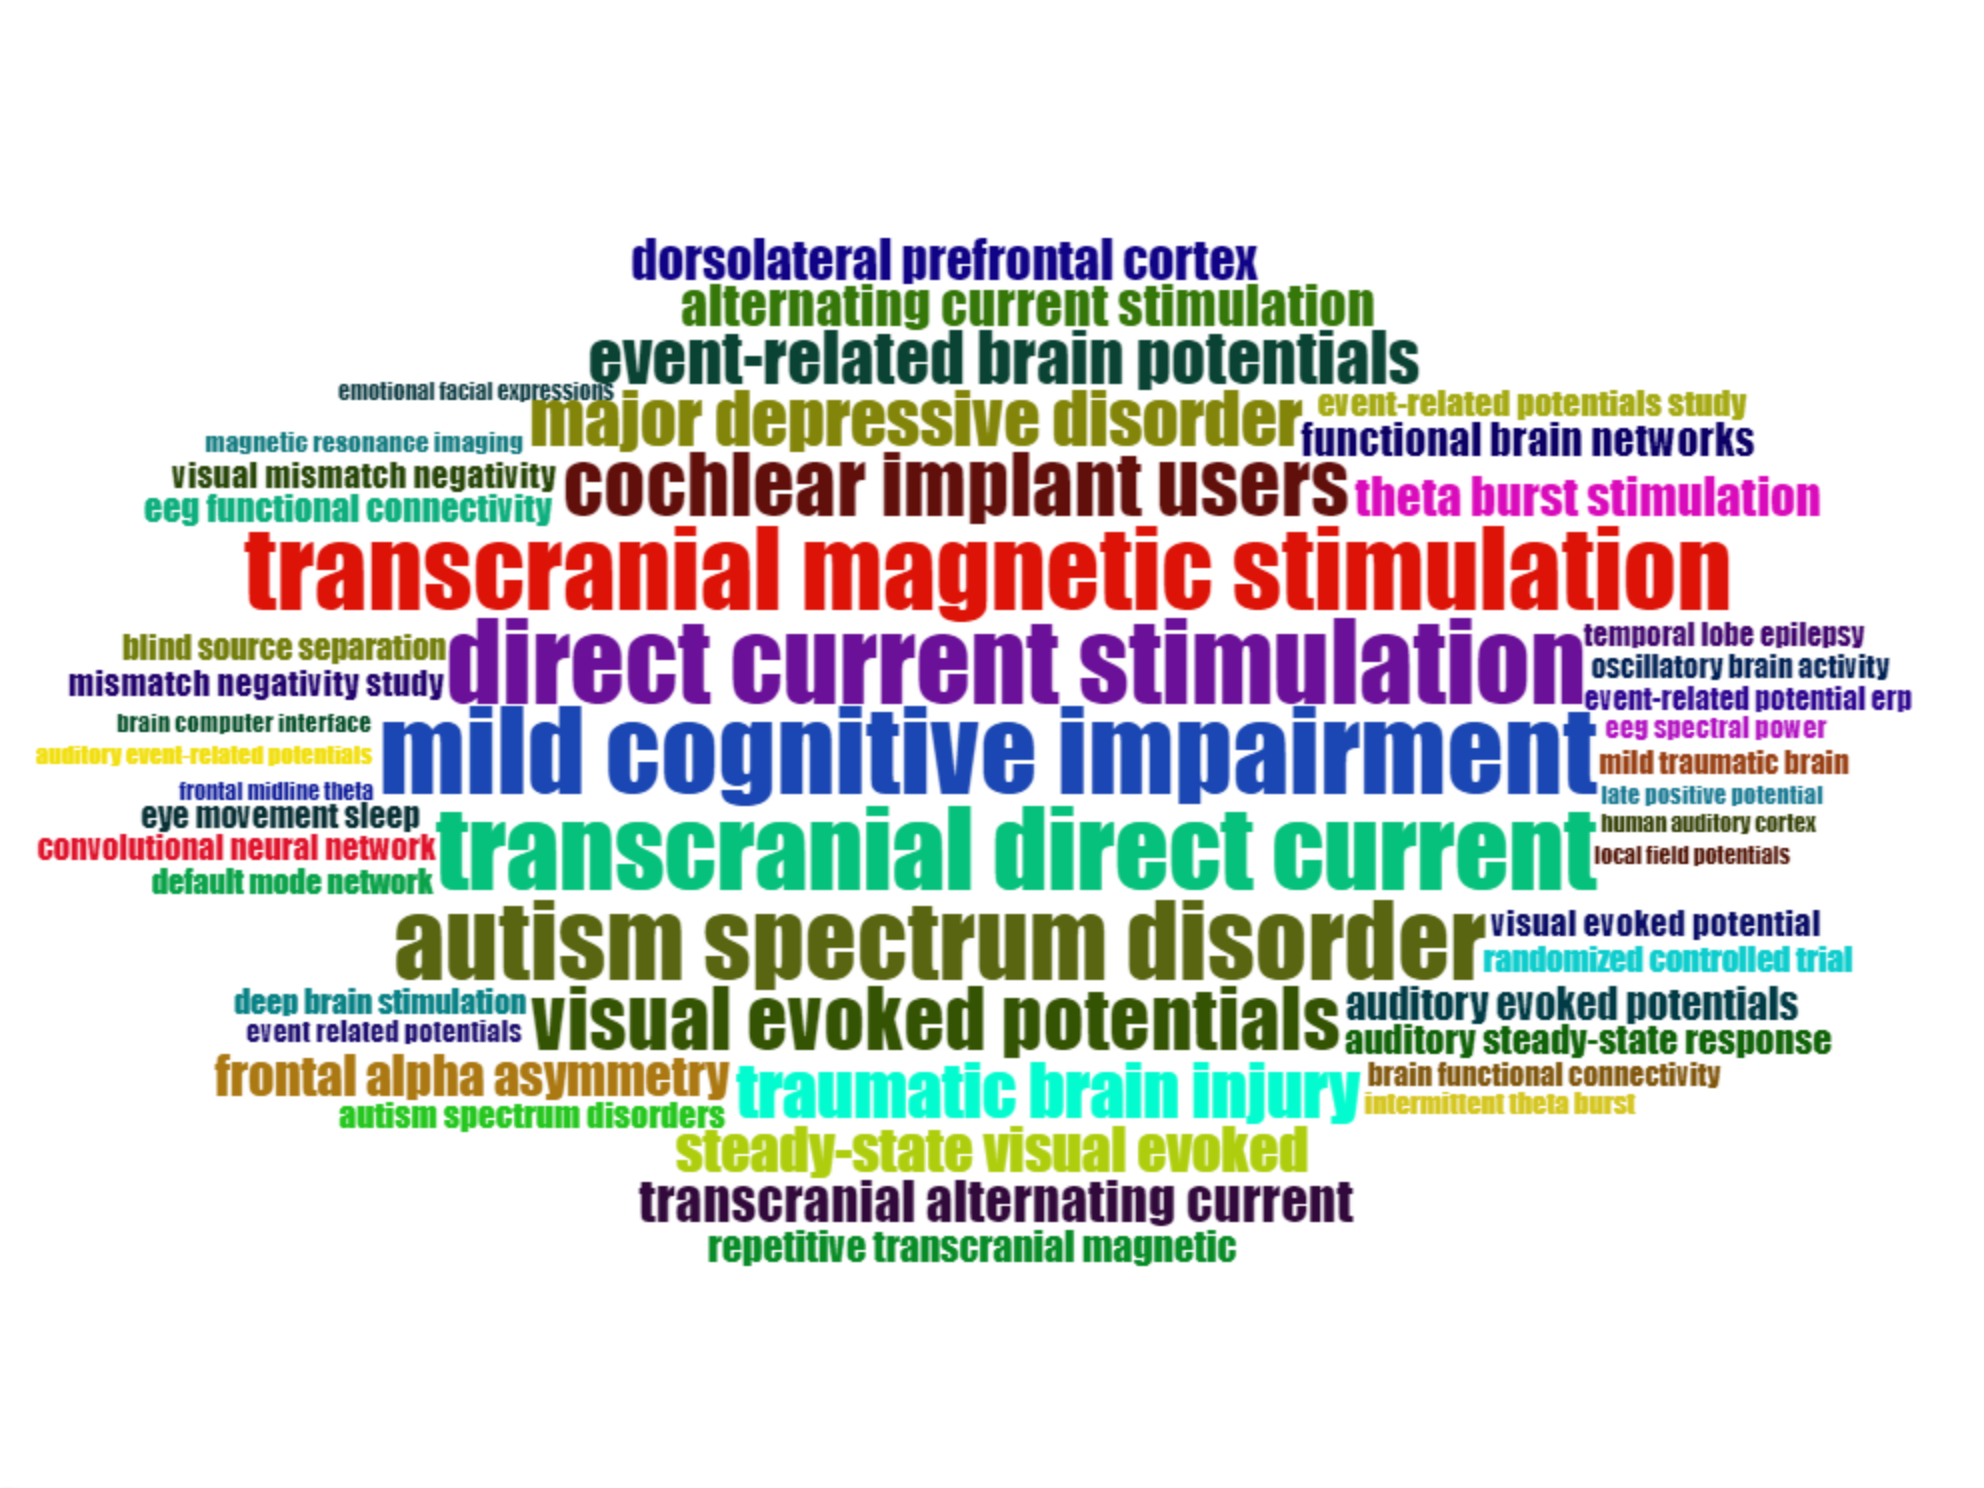

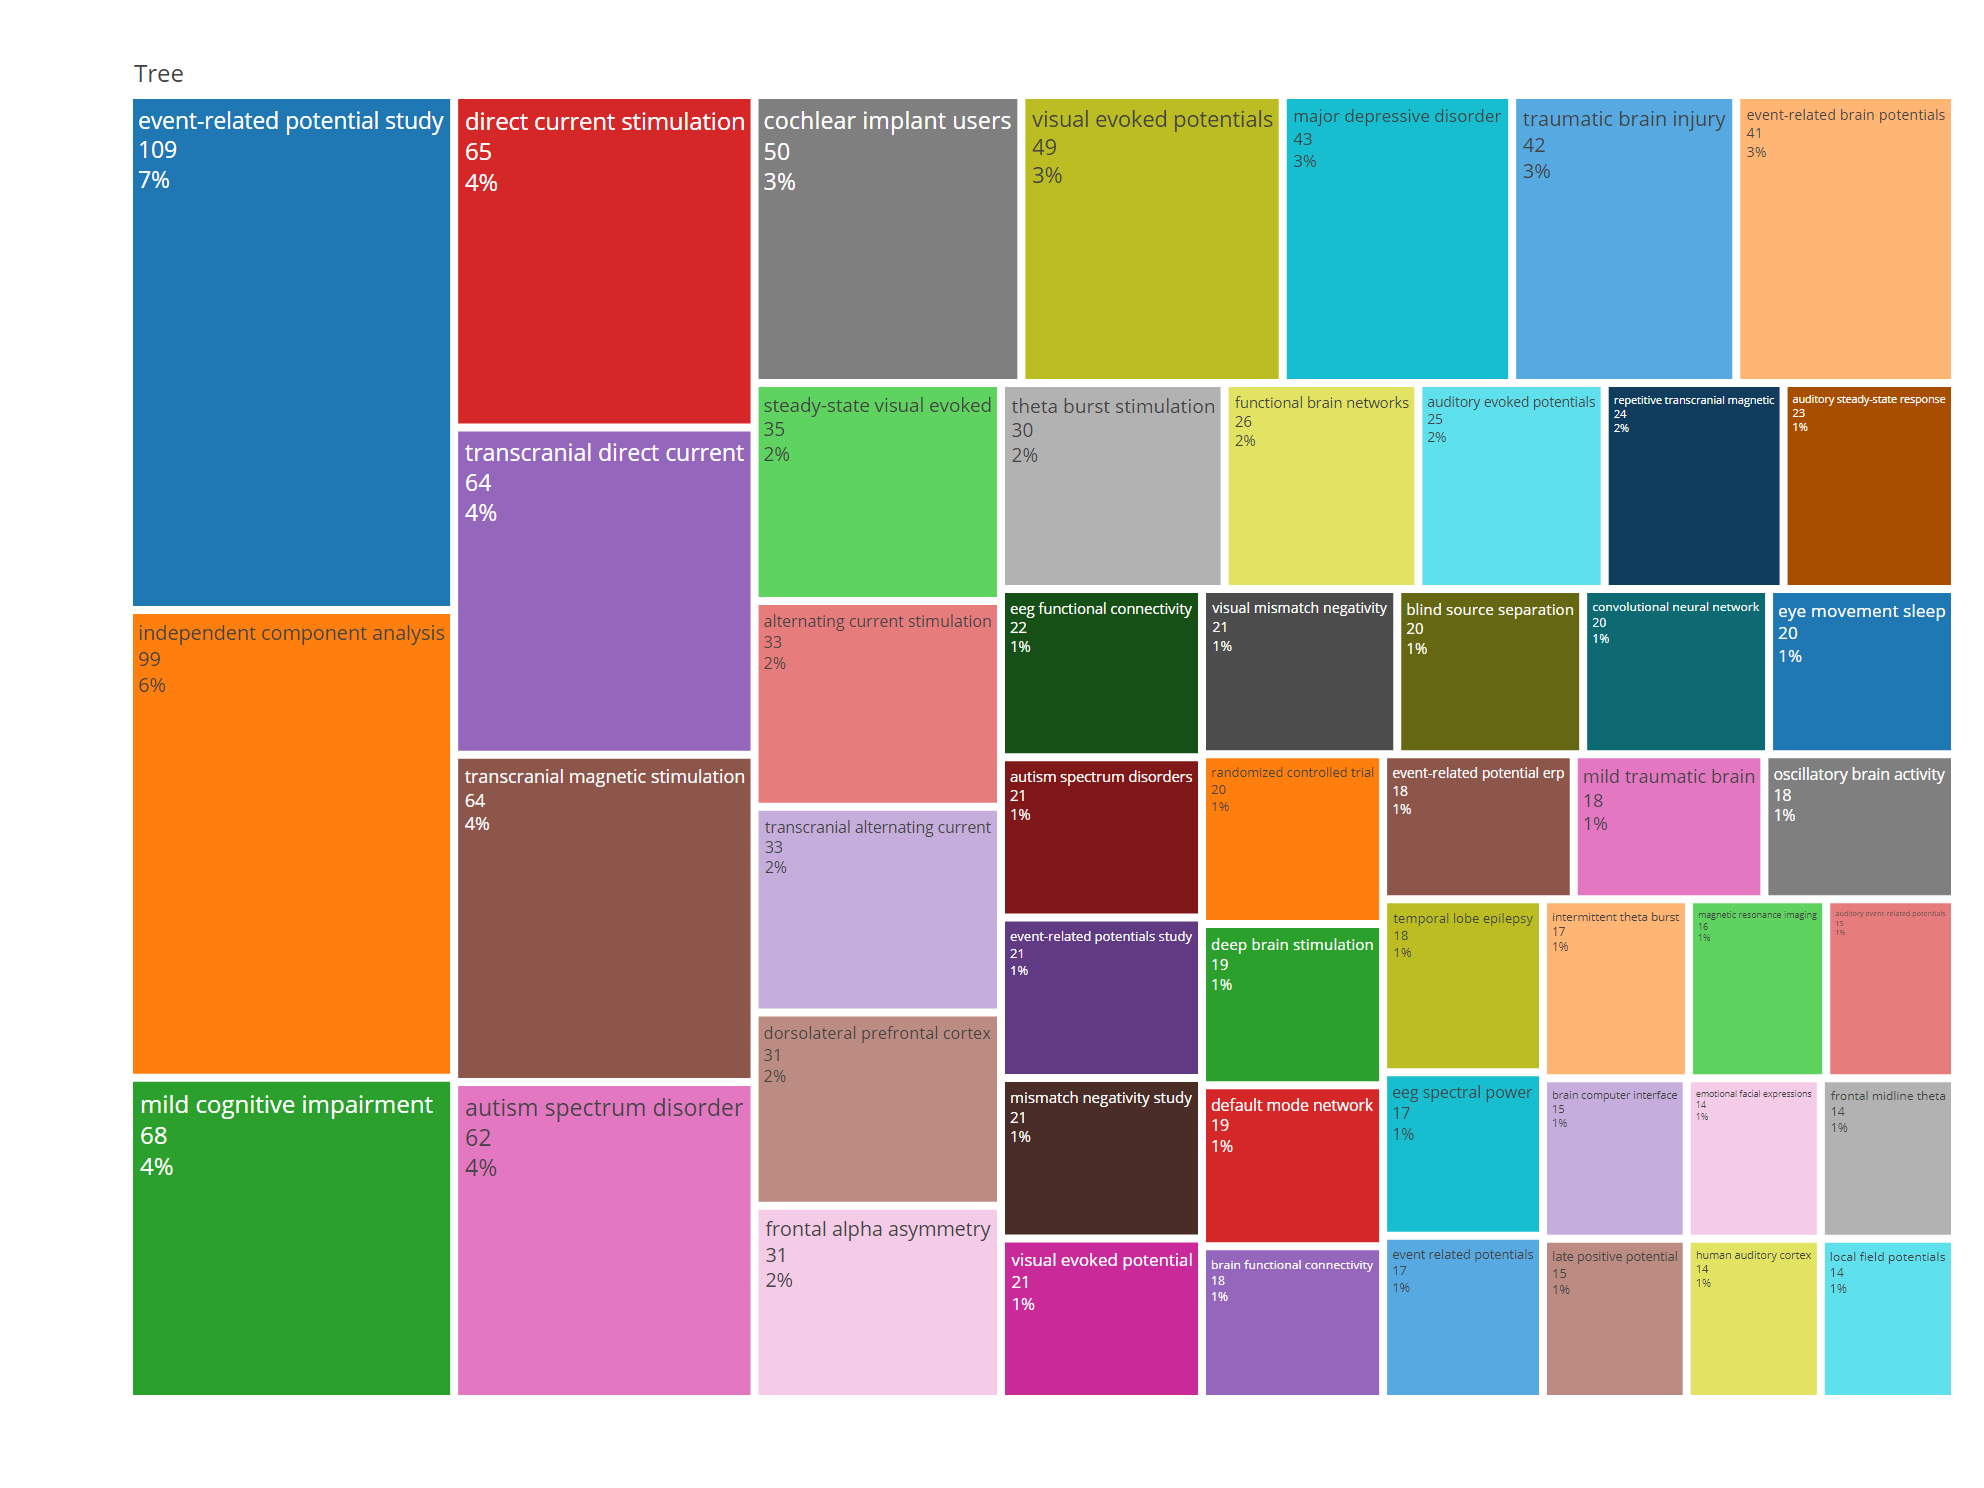


##

## Most Relevant Unigram words in Abstract


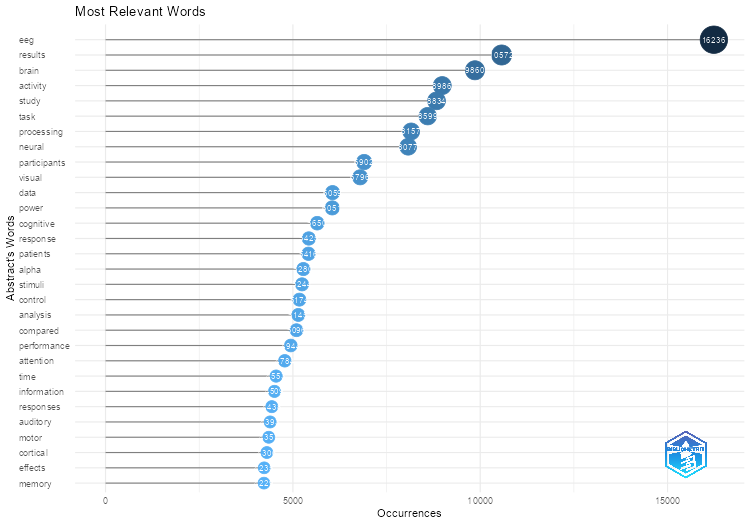


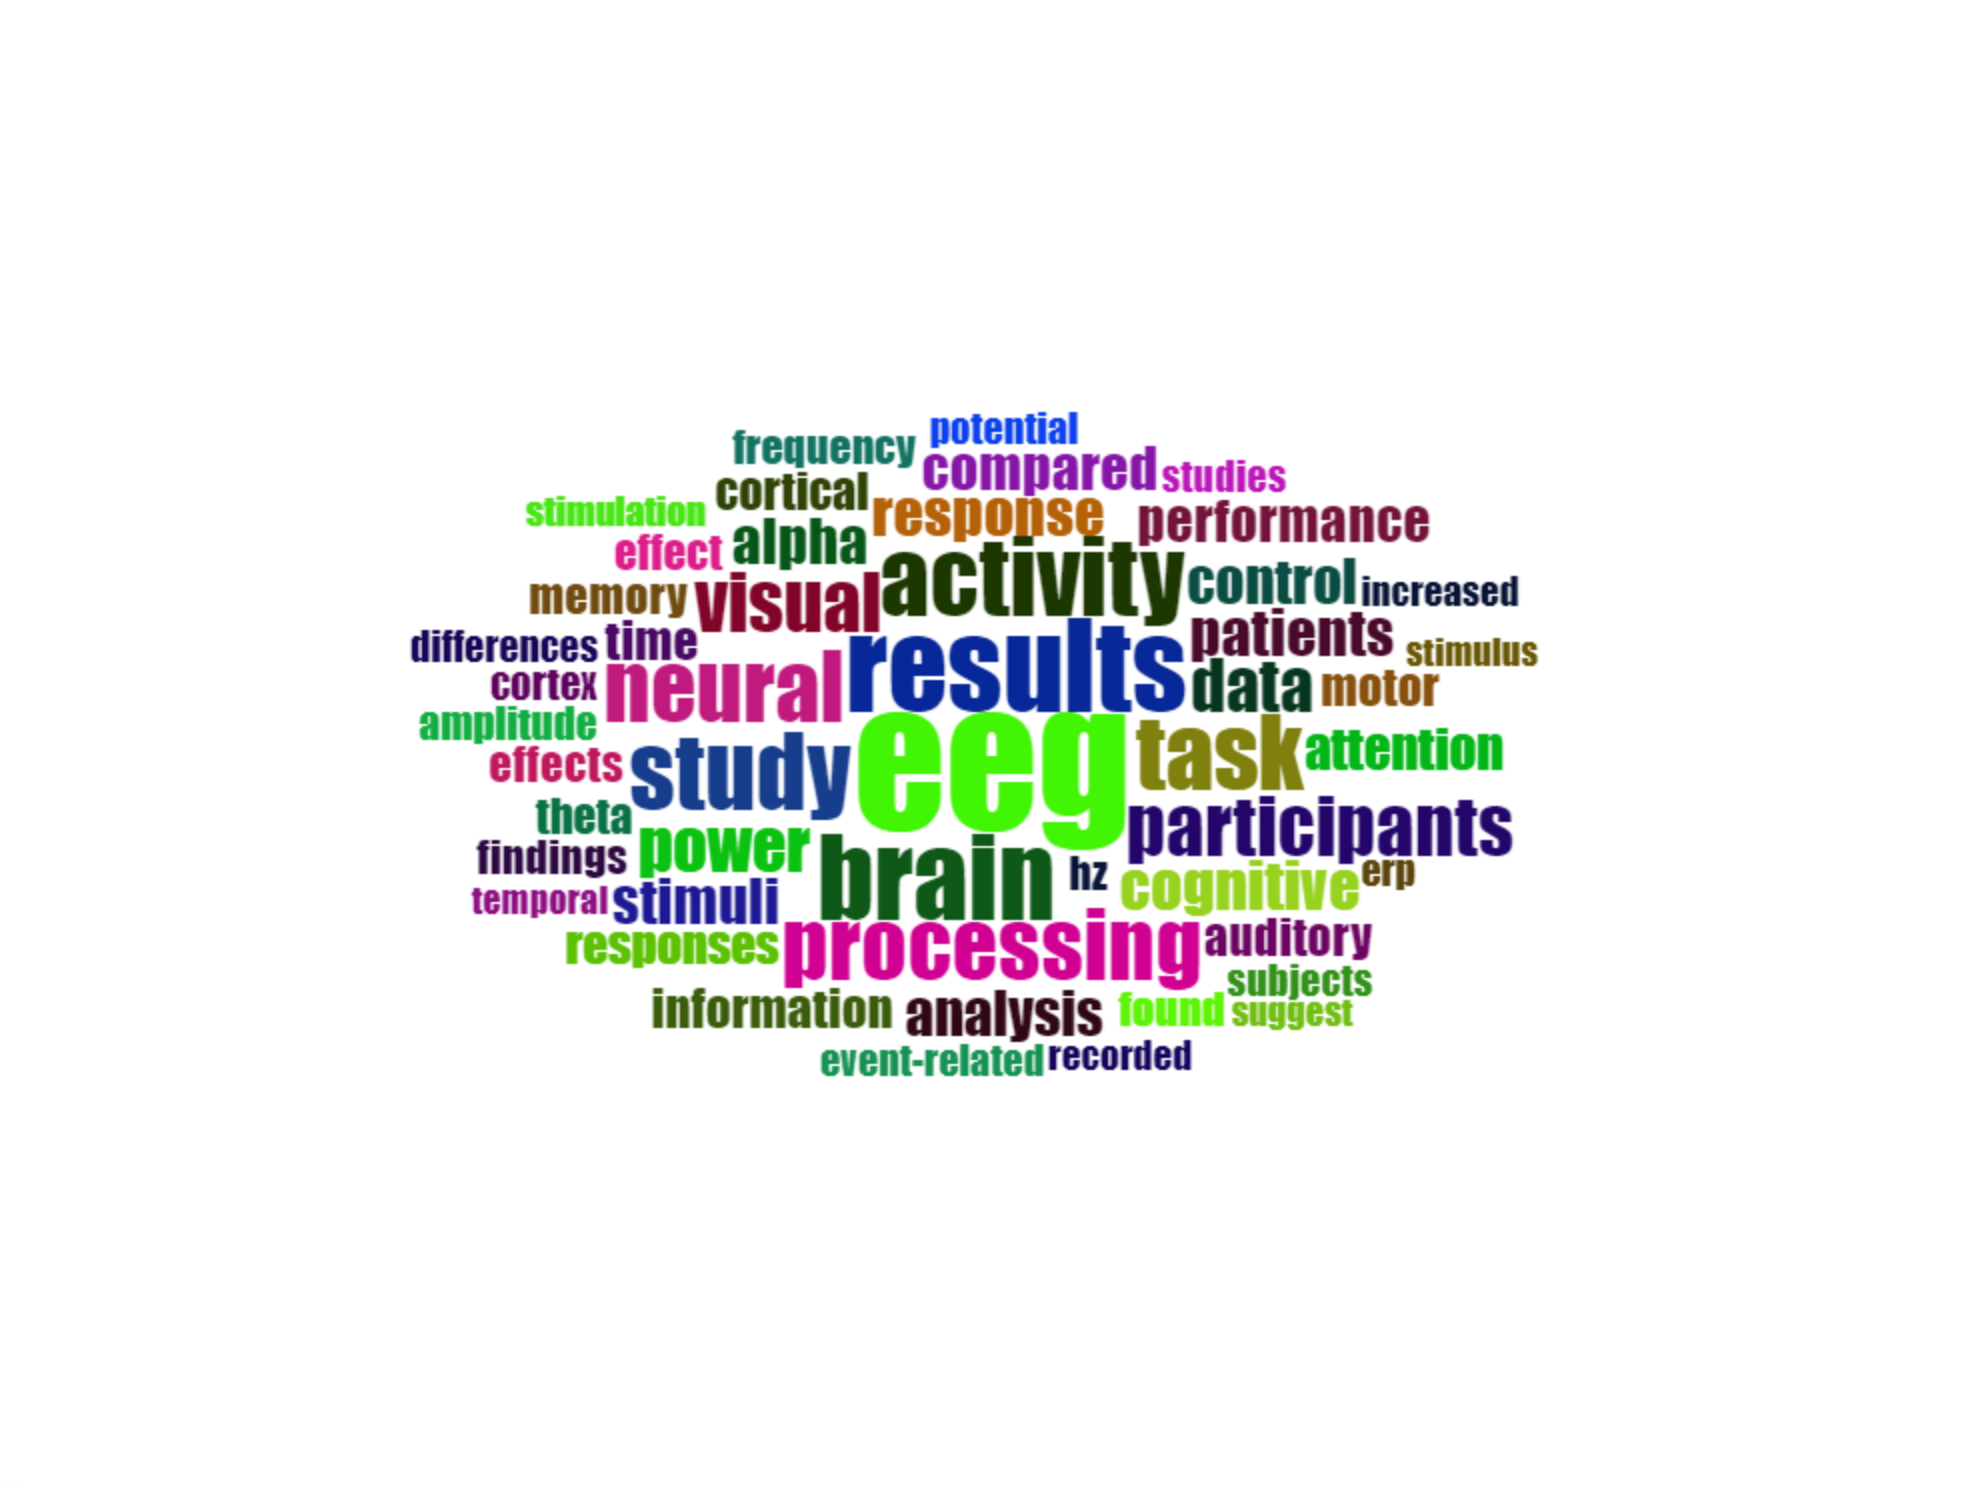


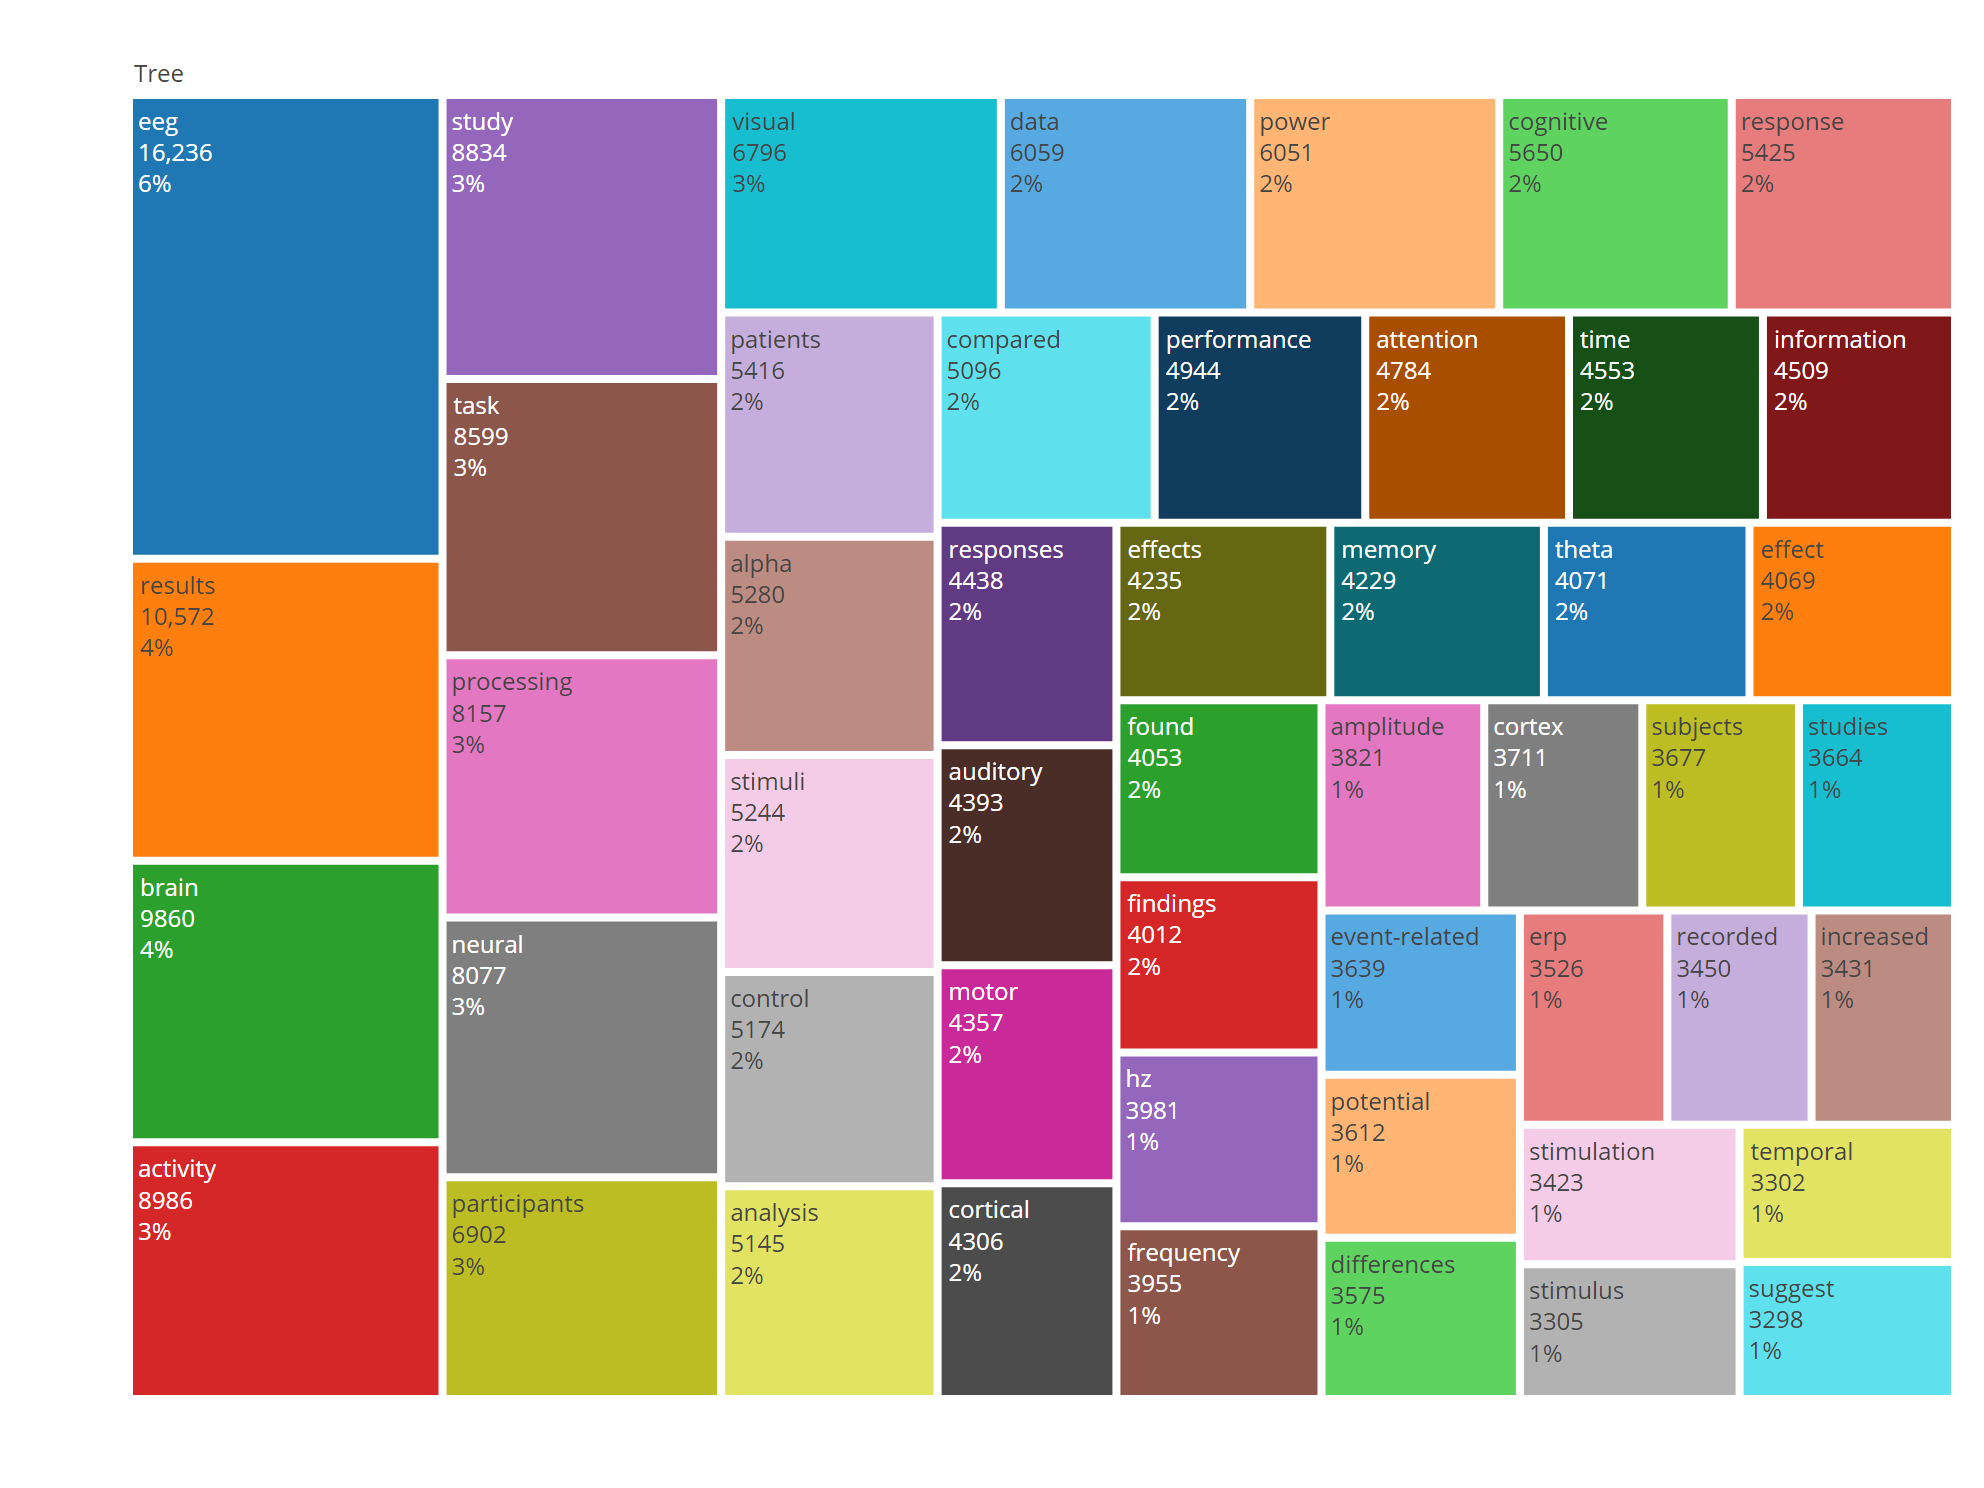


## Most Relevant Bigram words in Abstract


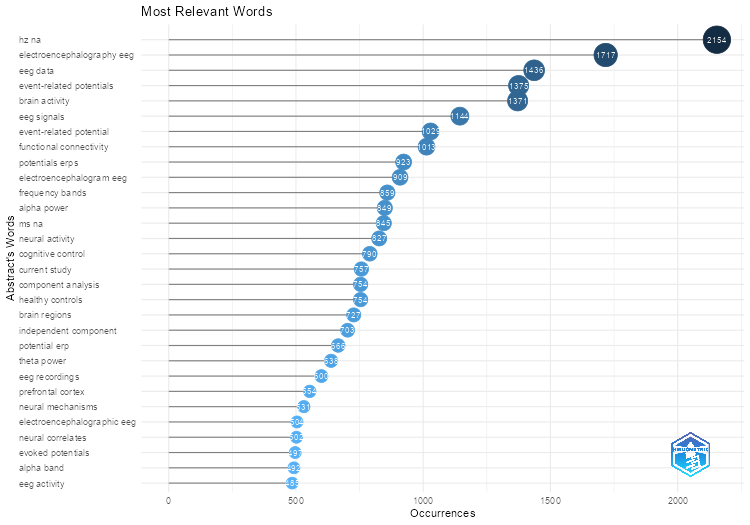


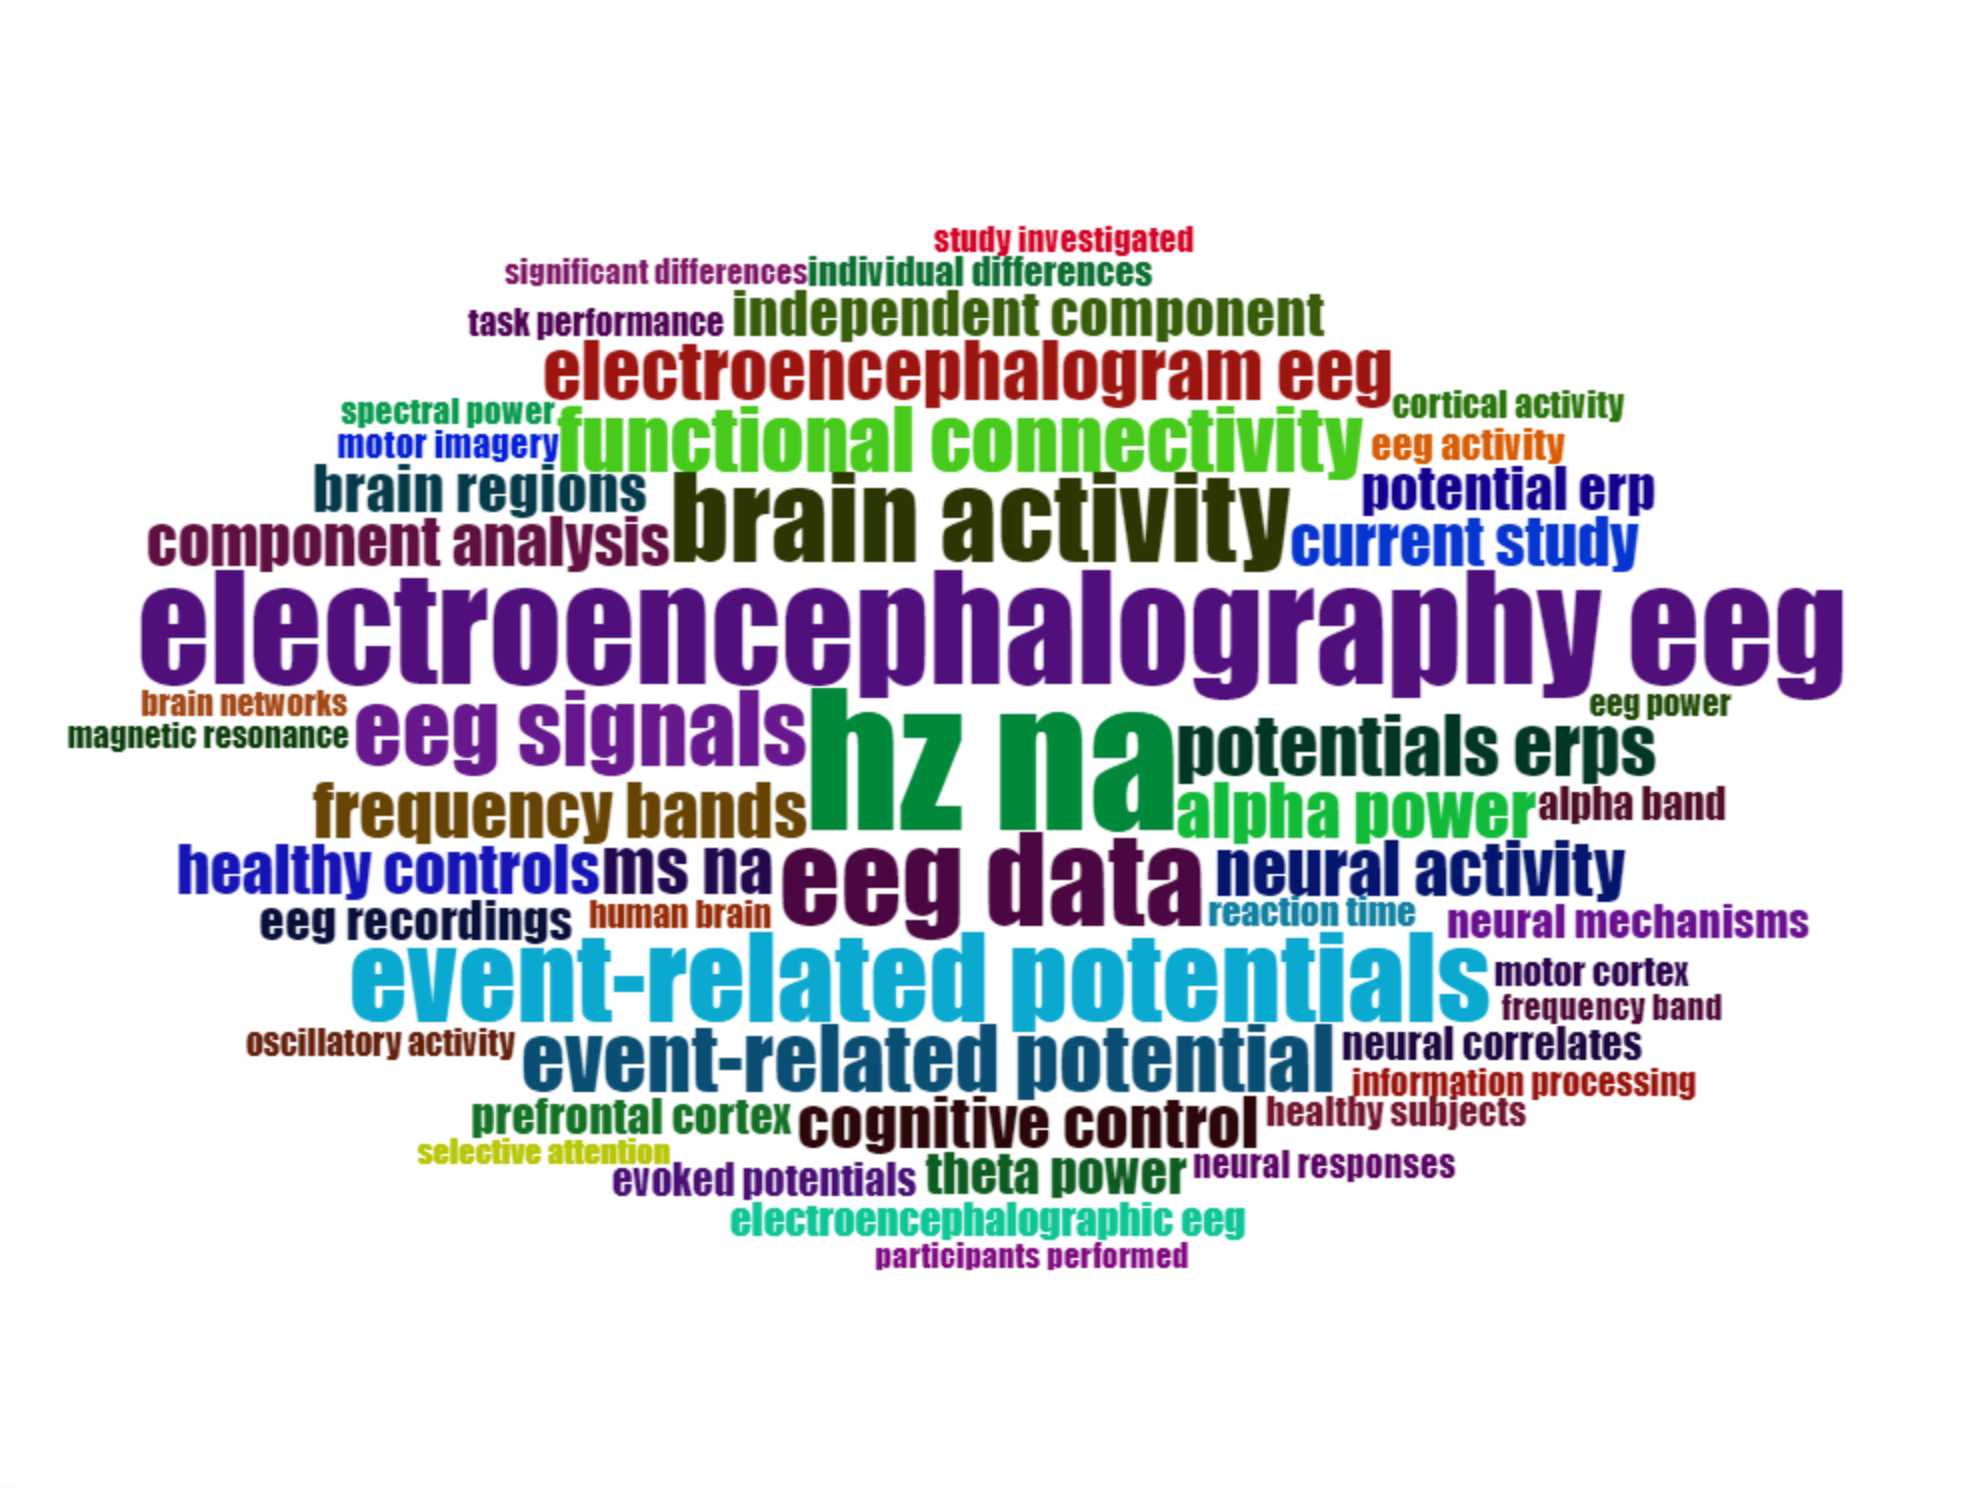

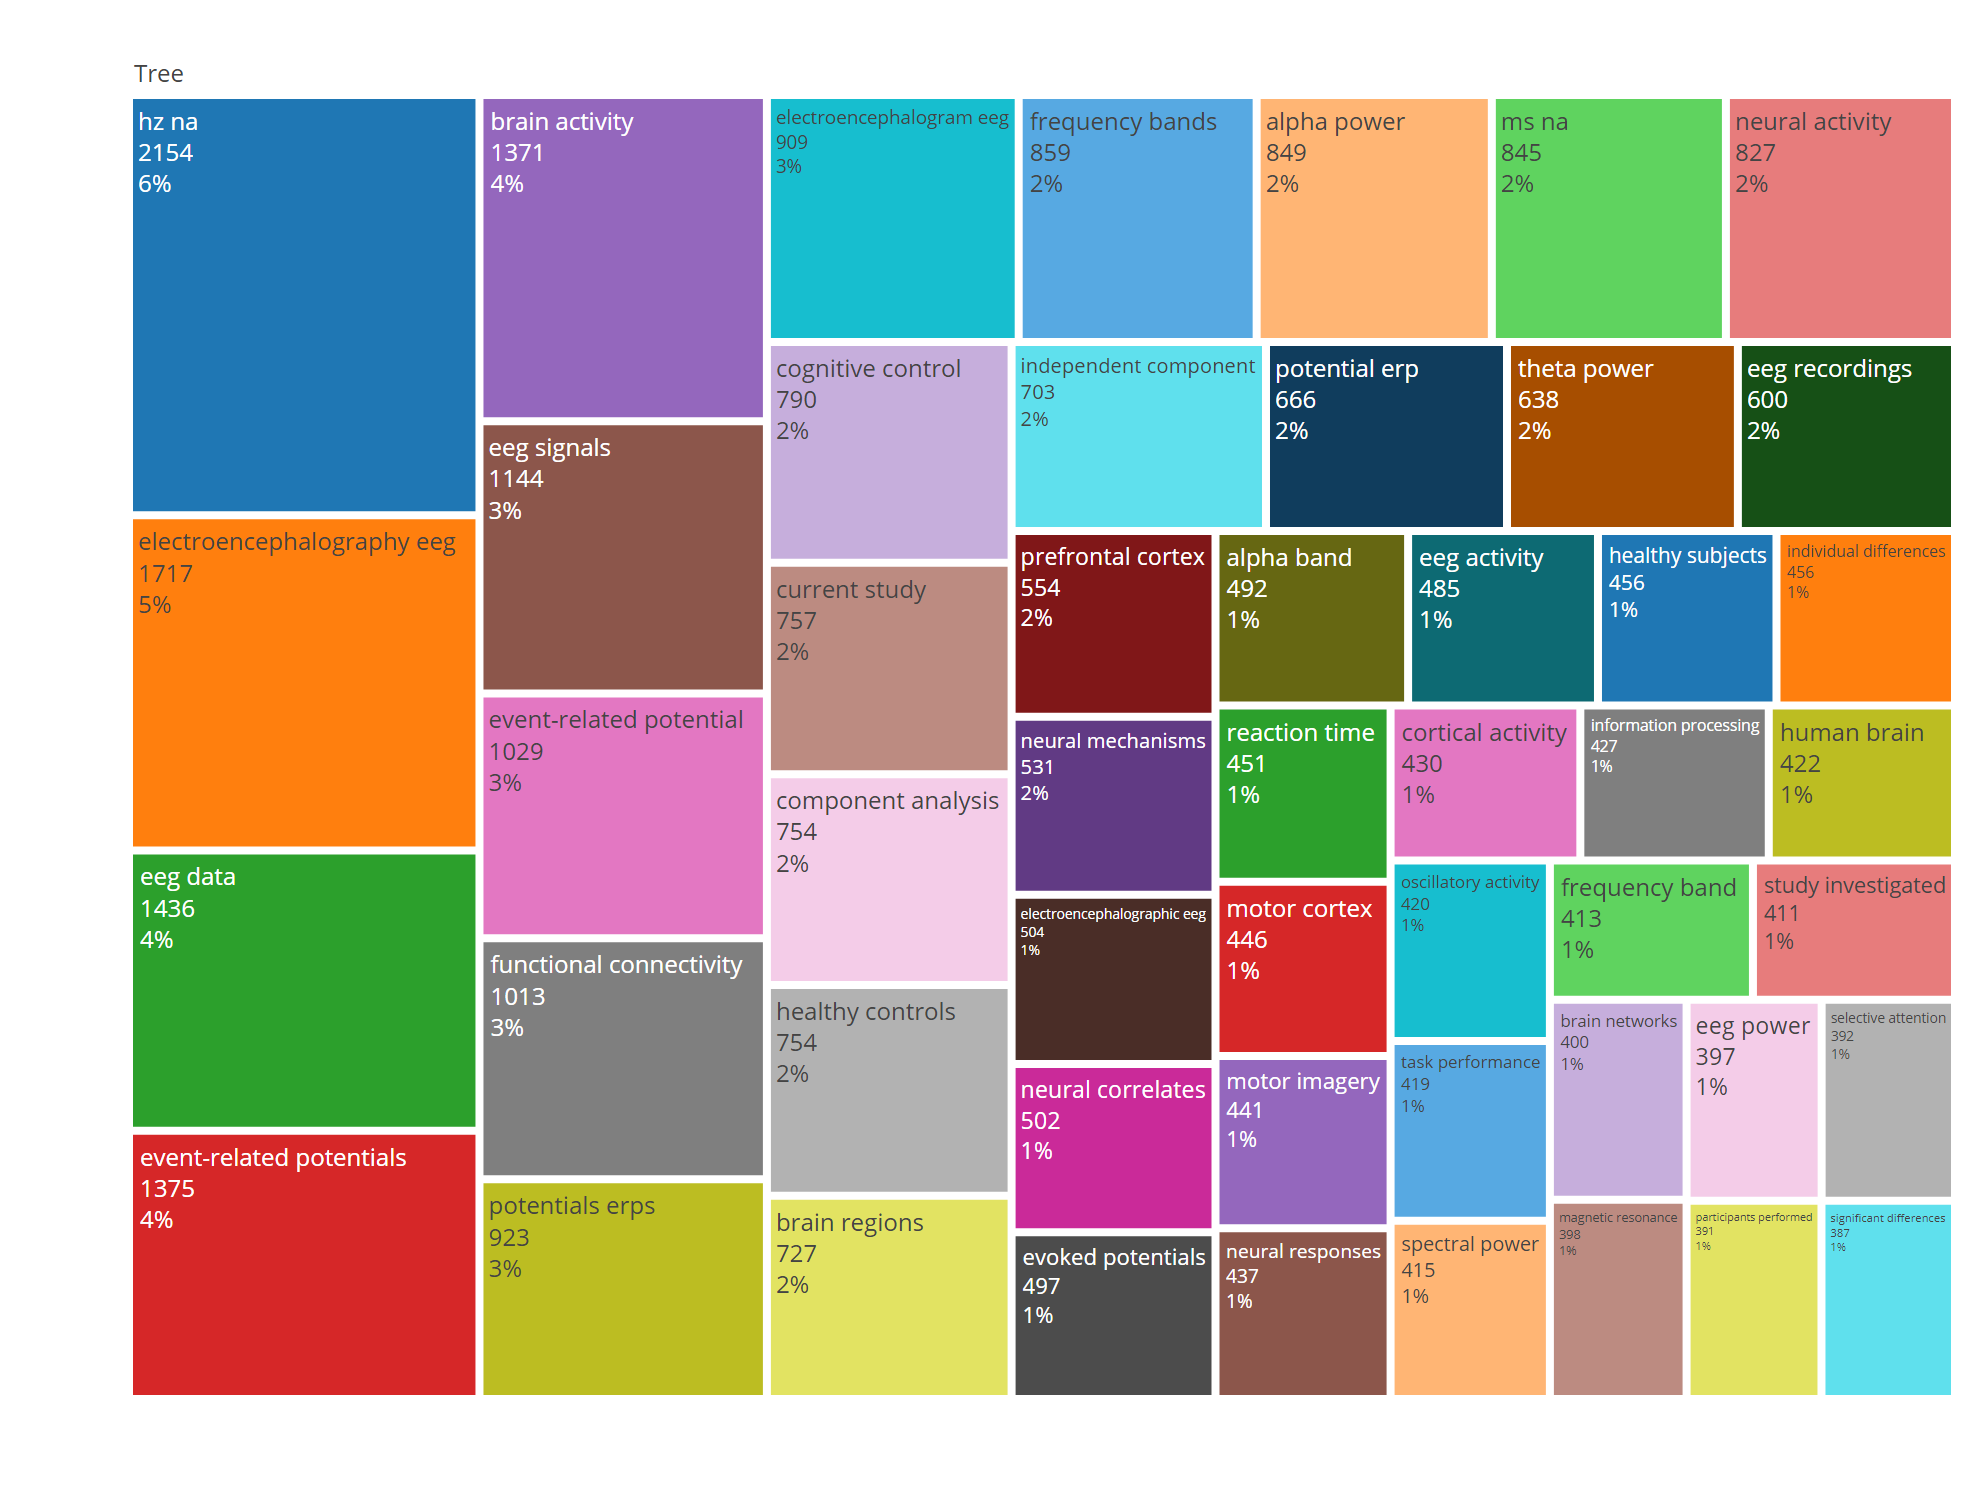


## Most Relevant Trigram words in Abstract


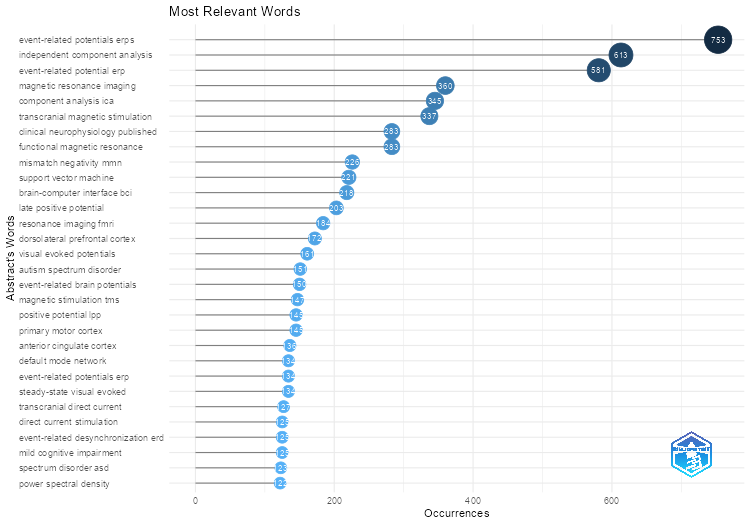


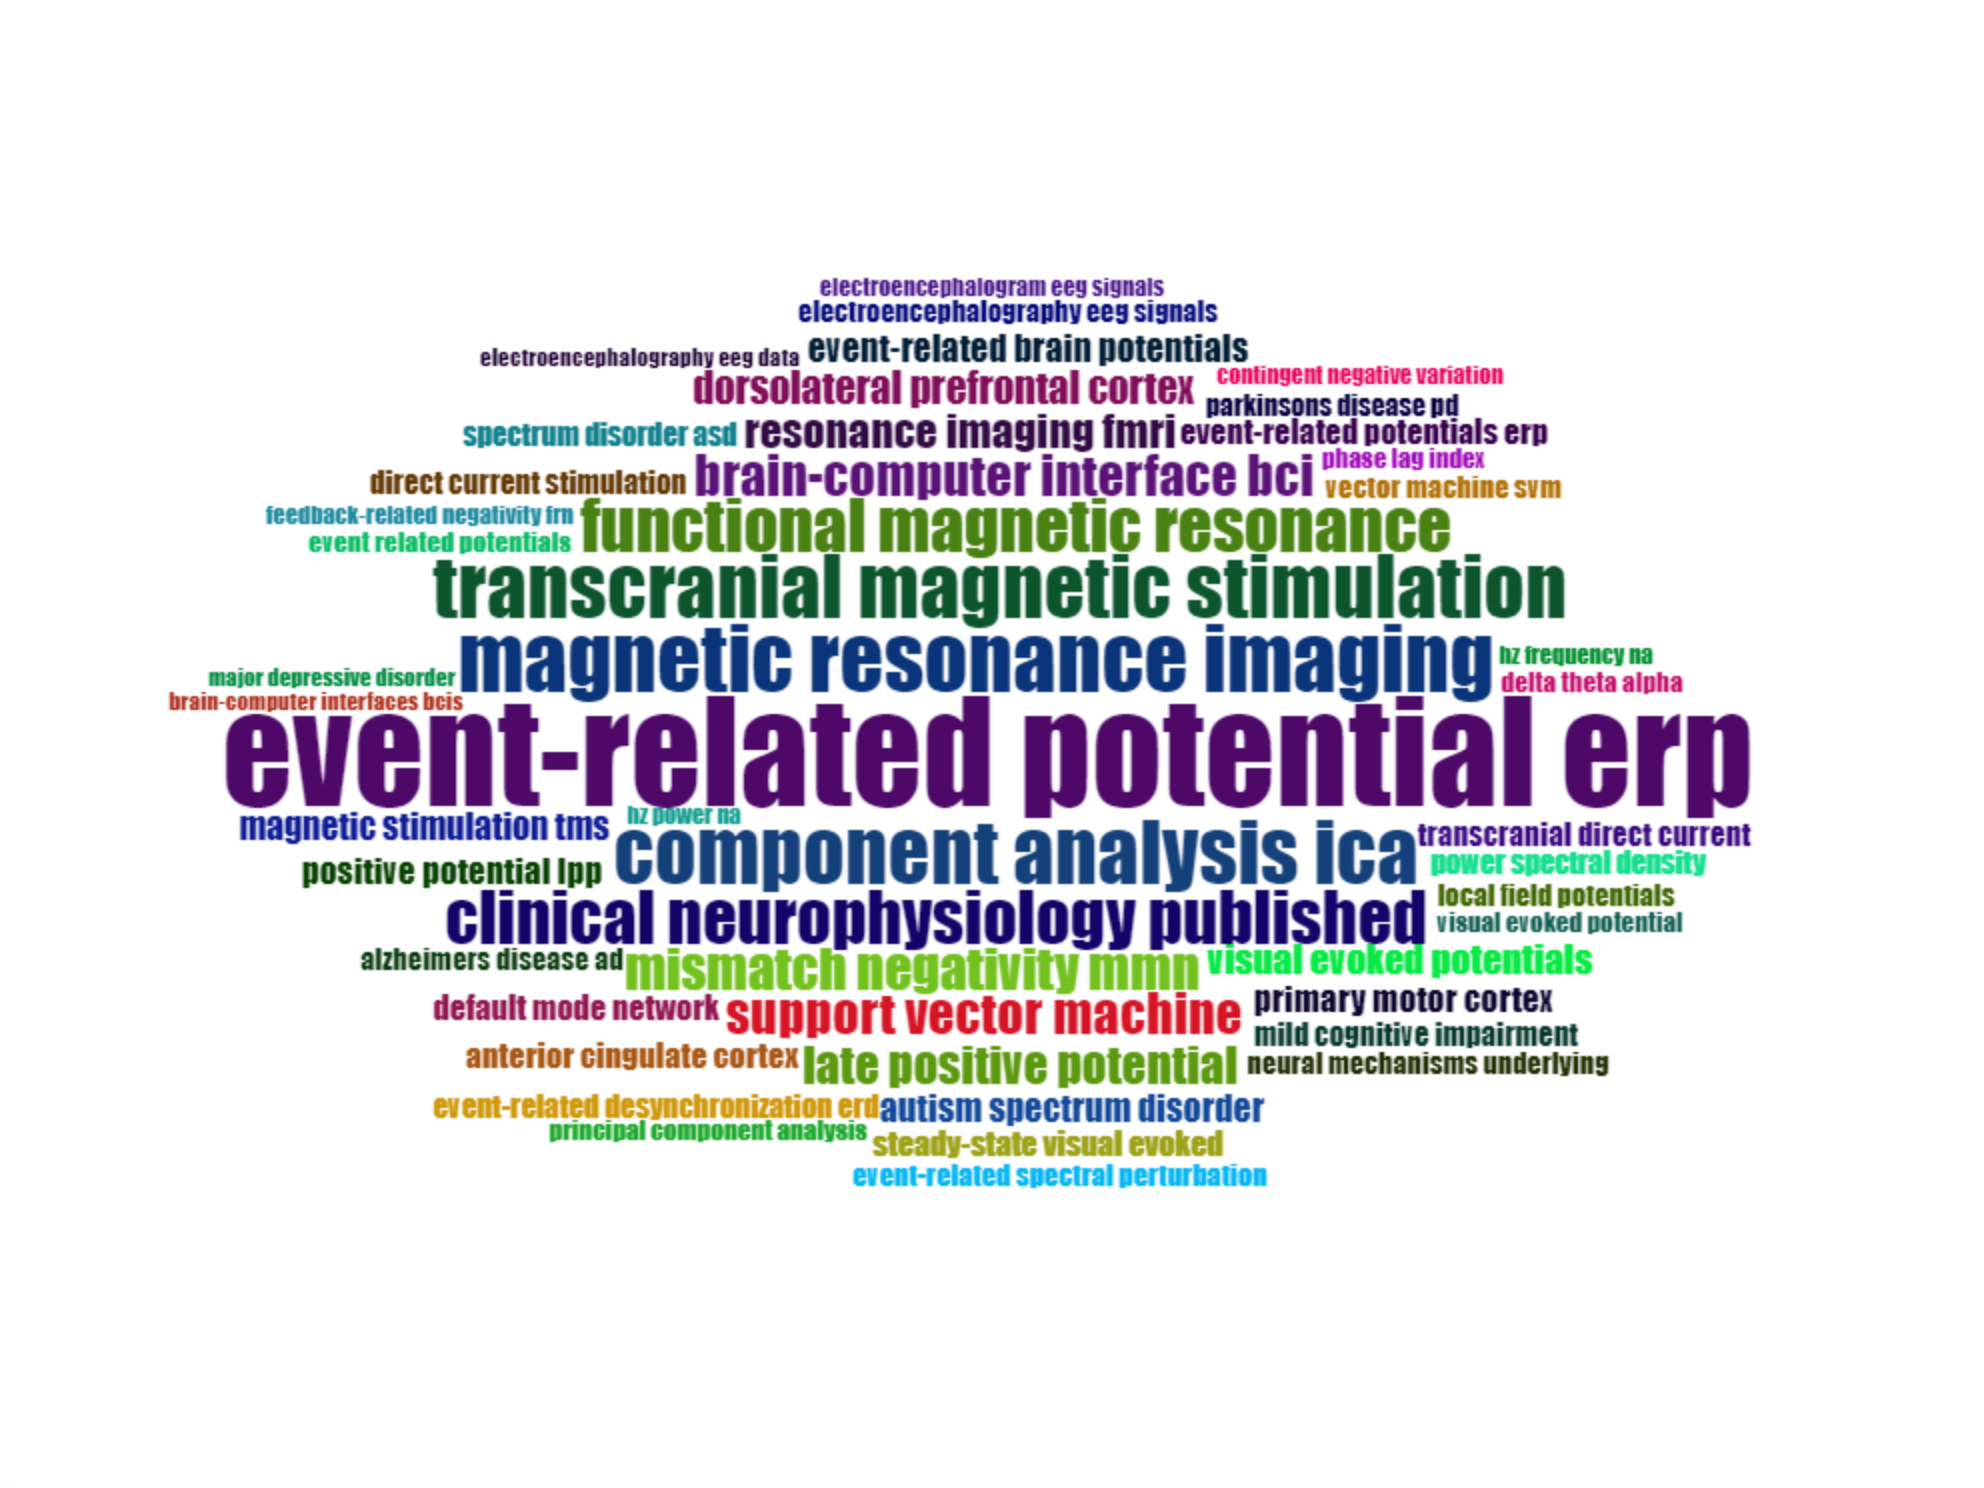

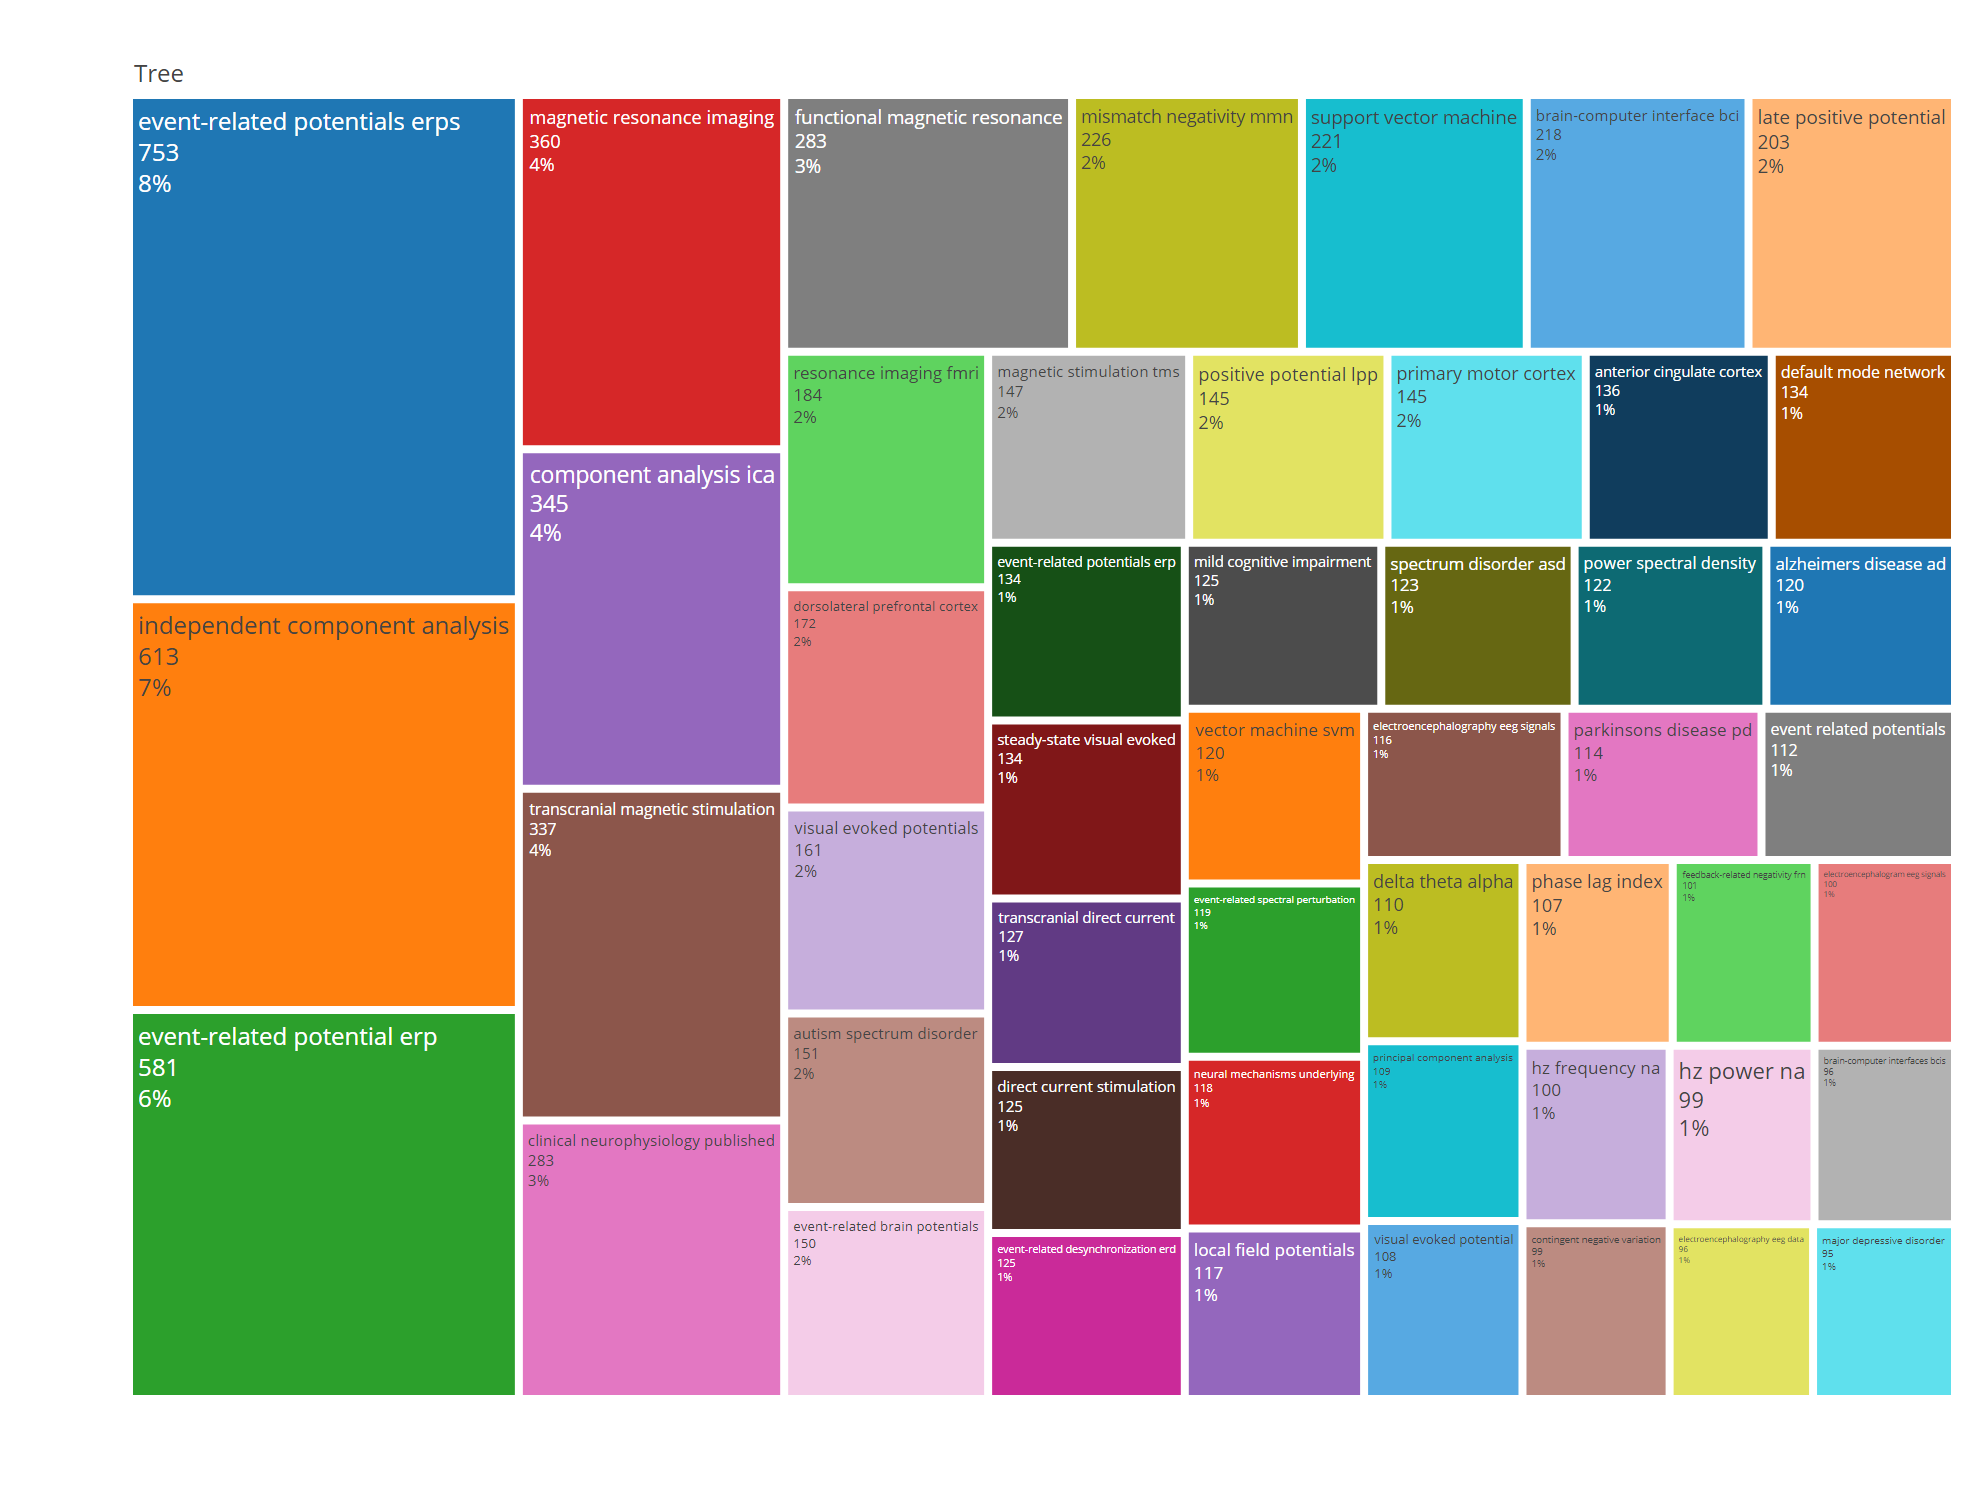


| **Rows** | **Keywords** | | | |
| --- | --- | --- | --- | --- |
| **Plus** | | **Authors** | |
| **Term** | **Freq** | **Term** | **Freq** |
| **1** | dynamics | 2,055 | eeg | 2,803 |
| **2** | eeg | 1,994 | electroencephalography | 1,125 |
| **3** | brain | 1,786 | erp | 633 |
| **4** | attention | 1,385 | attention | 544 |
| **5** | oscillations | 1,268 | event-related potentials | 524 |
| **6** | event-related potentials | 1,203 | electroencephalography (eeg) | 315 |
| **7** | cortex | 1,143 | erps | 294 |
| **8** | responses | 1,065 | working memory | 270 |
| **9** | perception | 1,018 | theta | 260 |
| **10** | performance | 872 | electroencephalogram | 248 |

| **Rows** | **Title** | | | | | |
| --- | --- | --- | --- | --- | --- | --- |
| **Unigram** | | **Bigram** | | **Trigram** | |
| **Term** | **Freq** | **Term** | **Freq** | **Term** | **Freq** |
| **1** | eeg | 2,336 | event-related potentials | 296 | event-related potential study | 109 |
| **2** | study | 1,360 | erp study | 247 | independent component analysis | 99 |
| **3** | neural | 1,321 | event-related potential | 228 | mild cognitive impairment | 68 |
| **4** | brain | 1,276 | functional connectivity | 198 | direct current stimulation | 65 |
| **5** | processing | 1,154 | eeg study | 173 | transcranial direct current | 64 |
| **6** | visual | 965 | neural correlates | 153 | transcranial magnetic stimulation | 64 |
| **7** | activity | 845 | brain activity | 145 | autism spectrum disorder | 62 |
| **8** | memory | 747 | motor imagery | 138 | cochlear implant users | 50 |
| **9** | evidence | 727 | brain-computer interface | 132 | visual evoked potentials | 49 |
| **10** | event-related | 707 | parkinsons disease | 132 | major depressive disorder | 43 |

| **Rows** | **Abstract** | | | | | |
| --- | --- | --- | --- | --- | --- | --- |
| **Unigram** | | **Bigram** | | **Trigram** | |
| **Term** | **Freq** | **Term** | **Freq** | **Term** | **Freq** |
| **1** | eeg | 16,236 | hz na | 2,154 | event-related potentials erps | 753 |
| **2** | results | 10,572 | electroencephalography eeg | 1,717 | independent component analysis | 613 |
| **3** | brain | 9,860 | eeg data | 1,436 | event-related potential erp | 581 |
| **4** | activity | 8,986 | event-related potentials | 1,375 | magnetic resonance imaging | 360 |
| **5** | study | 8,834 | brain activity | 1,371 | component analysis ica | 345 |
| **6** | task | 8,599 | eeg signals | 1,144 | transcranial magnetic stimulation | 337 |
| **7** | processing | 8,157 | event-related potential | 1,029 | clinical neurophysiology published | 283 |
| **8** | neural | 8,077 | functional connectivity | 1,013 | functional magnetic resonance | 283 |
| **9** | participants | 6,902 | potentials erps | 923 | mismatch negativity mmn | 226 |
| **10** | visual | 6,796 | electroencephalogram eeg | 909 | support vector machine | 221 |

The time trend of them are avaiable.

## Trend Topic of Author Keywords


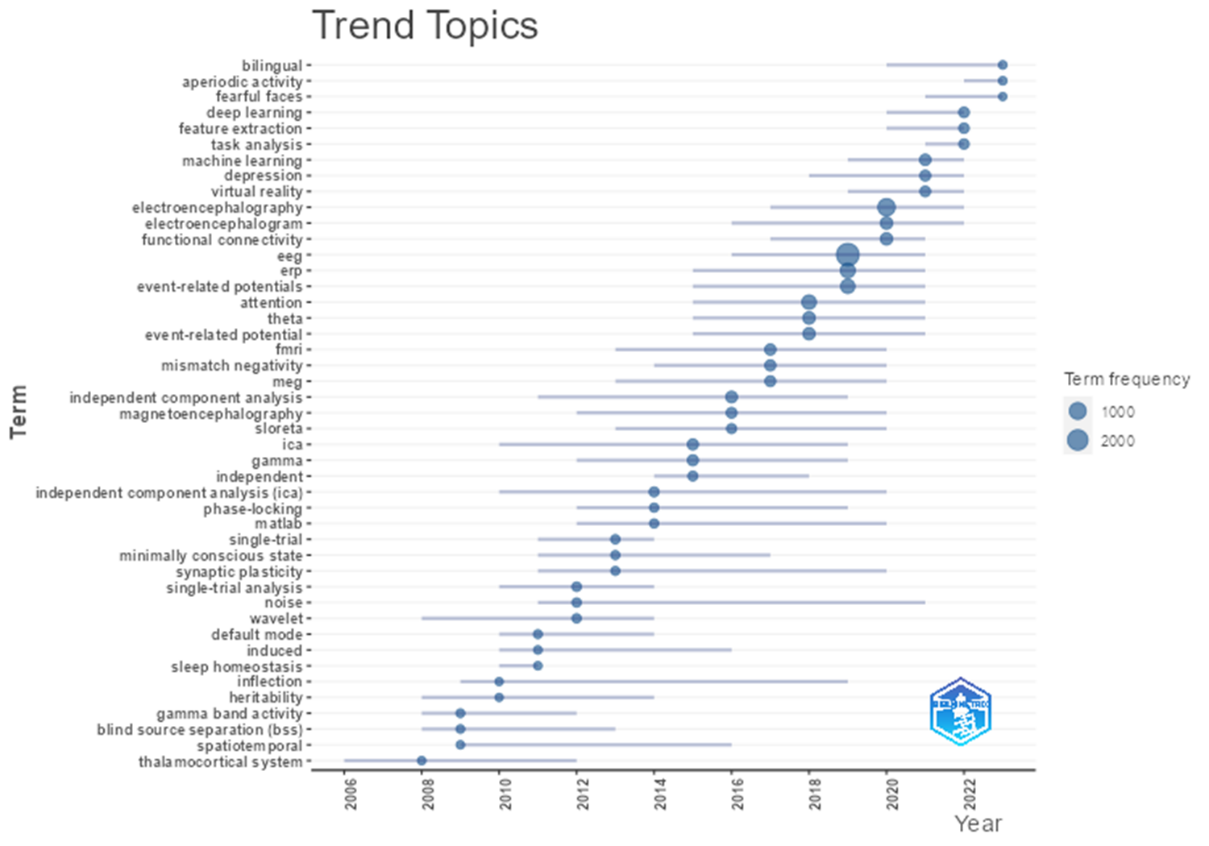


The Reference Publication Year Spectroscopy (RPYS) [1] are presented in the figure-1. The years before 1900 are omitted because the number of them is very neglect. The peak at 2004 is related to the [2] with about 32.4% of all 39,155 references in 2004. And the highest peaks is in 2012 and 2014 with 40,360 and 40,431 references, respectively. The decline in the graph shows after 2014.


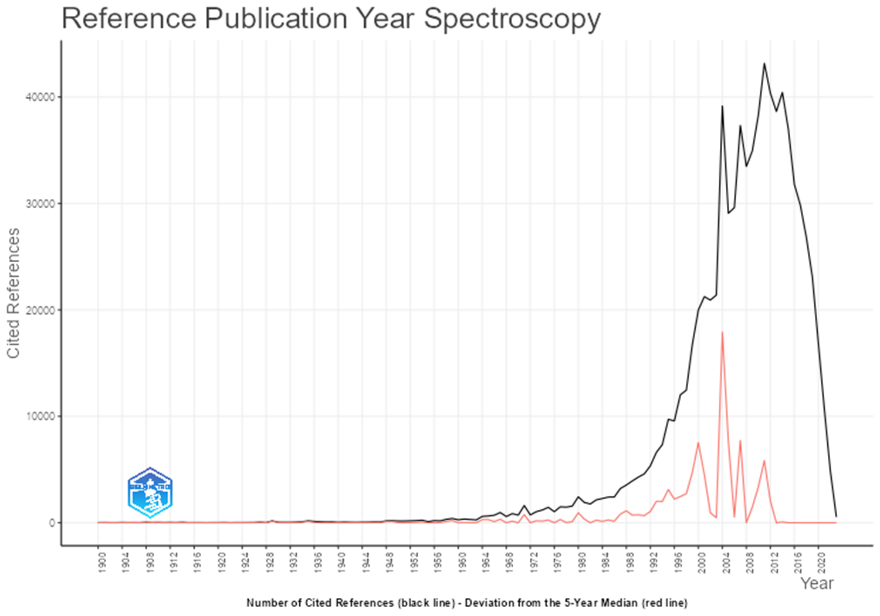


# Conceptual Structure

## Co-Occurrence Network of Keyword Plus


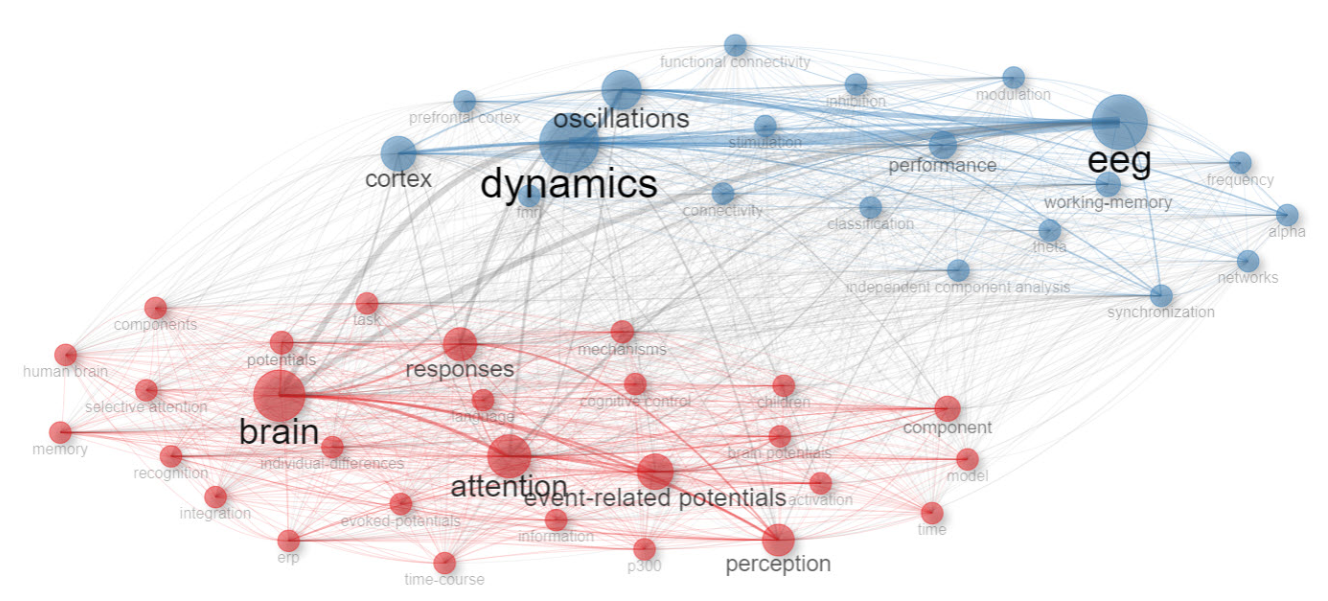


## Co-Occurrence Network of Author Keyword


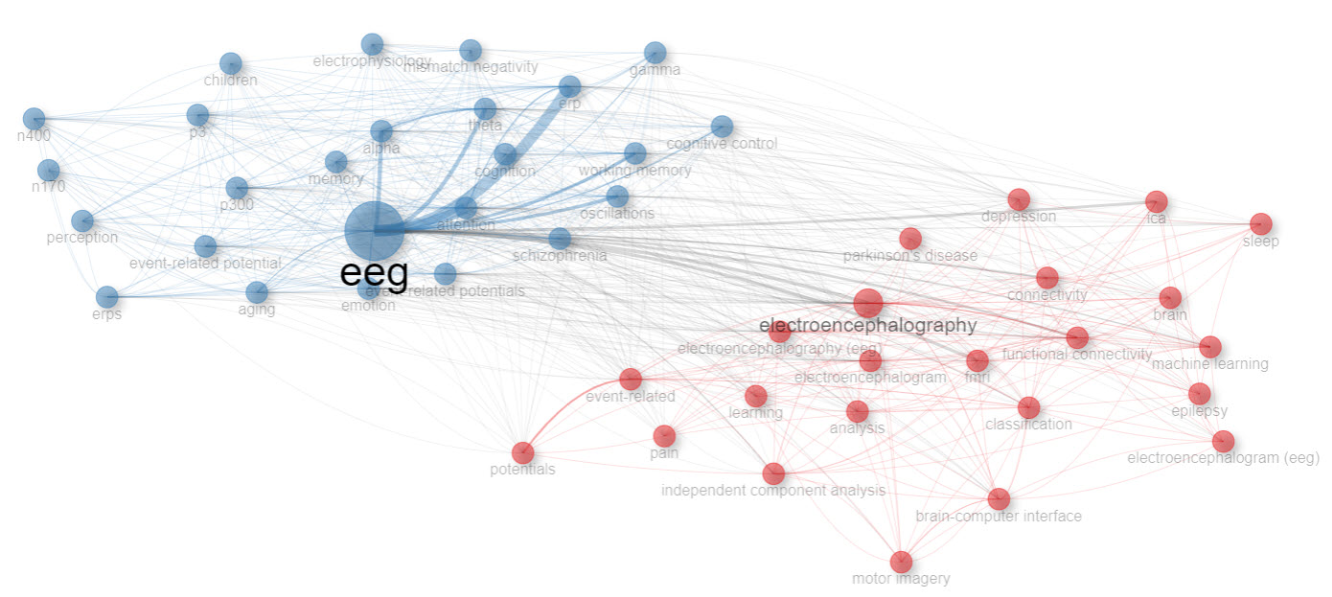


## Co-Occurrence Network of Unigram words in Title


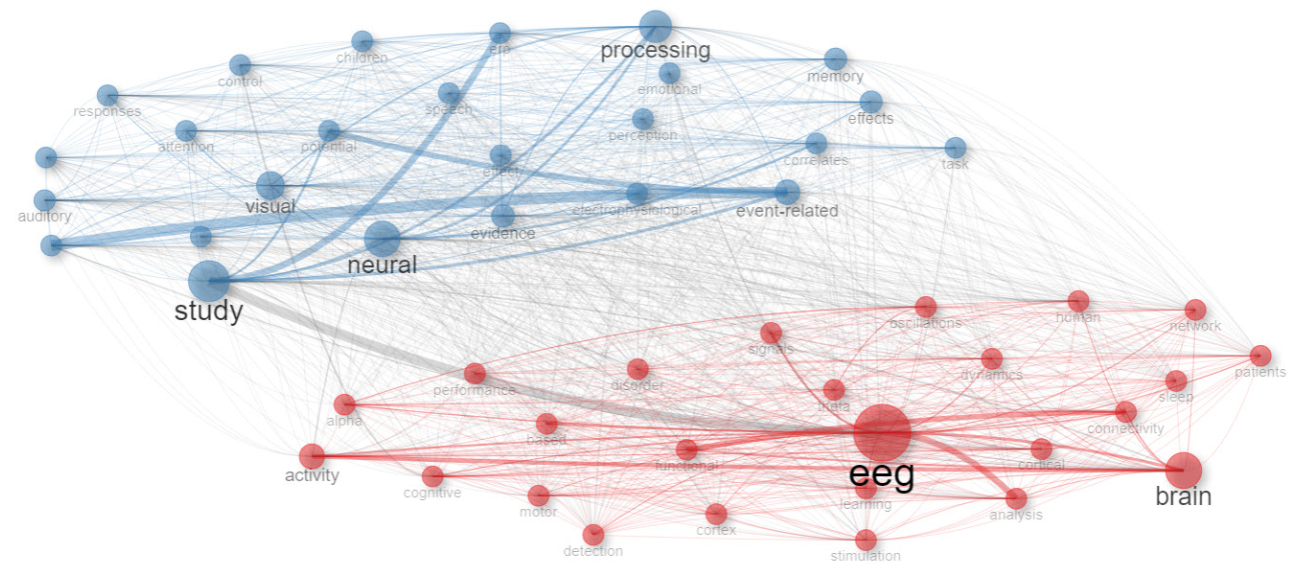


## Co-Occurrence Network of Bigram words in Title


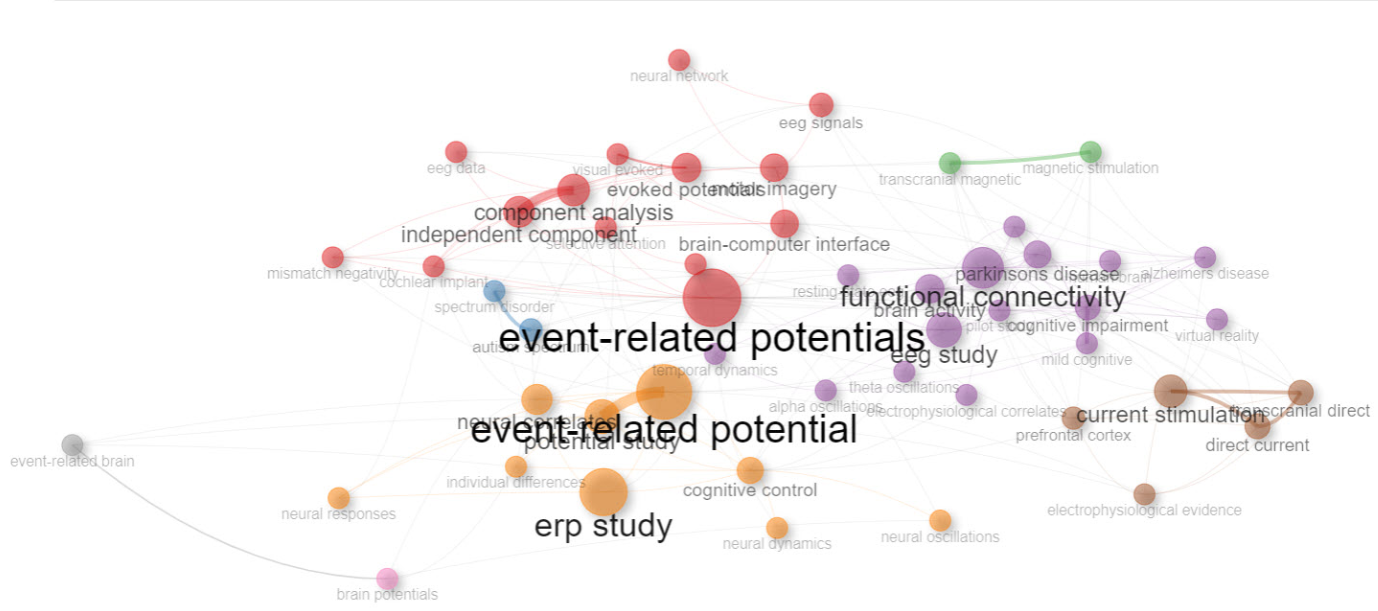


## Co-Occurrence Network of Trigram words in Title


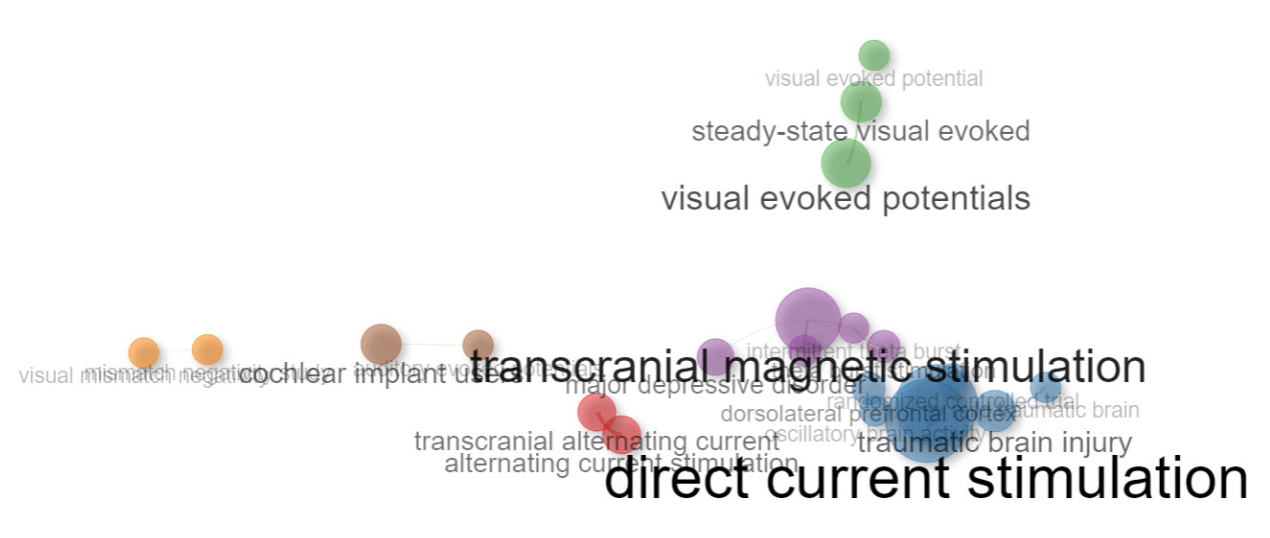


## Co-Occurrence Network of Unigram words in Abstract


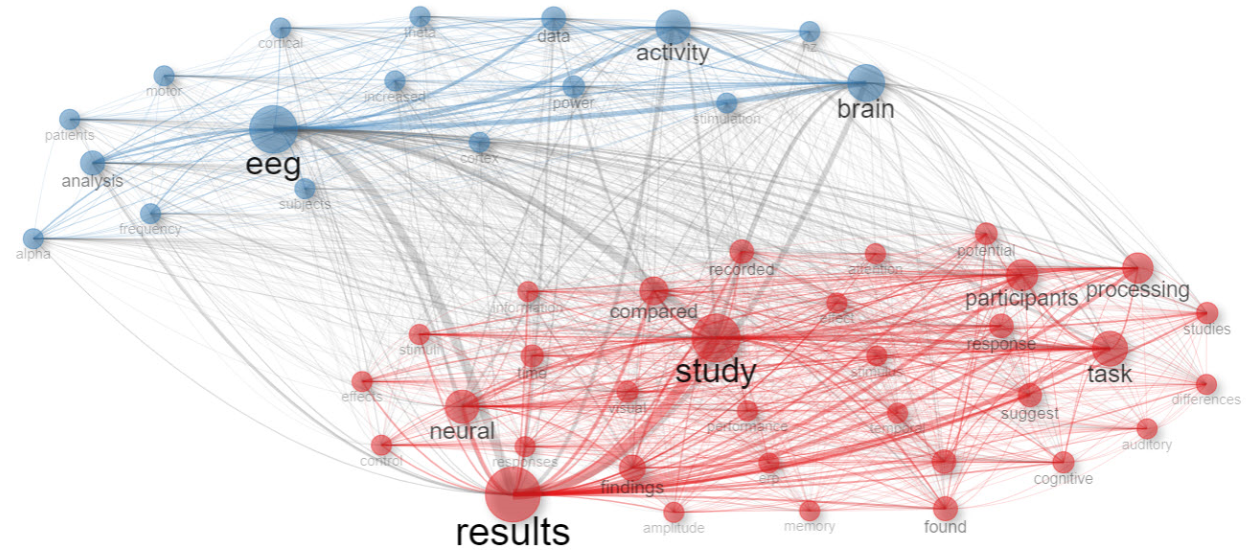


## Co-Occurrence Network of Bigram words in Abstract


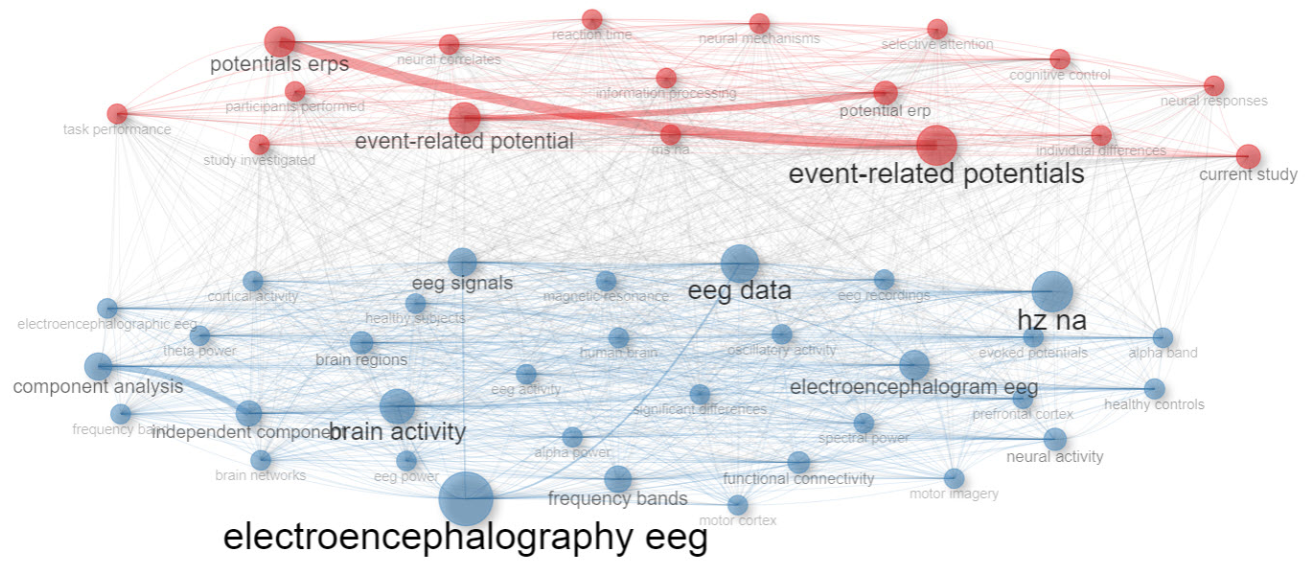


## Co-Occurrence Network of Trigram words in Abstract


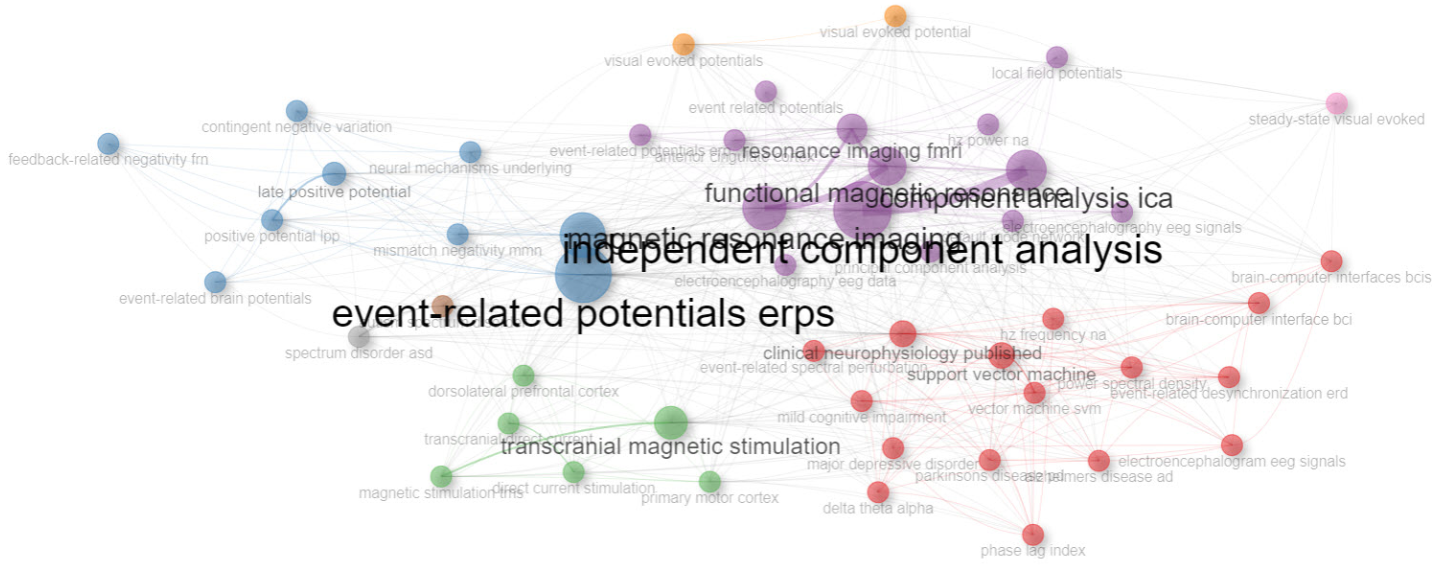


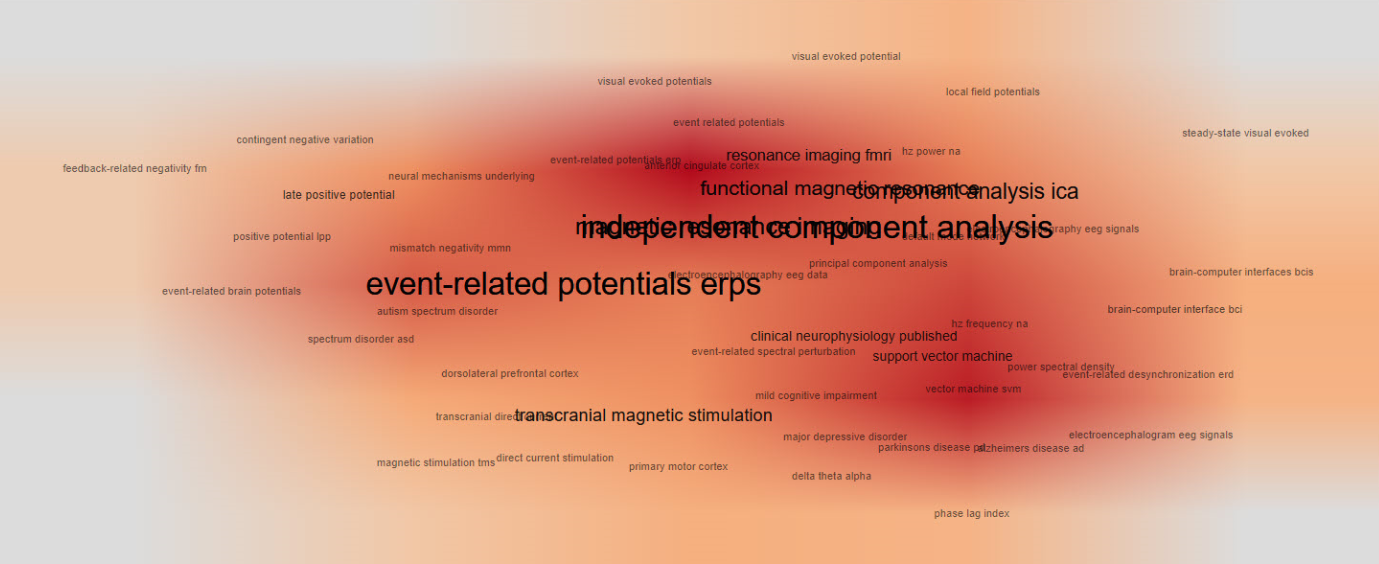


# Thematic Map

## Thematic Map Keyword Plus


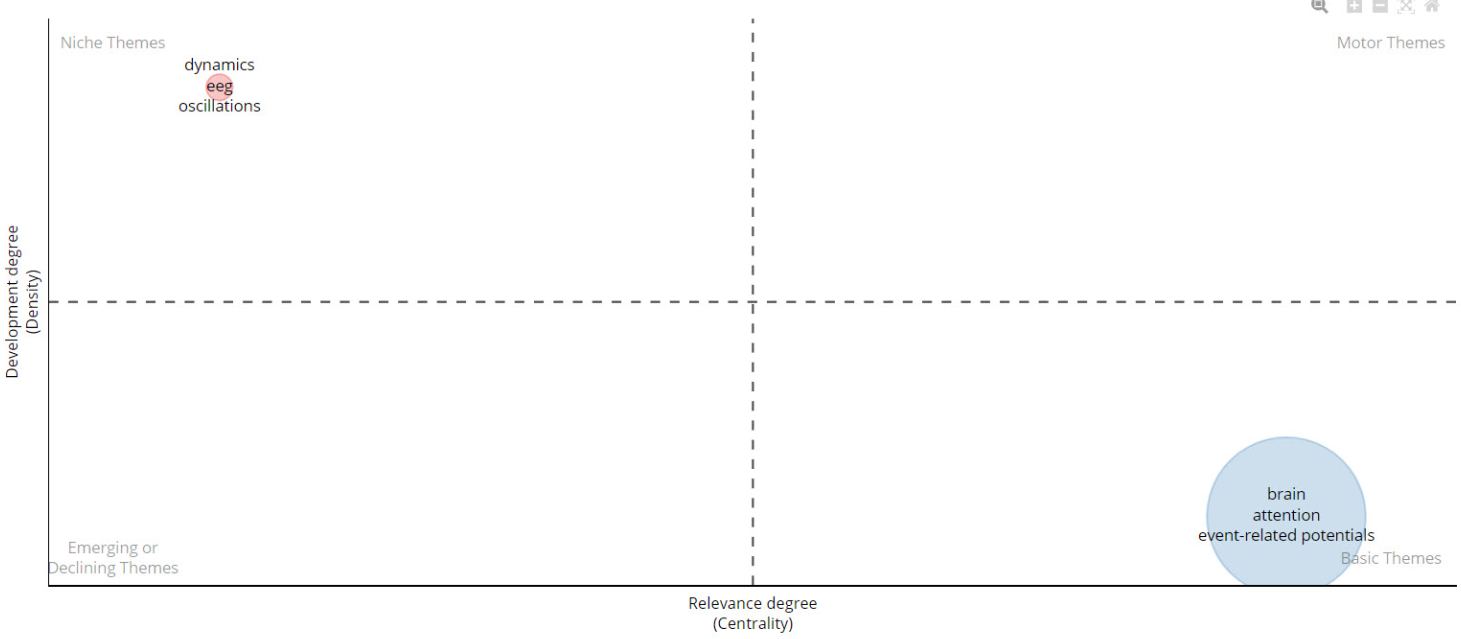


## Thematic Network Keyword Plus


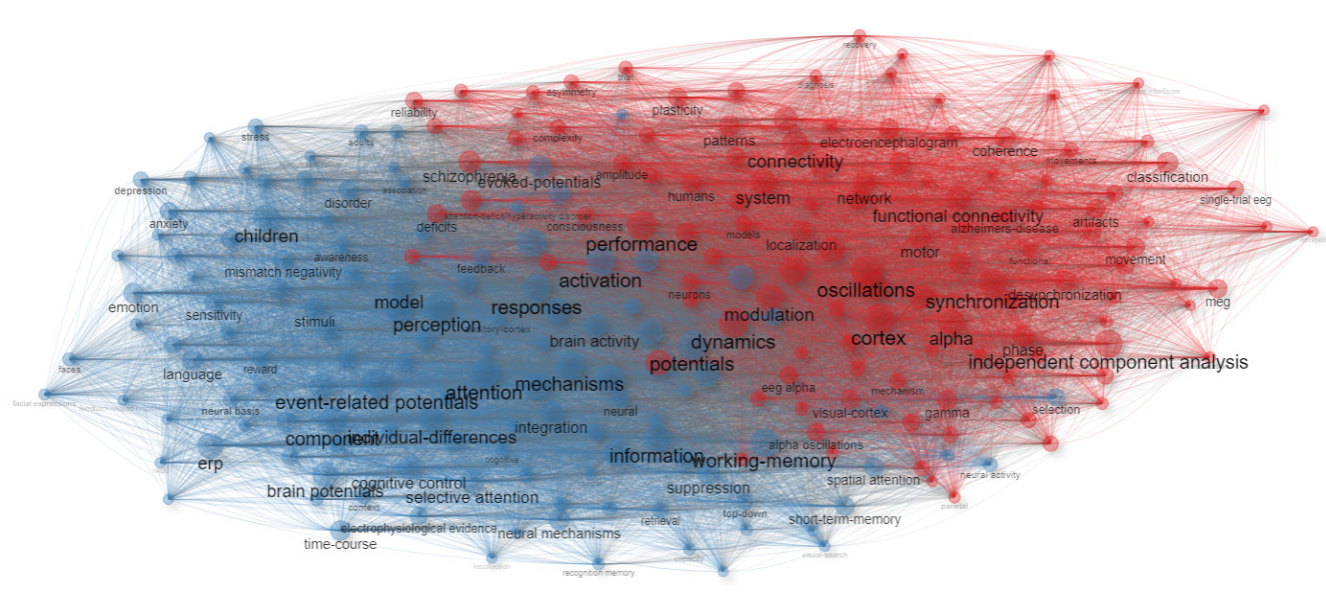


## Thematic Map Authors Keyword


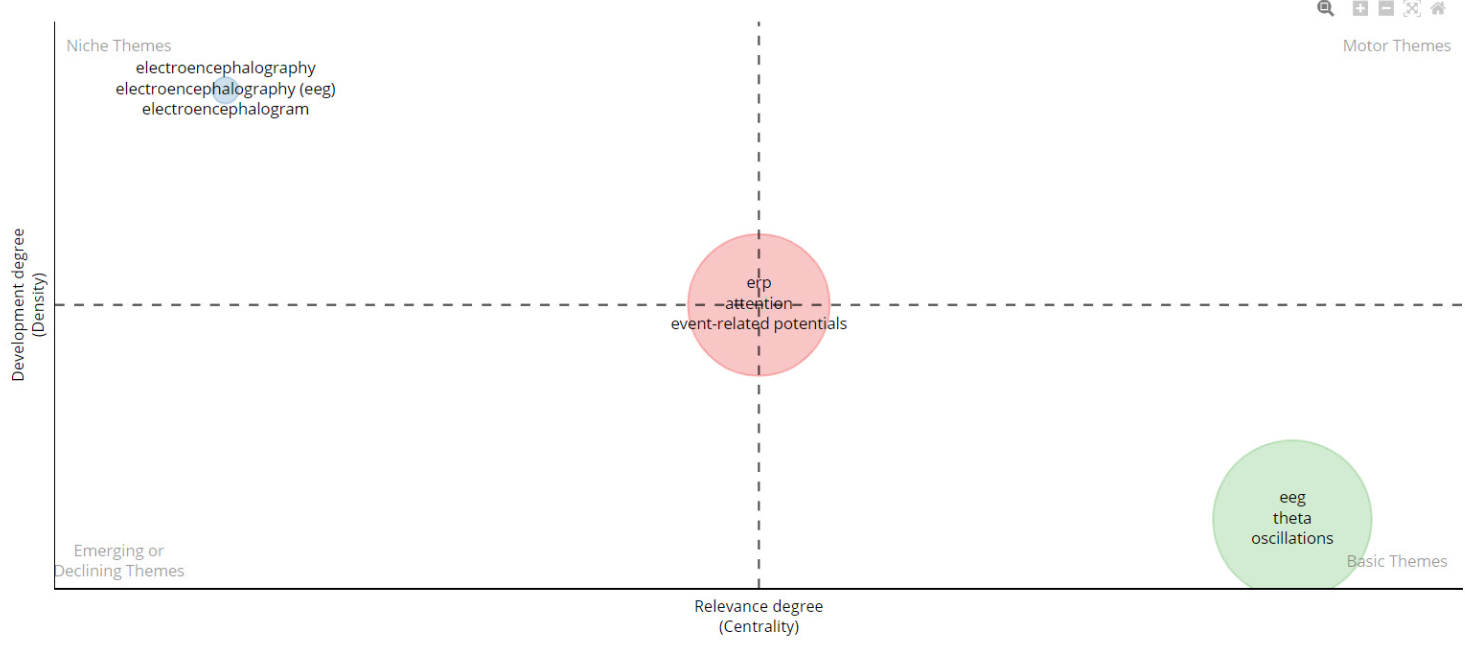


## Thematic Network Authors Keyword


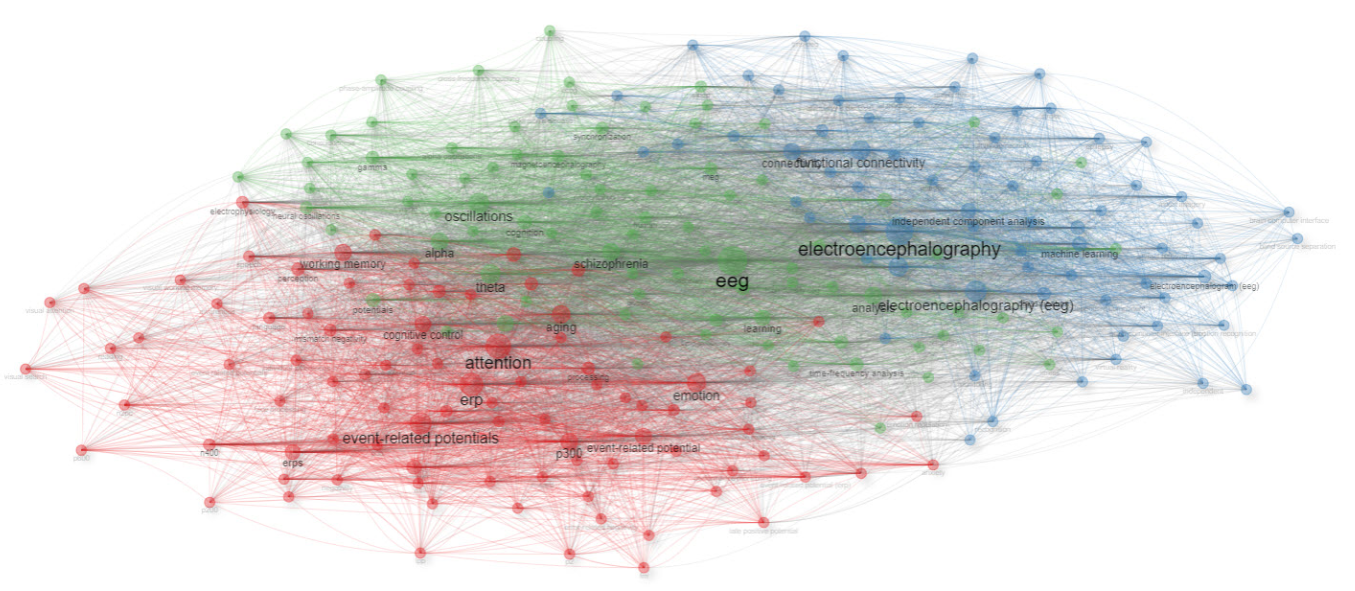


## Thematic Map Unigram Word in title


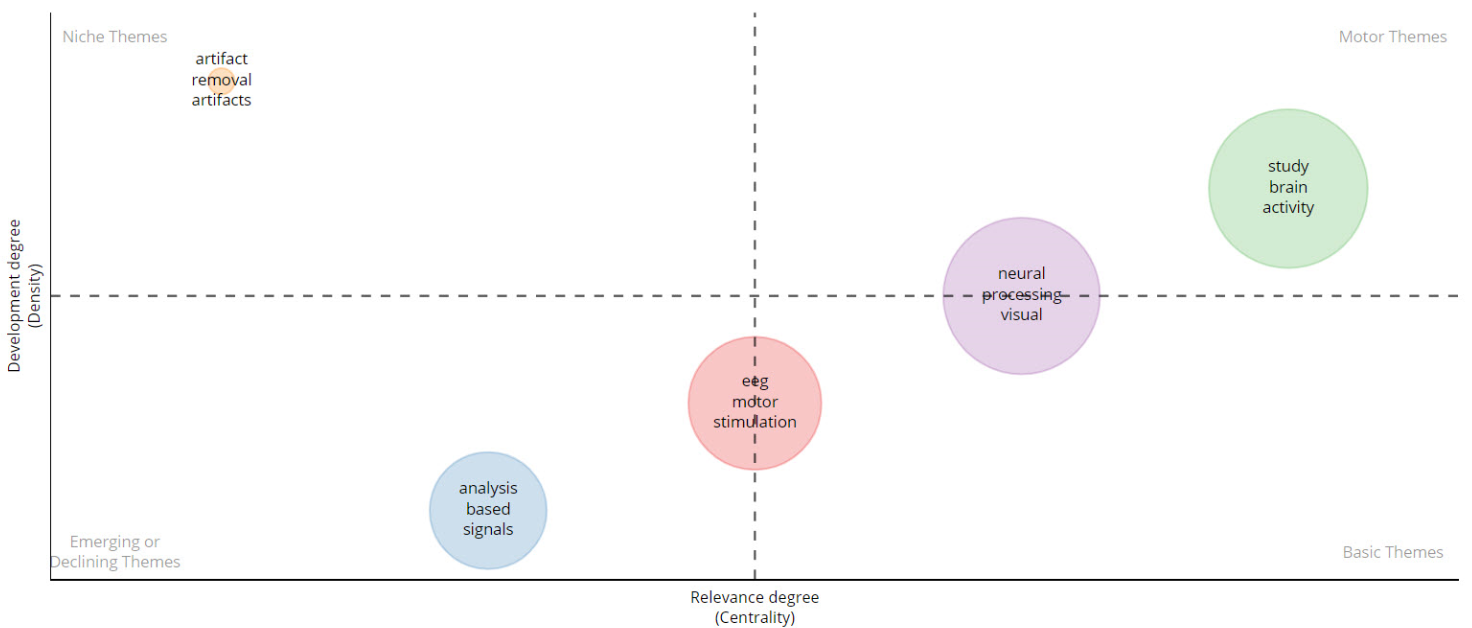


## Thematic Network Unigram Word in title


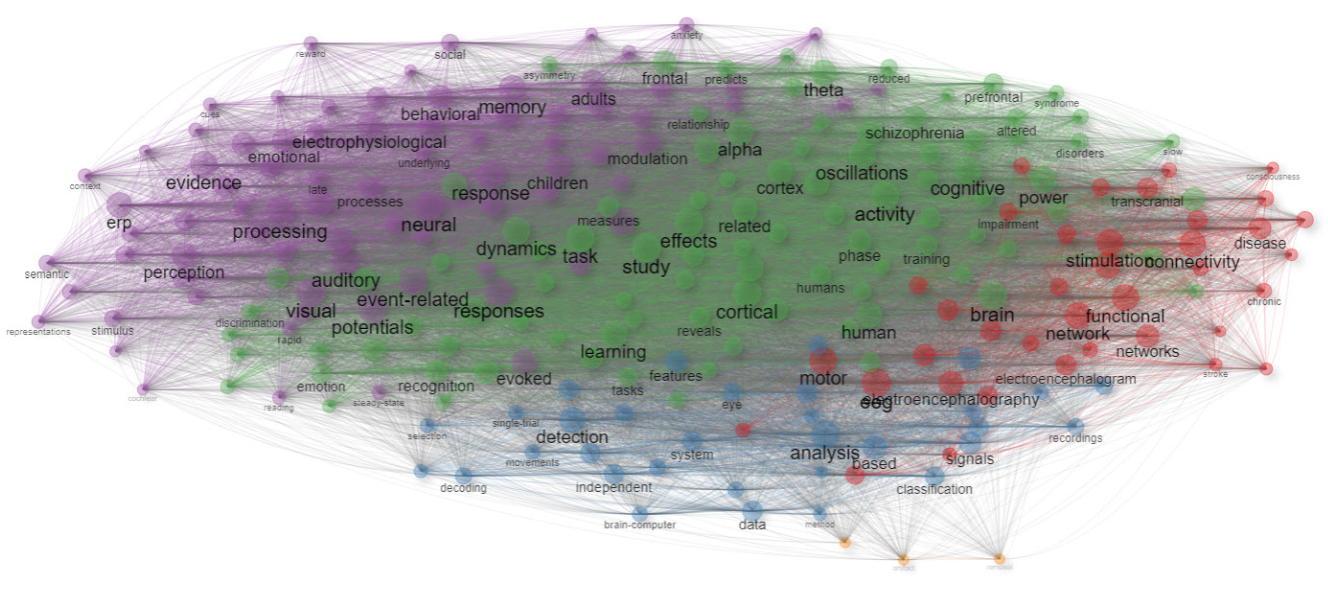


## Thematic Map Bigram Word in title


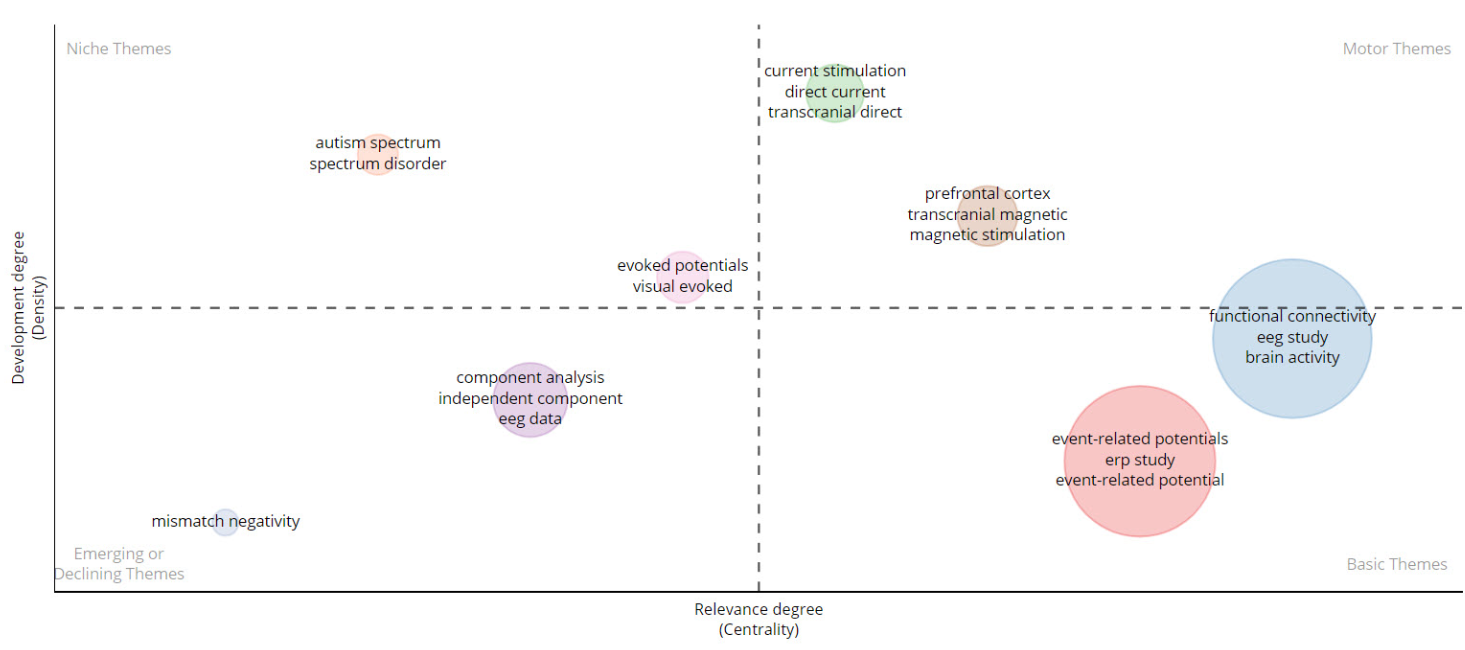


## Thematic Network Bigram Word in title


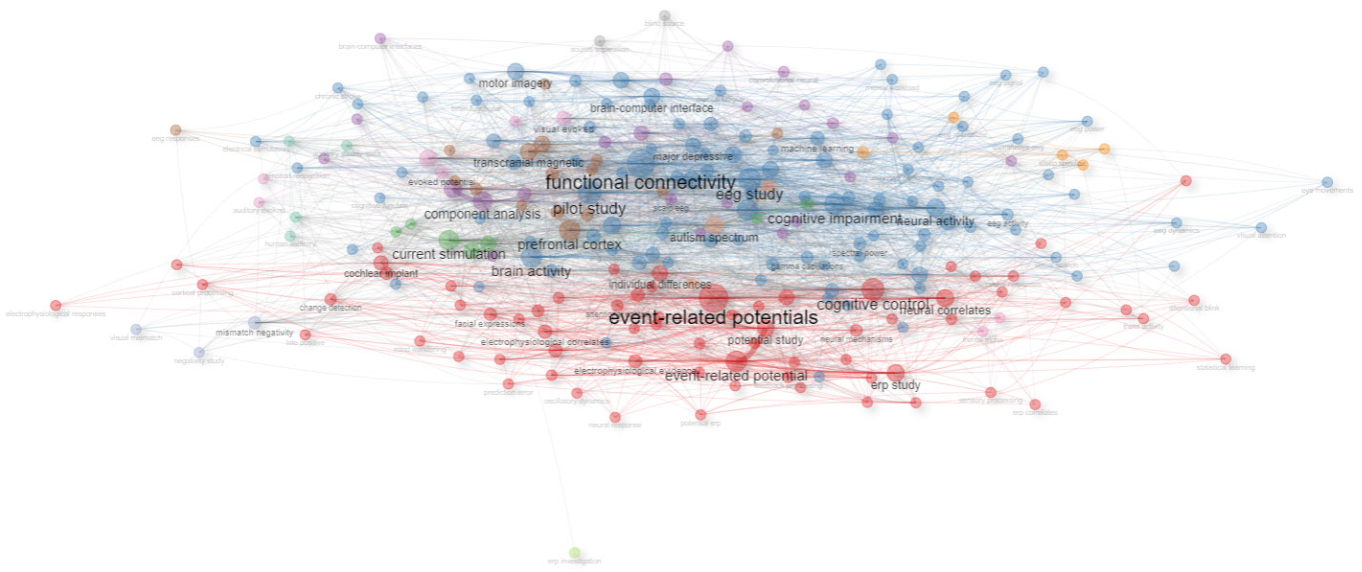


## Thematic Map Trigram Word in title


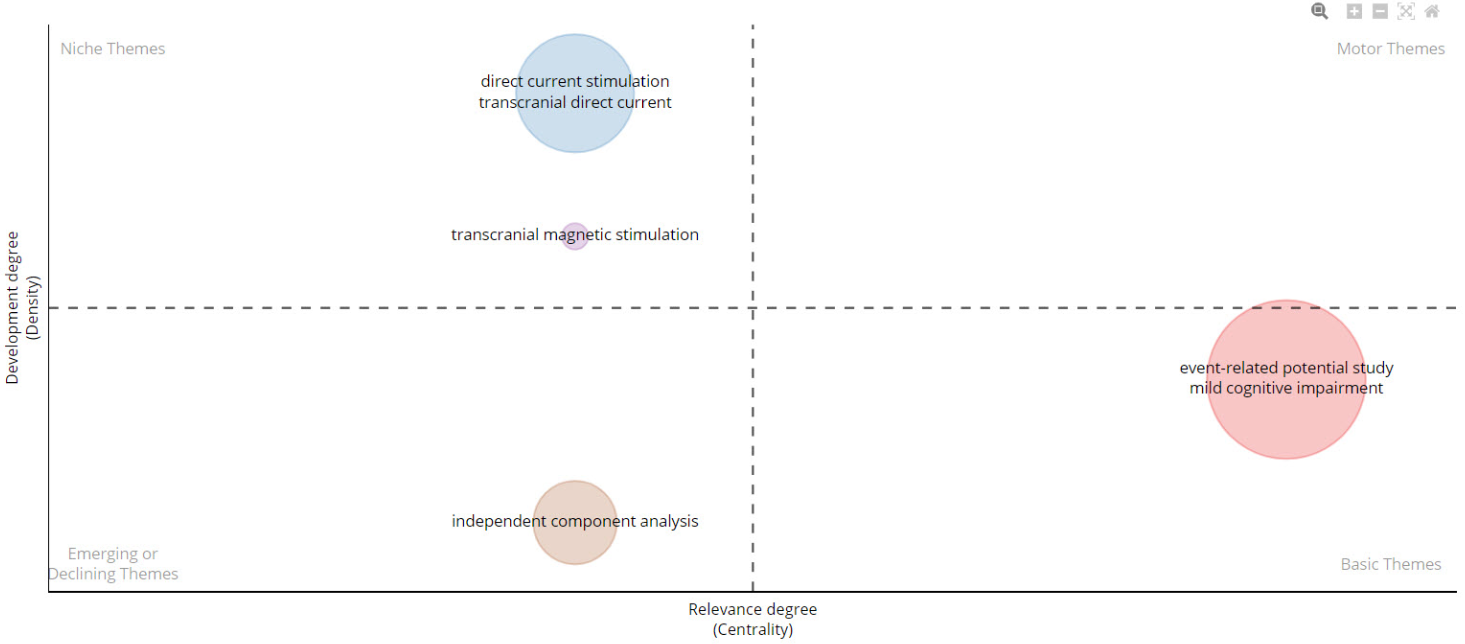


## Thematic Network Trigram Word in title


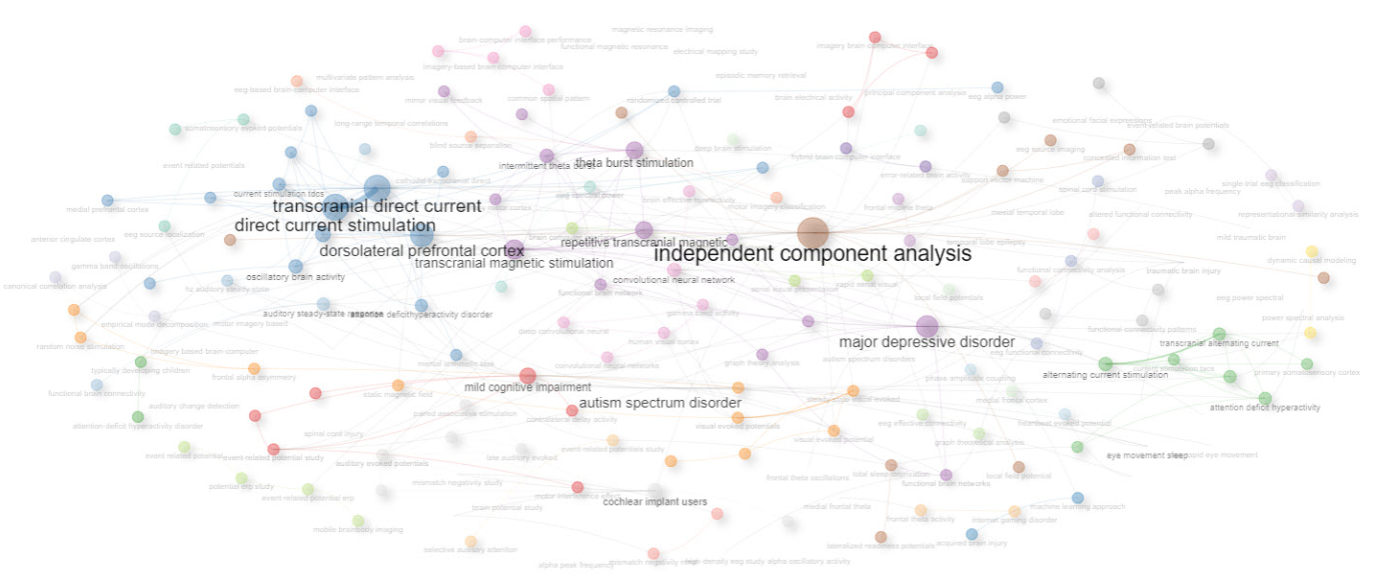


## Thematic Map Unigram Word in Abstract


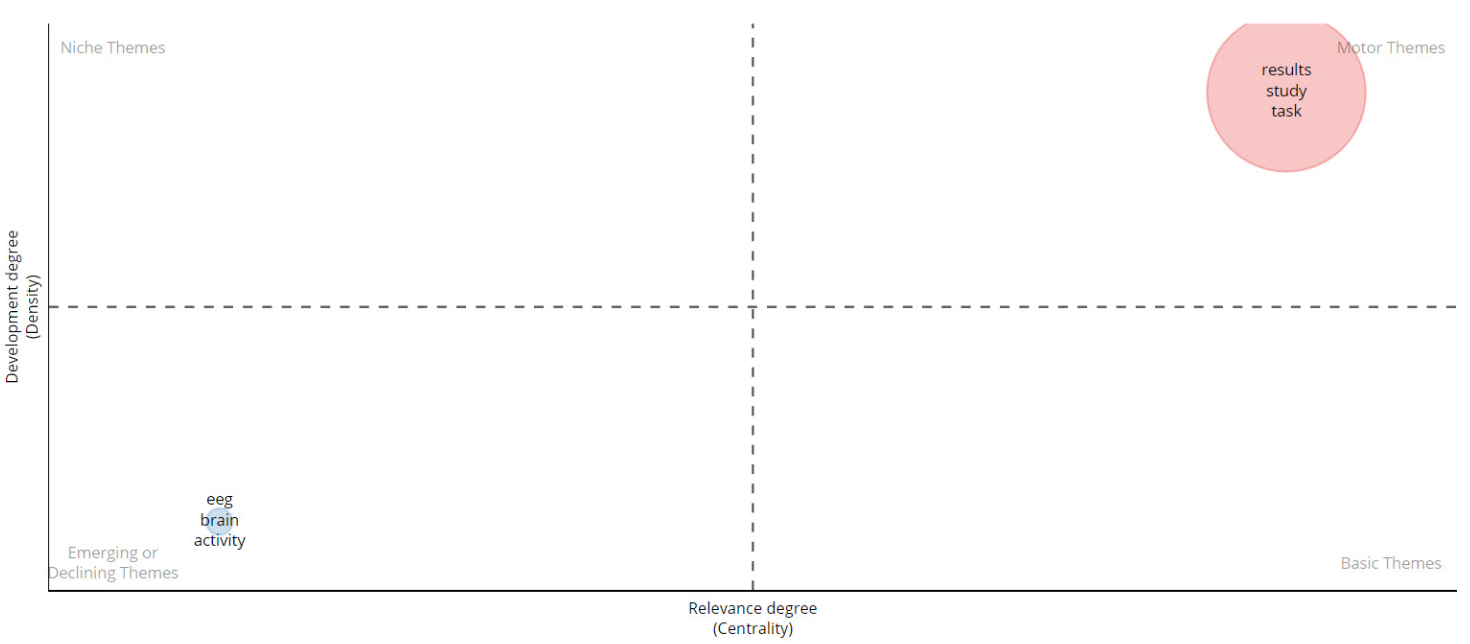


## Thematic Network Unigram Word in Abstract


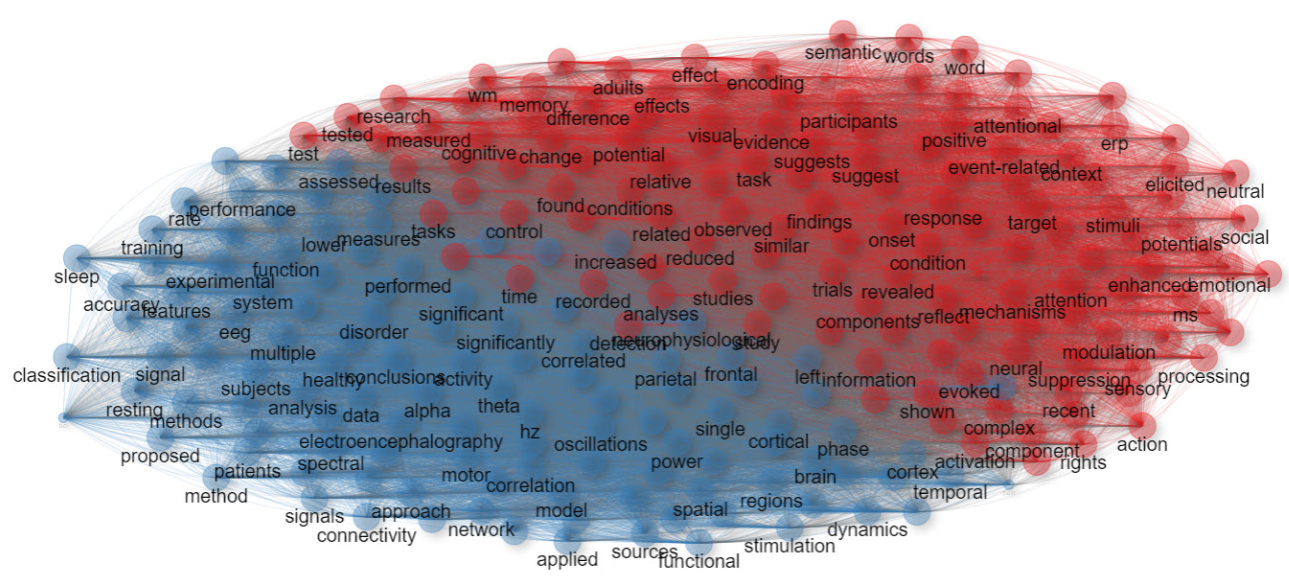


## Thematic Map Bigram Word in Abstract


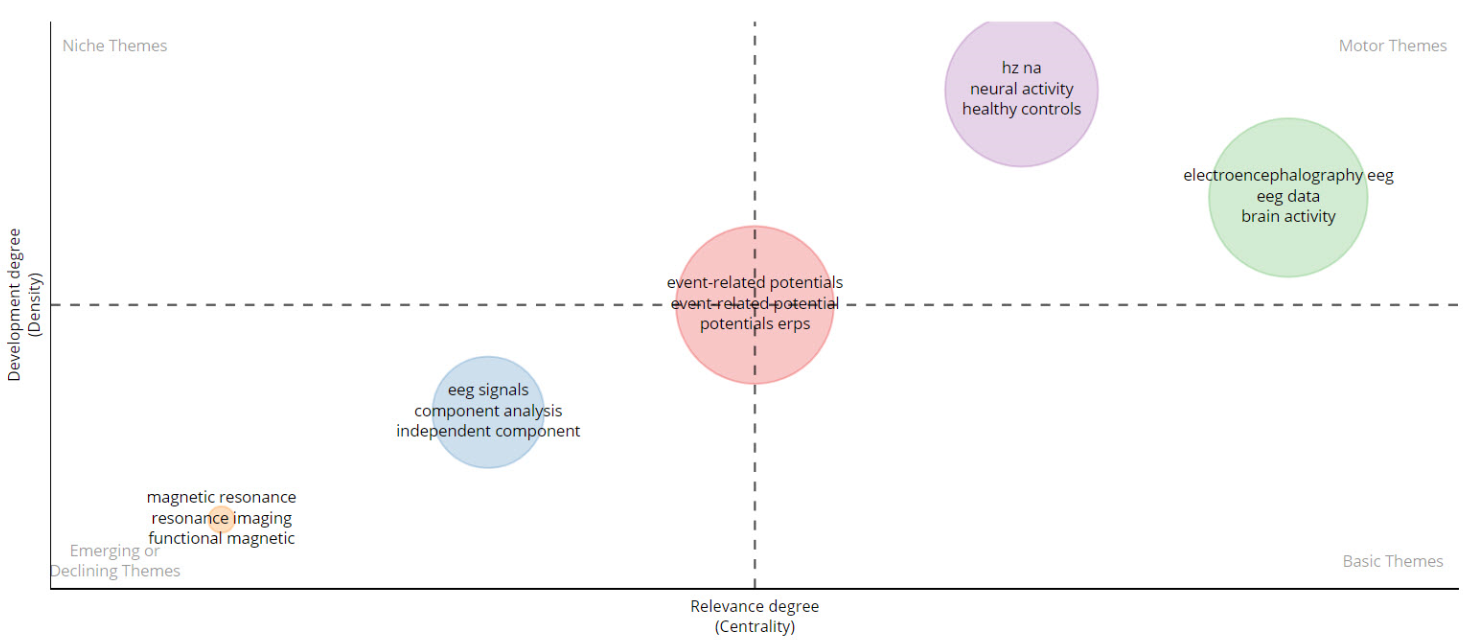


## Thematic Network Bigram Word in Abstract


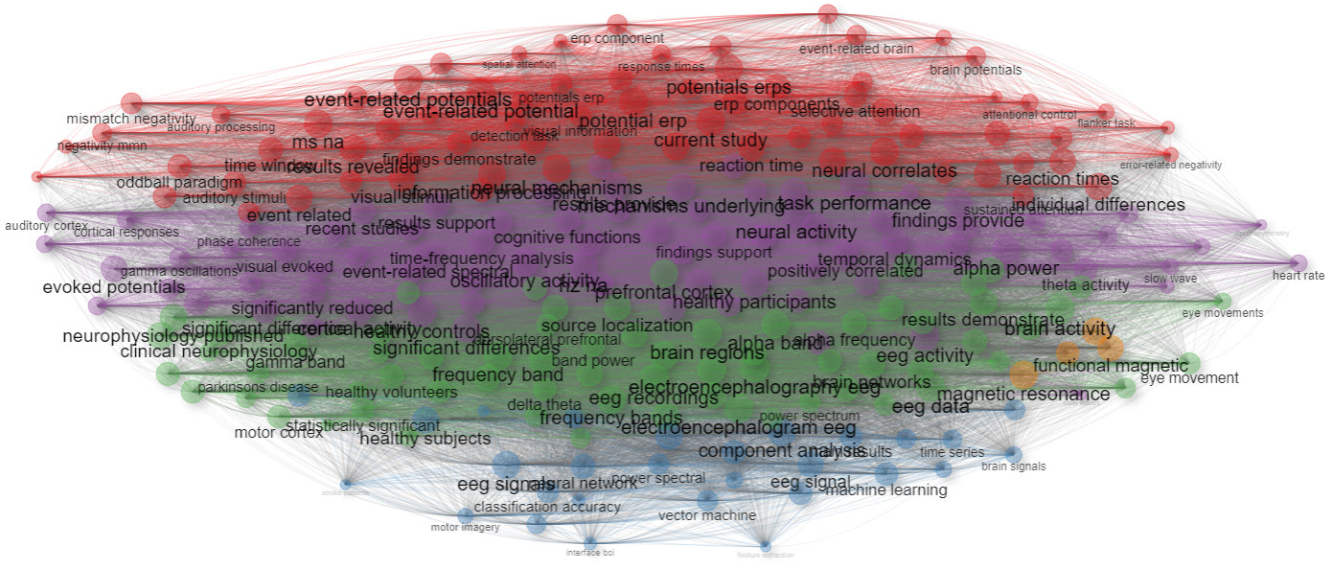


## Thematic Map Trigram Word in Abstract


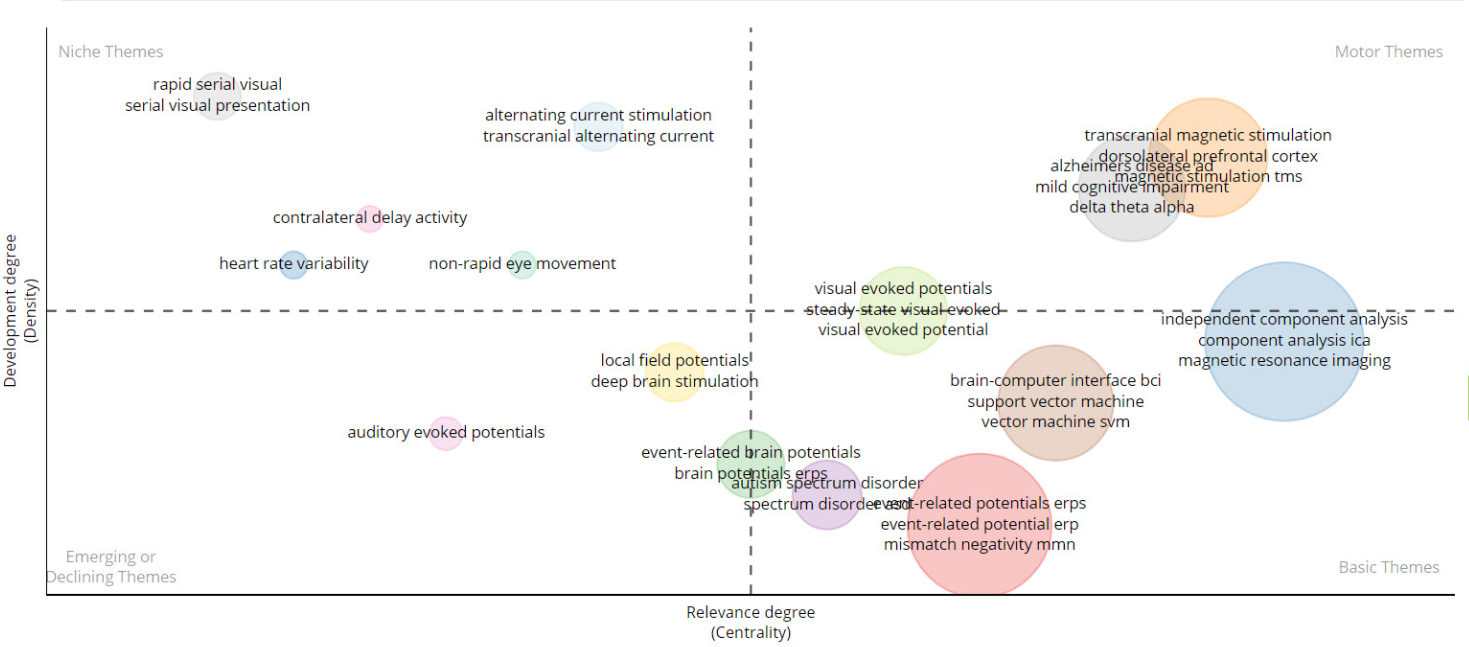


## Thematic Network Trigram Word in Abstract


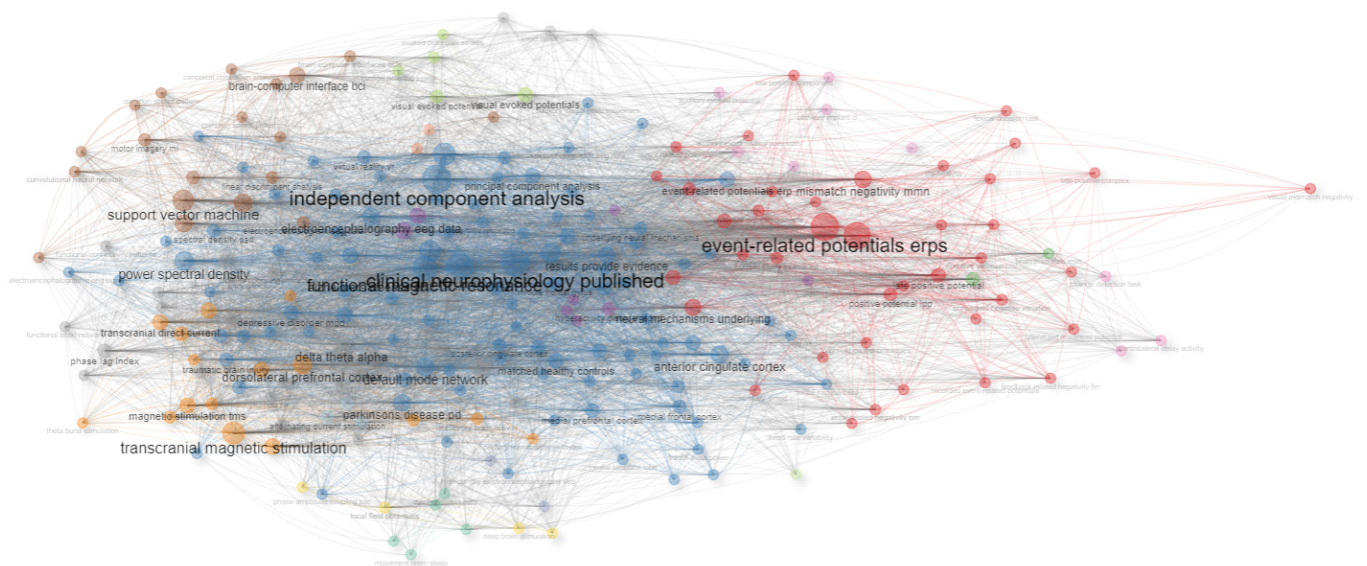


# Correspondence Analysis

## Multiple Correspondence Analysis of Keyword Plus


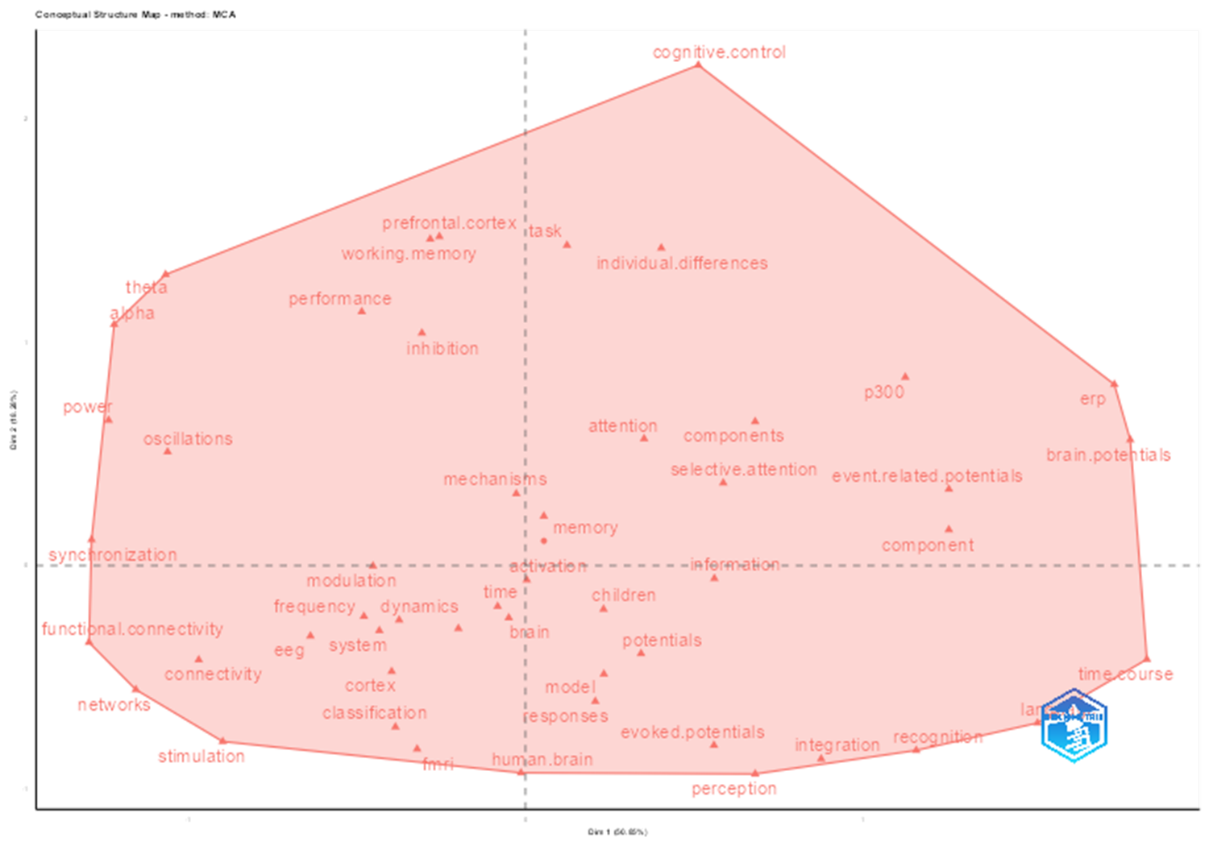


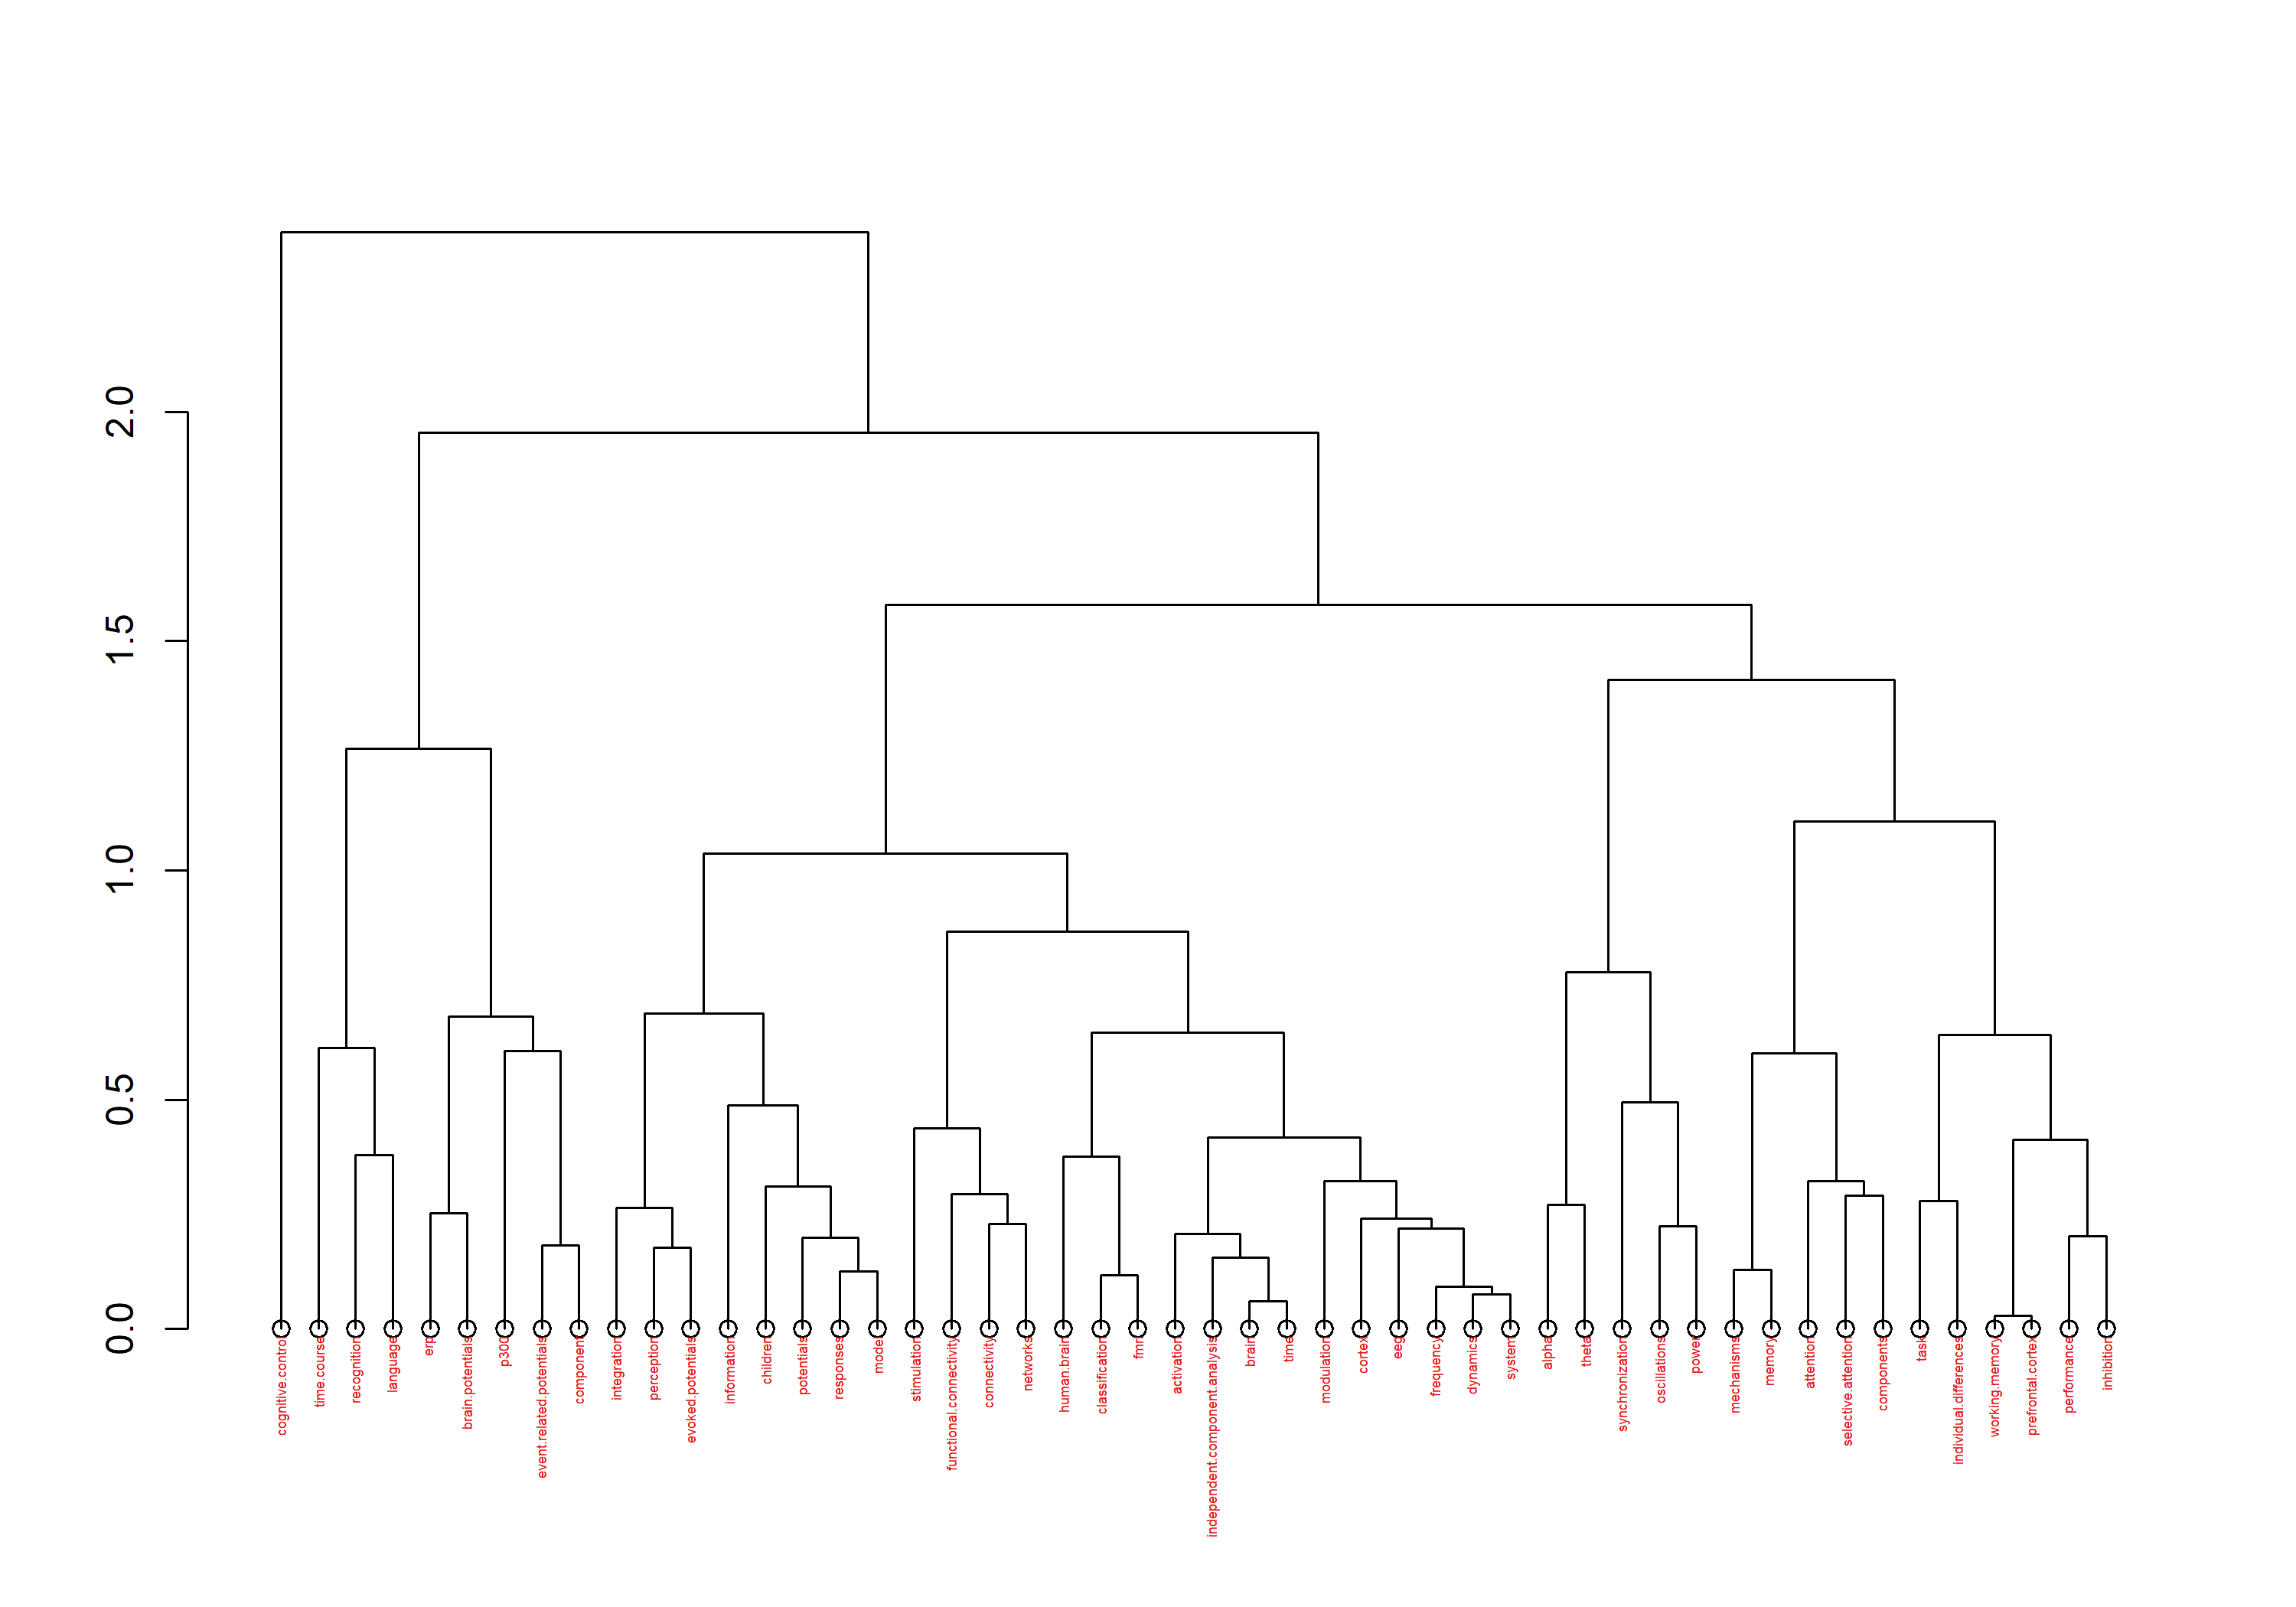


## Correspondence Analysis of Keyword Plus


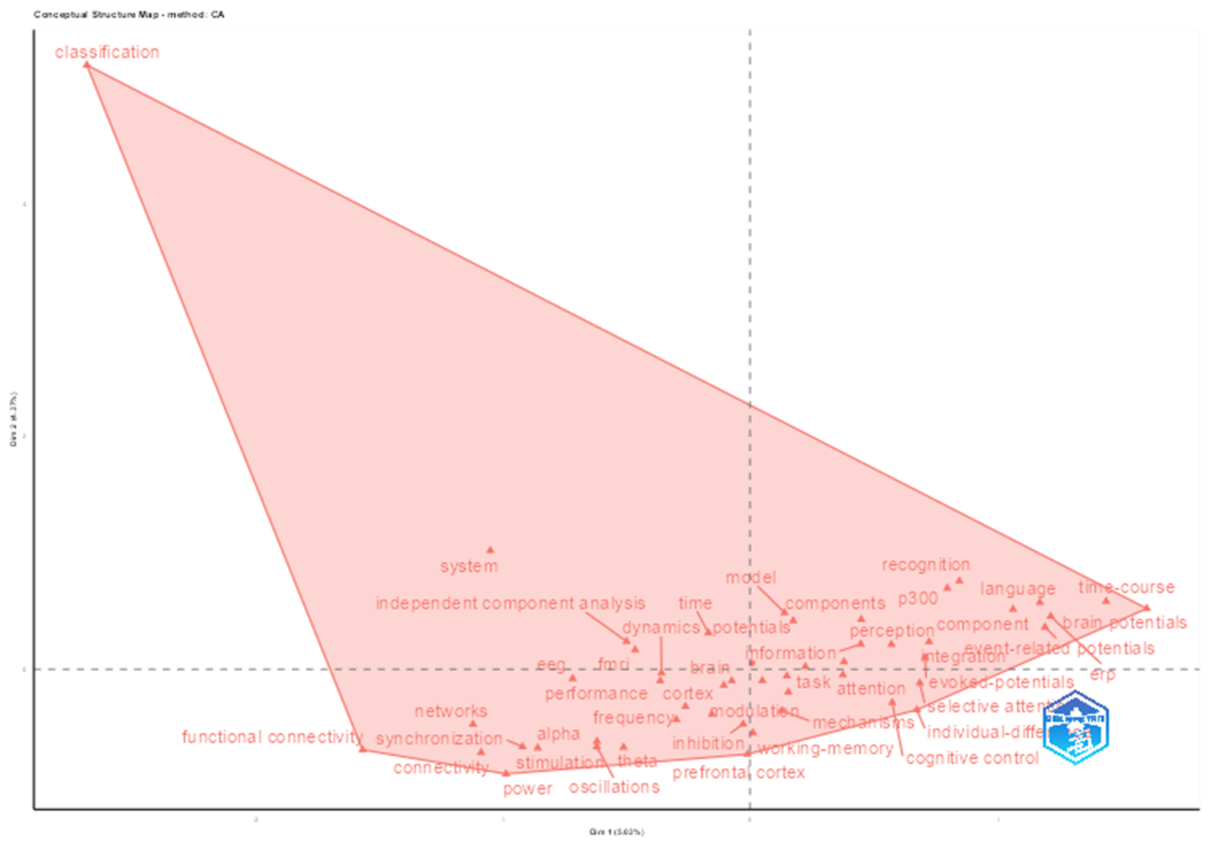


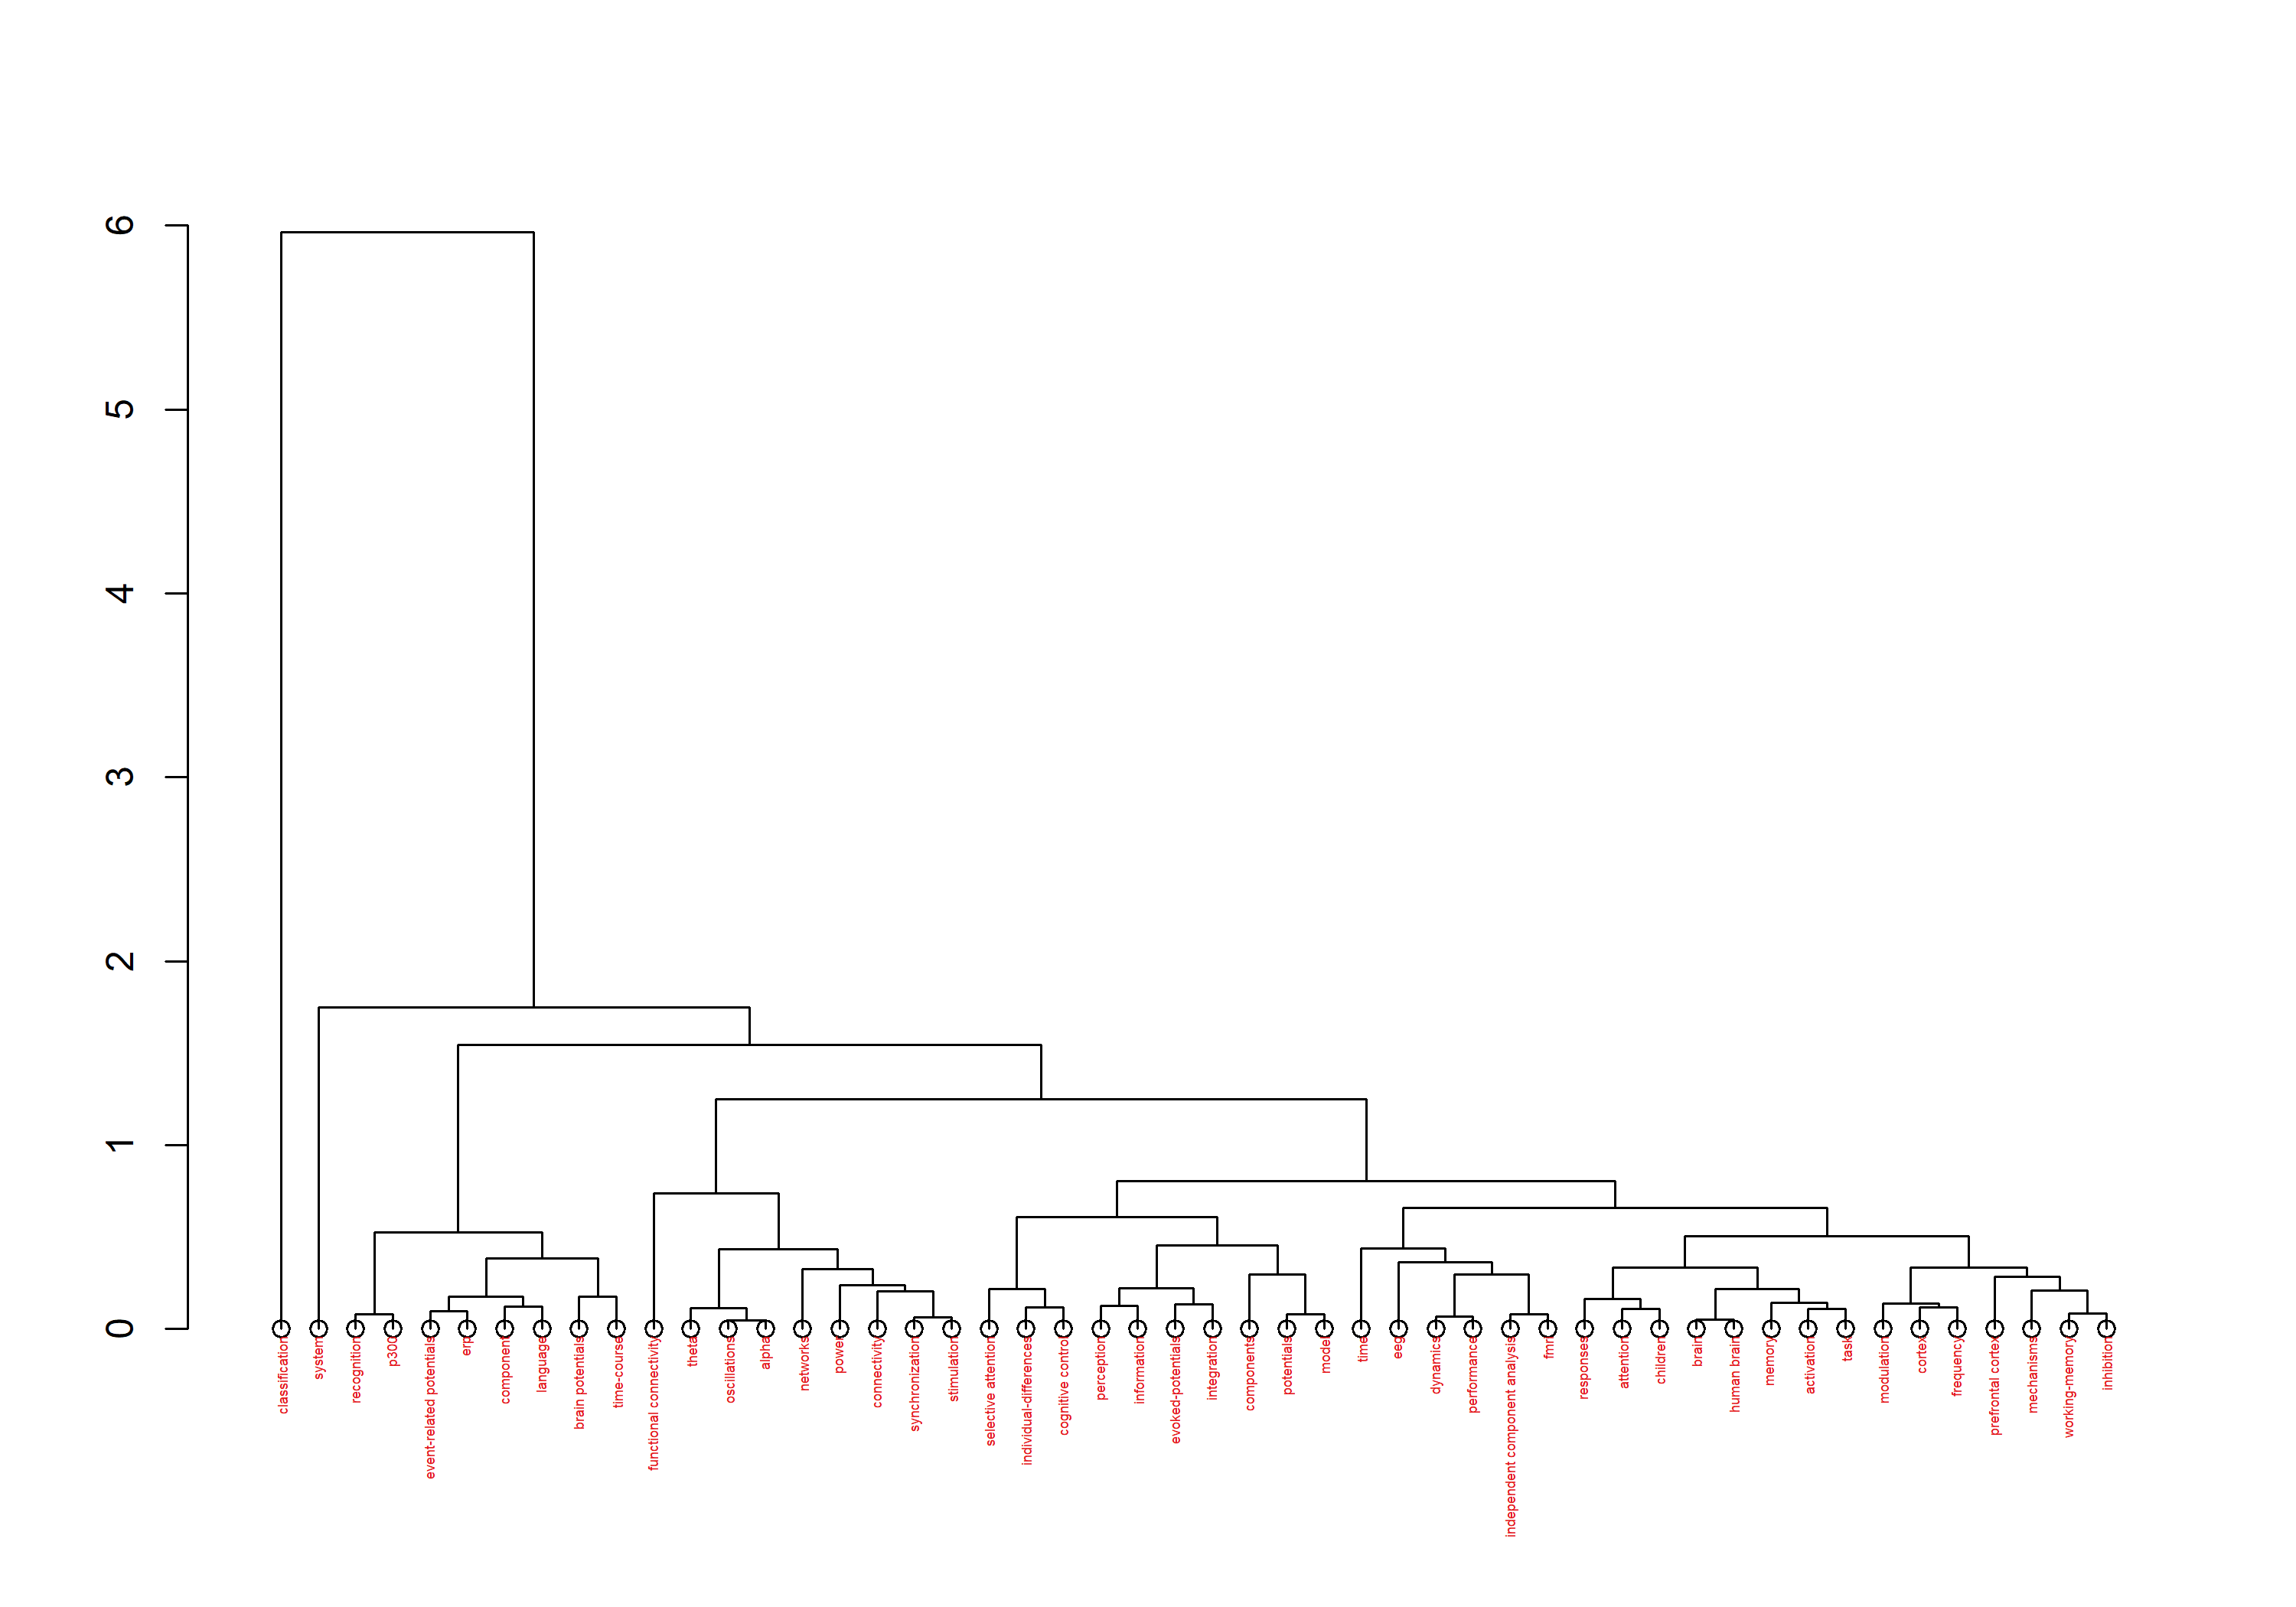


## Multiple Correspondence Analysis of Authors Keywords


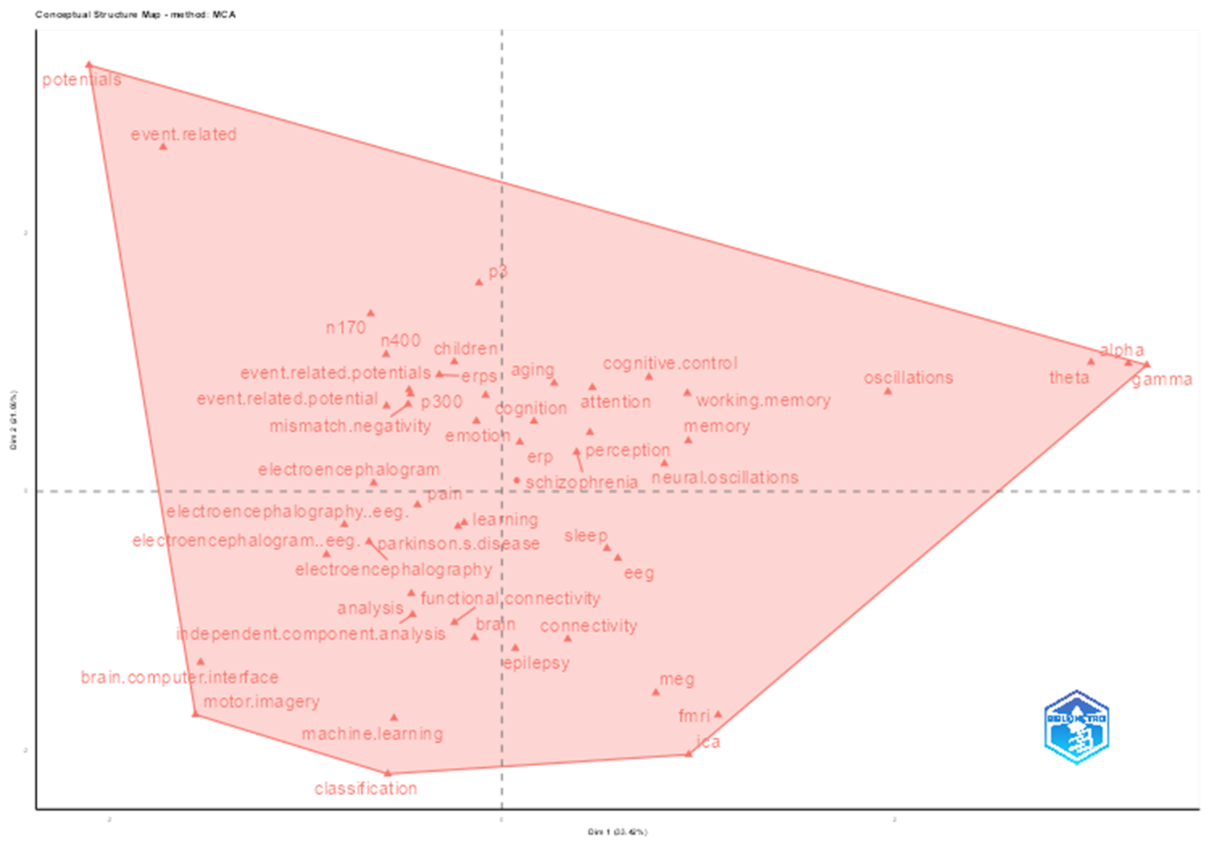


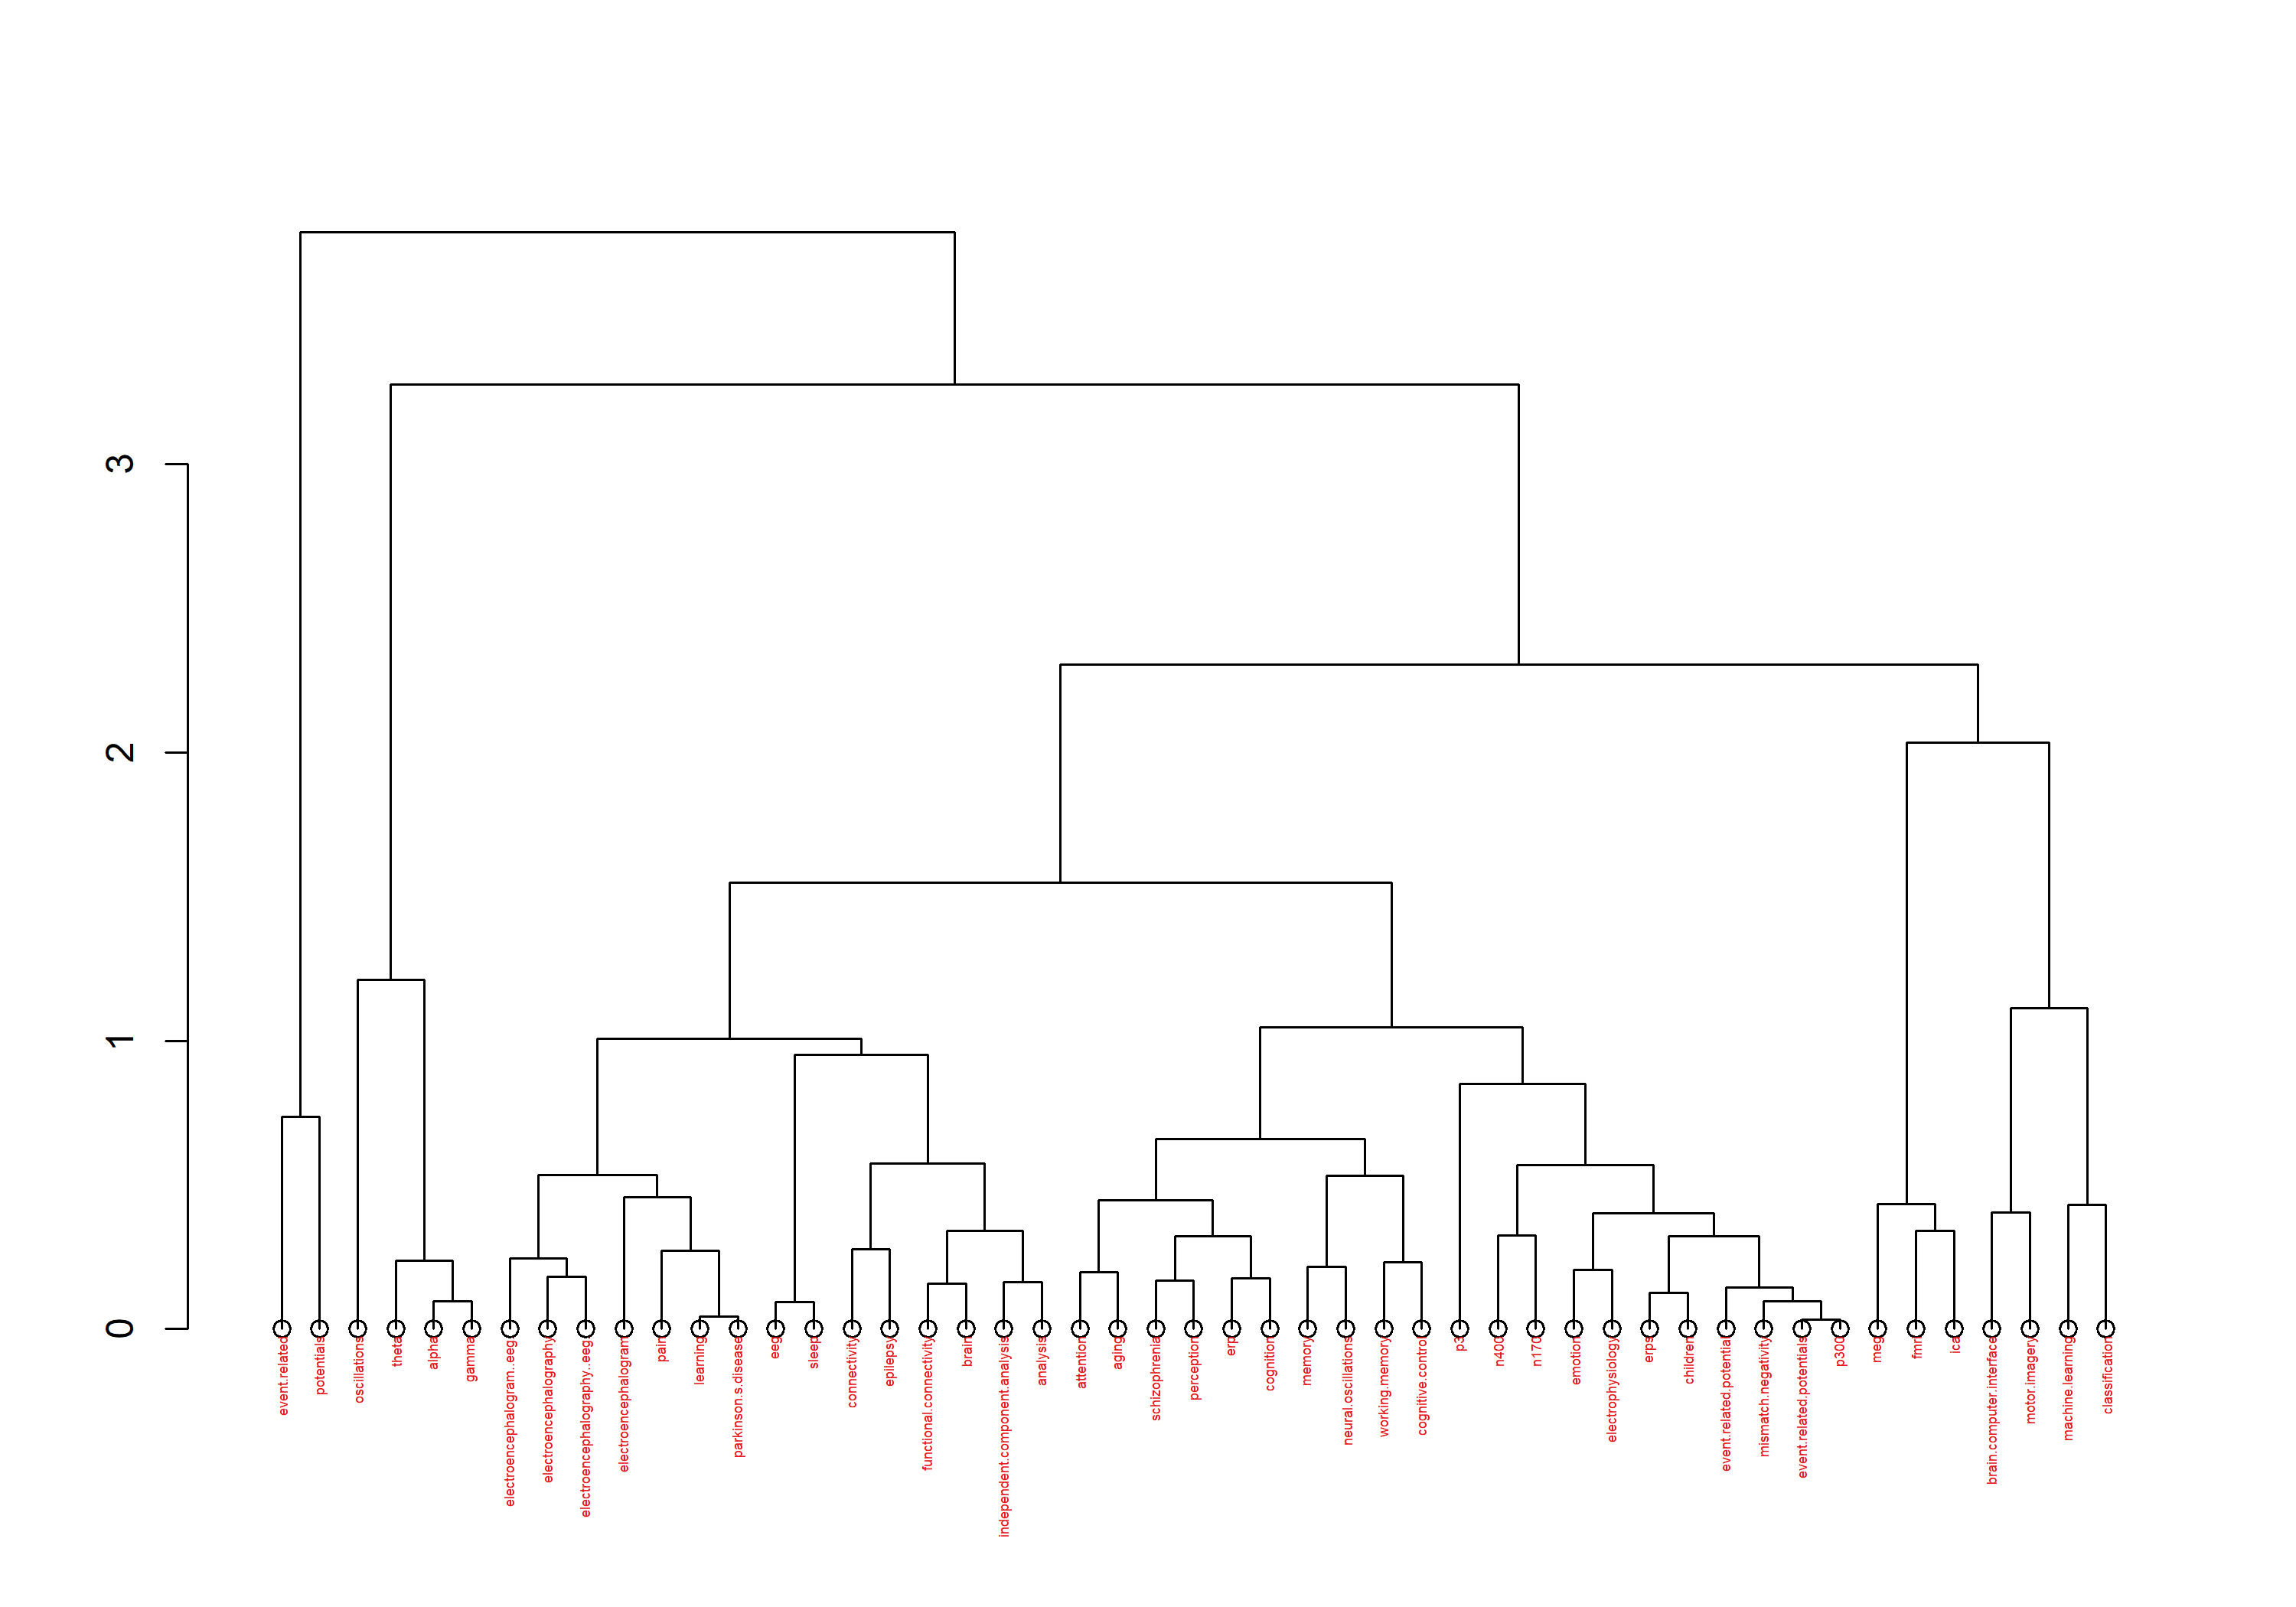


## Correspondence Analysis of Authors Keywords


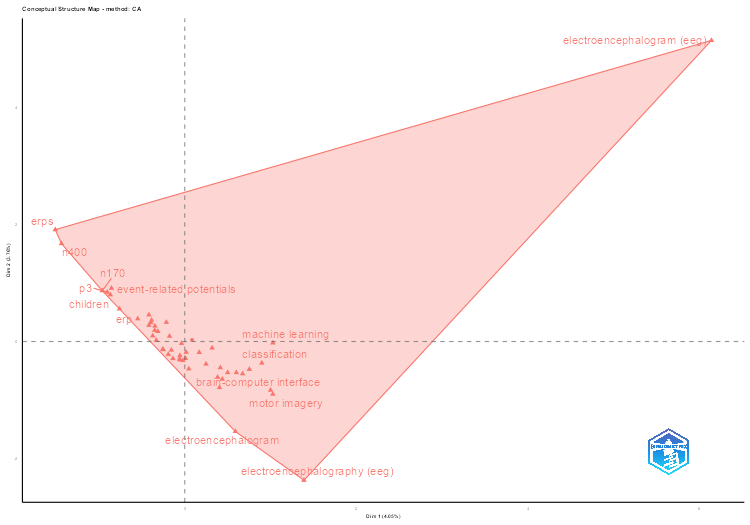


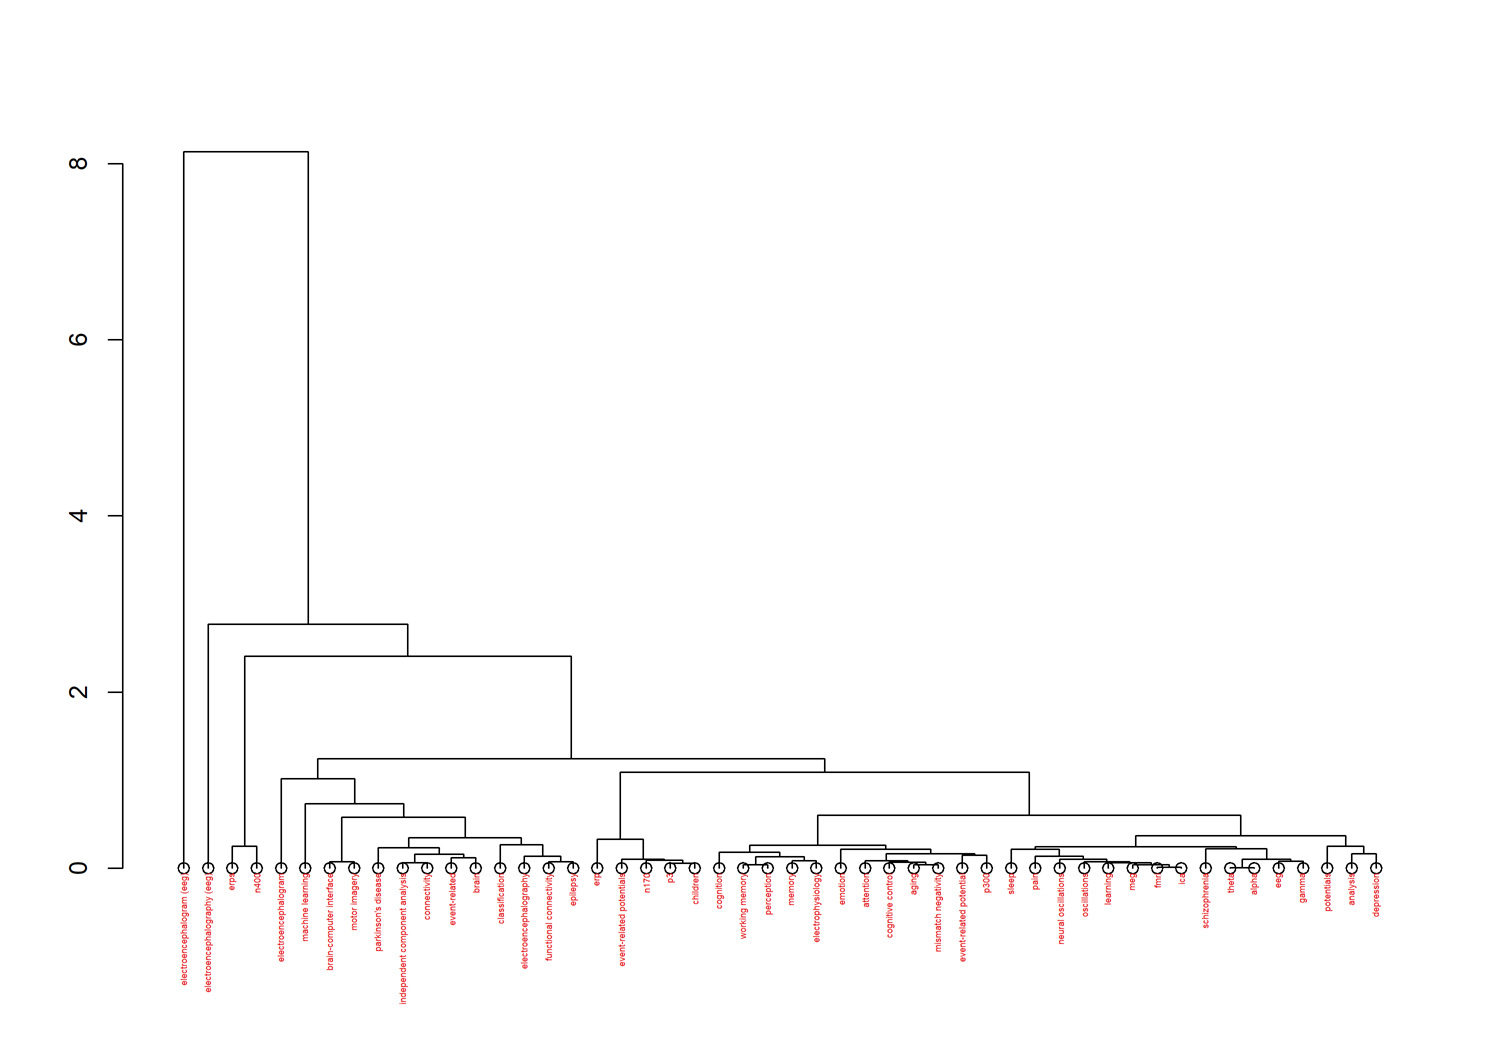


# Co-citation Network

## Co-Citation Network for Research Articles


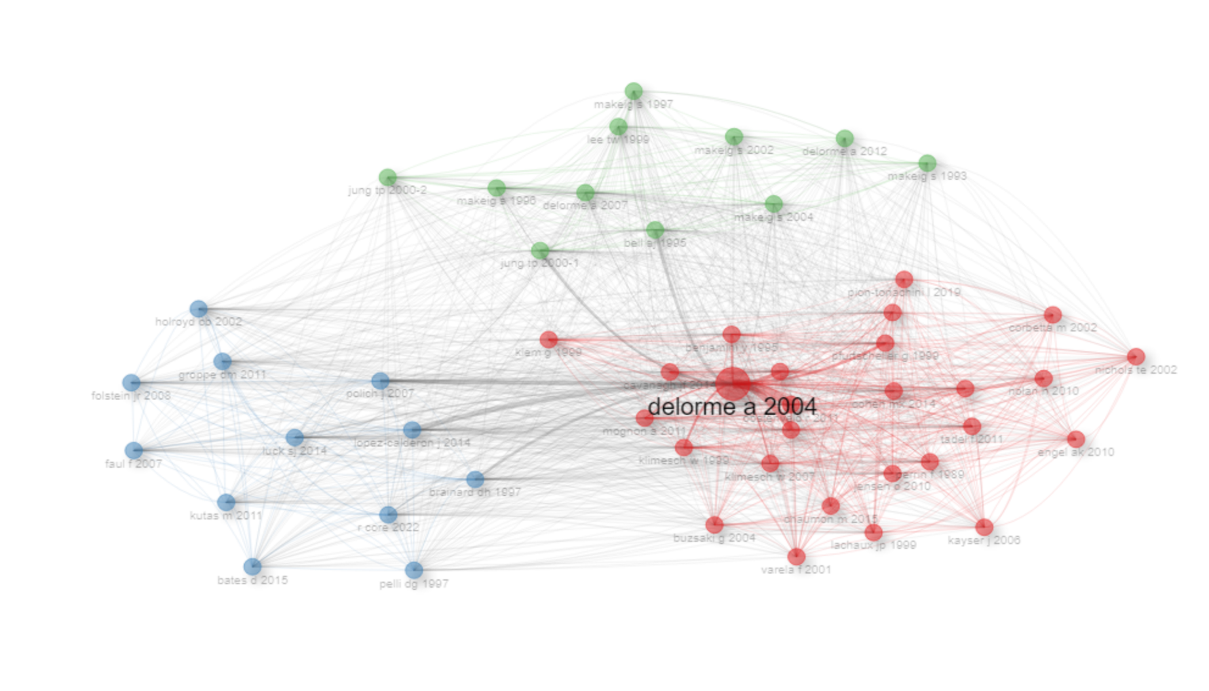


| **Node** | **Cluster** | **Betweenness** | **Closeness** | **PageRank** |
| --- | --- | --- | --- | --- |
| **delorme a 2004** | 1 | 113.052 | 0.013 | 0.020 |
| **oostenveld r 2011** | 1 | 1.799 | 0.013 | 0.020 |
| **maris e 2007** | 1 | 1.872 | 0.013 | 0.020 |
| **oldfield rc 1971** | 1 | 1.072 | 0.013 | 0.020 |
| **pfurtscheller g 1999** | 1 | 0.902 | 0.013 | 0.020 |
| **klimesch w 1999** | 1 | 0.526 | 0.013 | 0.020 |
| **benjamini y 1995** | 1 | 0.531 | 0.013 | 0.020 |
| **klimesch w 2007** | 1 | 0.400 | 0.013 | 0.020 |
| **pascual-marqui rd 2002** | 1 | 0.179 | 0.013 | 0.020 |
| **mognon a 2011** | 1 | 0.436 | 0.013 | 0.020 |
| **cohen mx 2014** | 1 | 0.304 | 0.013 | 0.020 |
| **tadel f 2011** | 1 | 0.142 | 0.013 | 0.020 |
| **klimesch w 2012** | 1 | 0.203 | 0.013 | 0.020 |
| **perrin f 1989** | 1 | 0.229 | 0.013 | 0.020 |
| **jensen o 2010** | 1 | 0.158 | 0.013 | 0.020 |
| **klem g 1999** | 1 | 0.180 | 0.013 | 0.020 |
| **cavanagh jf 2014** | 1 | 0.226 | 0.013 | 0.020 |
| **pion-tonachini l 2019** | 1 | 0.214 | 0.013 | 0.020 |
| **lachaux jp 1999** | 1 | 0.067 | 0.013 | 0.020 |
| **buzsaki g 2004** | 1 | 0.072 | 0.013 | 0.020 |
| **engel ak 2010** | 1 | 0.094 | 0.013 | 0.020 |
| **kayser j 2006** | 1 | 0.084 | 0.013 | 0.020 |
| **nolan h 2010** | 1 | 0.163 | 0.013 | 0.020 |
| **corbetta m 2002** | 1 | 0.078 | 0.013 | 0.020 |
| **varela f 2001** | 1 | 0.081 | 0.013 | 0.020 |
| **nichols te 2002** | 1 | 0.064 | 0.013 | 0.020 |
| **chaumon m 2015** | 1 | 0.193 | 0.013 | 0.020 |
| **lopez-calderon j 2014** | 2 | 32.674 | 0.017 | 0.020 |
| **polich j 2007** | 2 | 34.353 | 0.017 | 0.020 |
| **brainard dh 1997** | 2 | 35.855 | 0.017 | 0.020 |
| **luck sj 2014** | 2 | 12.741 | 0.017 | 0.020 |
| **r core 2022** | 2 | 14.813 | 0.017 | 0.020 |
| **kutas m 2011** | 2 | 2.686 | 0.016 | 0.020 |
| **holroyd cb 2002** | 2 | 5.197 | 0.016 | 0.020 |
| **folstein jr 2008** | 2 | 4.397 | 0.017 | 0.020 |
| **faul f 2007** | 2 | 5.057 | 0.016 | 0.020 |
| **pelli dg 1997** | 2 | 5.944 | 0.016 | 0.020 |
| **groppe dm 2011** | 2 | 7.163 | 0.017 | 0.020 |
| **bates d 2015** | 2 | 5.864 | 0.016 | 0.020 |
| **bell aj 1995** | 3 | 43.574 | 0.017 | 0.020 |
| **jung tp 2000-1** | 3 | 33.959 | 0.017 | 0.020 |
| **delorme a 2007** | 3 | 17.733 | 0.017 | 0.020 |
| **makeig s 1996** | 3 | 14.911 | 0.017 | 0.020 |
| **makeig s 2004** | 3 | 24.668 | 0.017 | 0.020 |
| **makeig s 1993** | 3 | 13.419 | 0.016 | 0.020 |
| **lee tw 1999** | 3 | 7.507 | 0.017 | 0.020 |
| **jung tp 2000-2** | 3 | 5.037 | 0.017 | 0.020 |
| **makeig s 2002** | 3 | 9.994 | 0.017 | 0.020 |
| **makeig s 1997** | 3 | 4.495 | 0.017 | 0.020 |
| **delorme a 2012** | 3 | 12.638 | 0.017 | 0.020 |

## Co-Citation Network for Authors


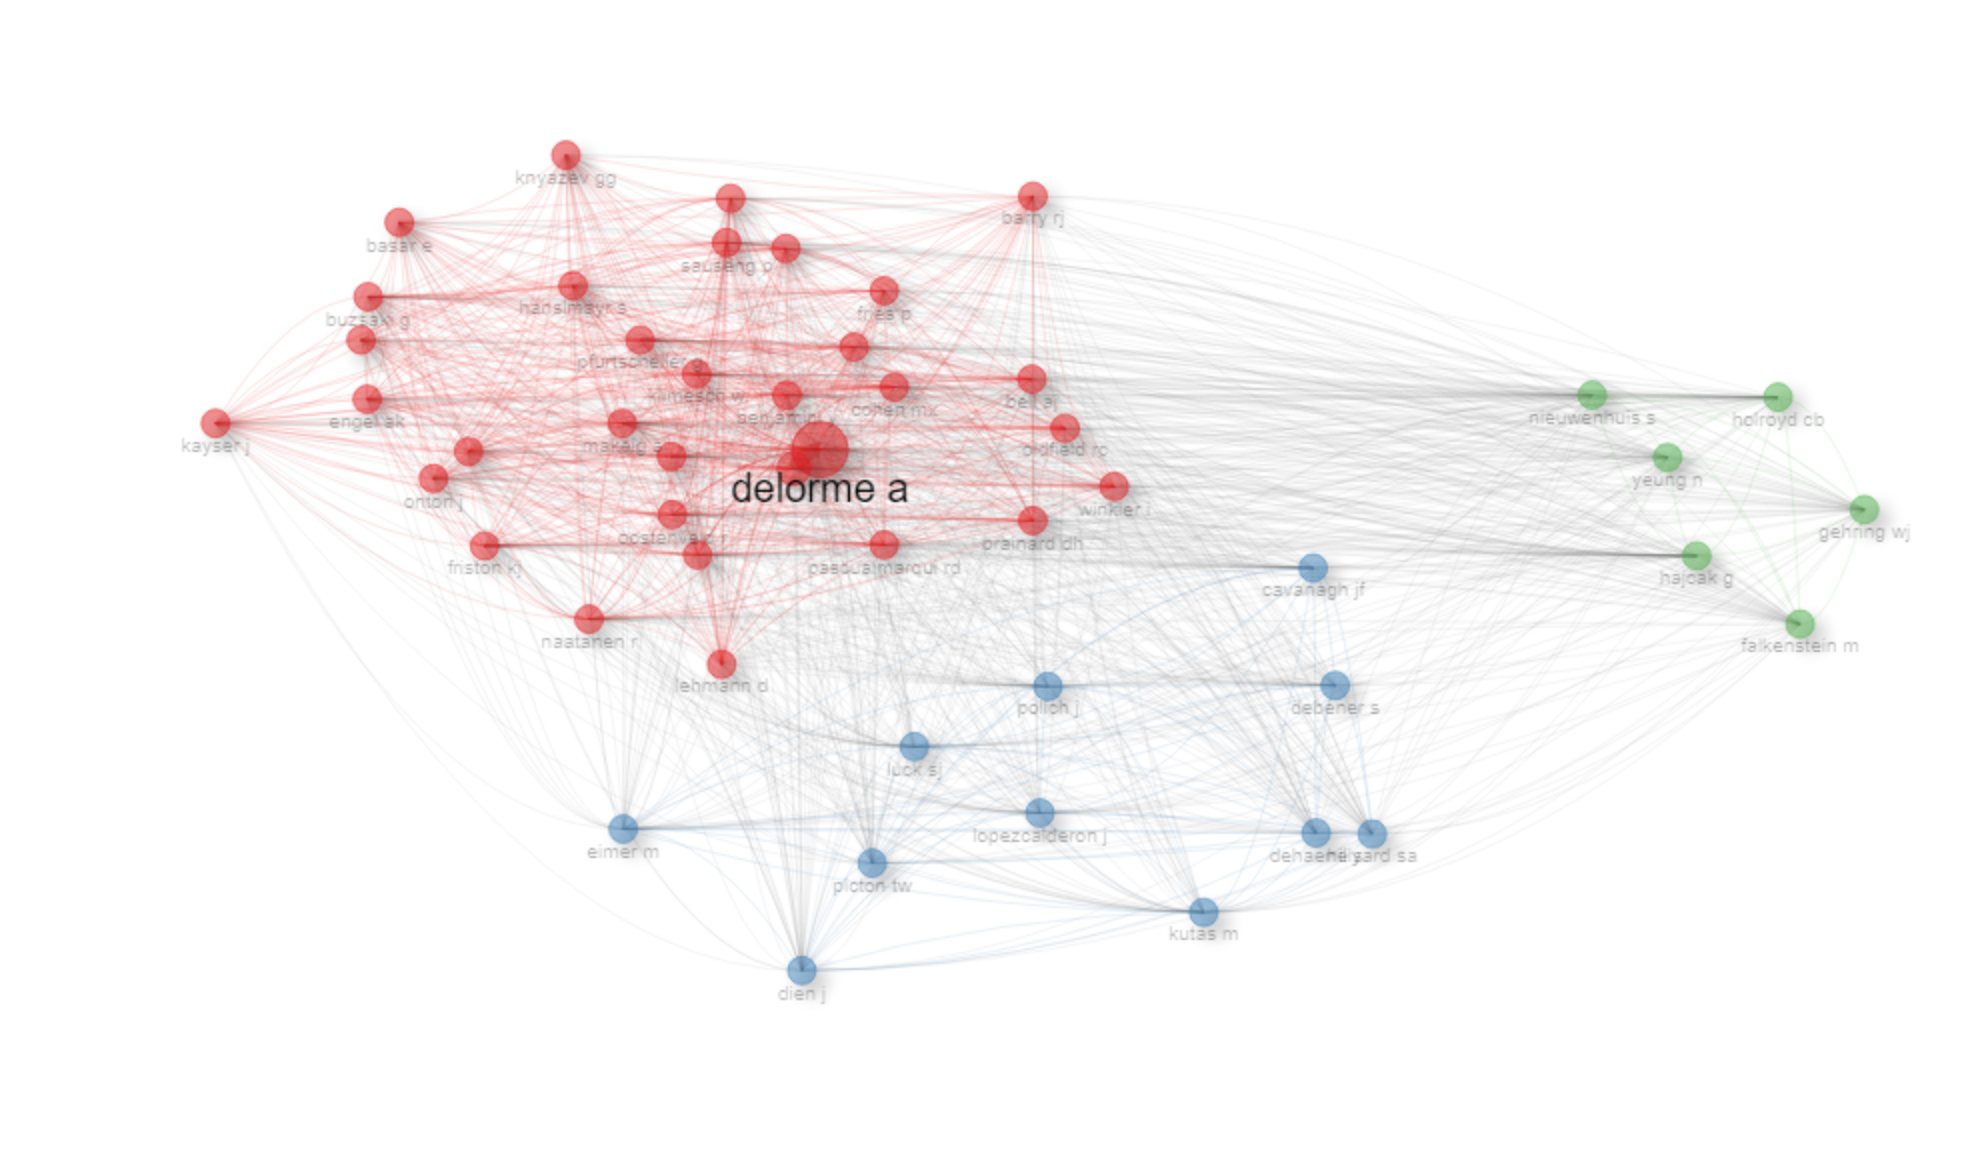


| **Node** | **Cluster** | **Betweenness** | **Closeness** | **PageRank** |
| --- | --- | --- | --- | --- |
| **delorme a** | 1 | 46.54 | 0.01 | 0.02 |
| **anonymous** | 1 | 10.47 | 0.01 | 0.02 |
| **klimesch w** | 1 | 0.61 | 0.01 | 0.02 |
| **pfurtscheller g** | 1 | 0.23 | 0.01 | 0.02 |
| **makeig s** | 1 | 1.17 | 0.01 | 0.02 |
| **oostenveld r** | 1 | 0.71 | 0.01 | 0.02 |
| **cohen mx** | 1 | 1.06 | 0.01 | 0.02 |
| **naatanen r** | 1 | 0.48 | 0.01 | 0.02 |
| **jung tp** | 1 | 0.75 | 0.01 | 0.02 |
| **maris e** | 1 | 0.51 | 0.01 | 0.02 |
| **jensen o** | 1 | 0.18 | 0.01 | 0.02 |
| **pascualmarqui rd** | 1 | 0.13 | 0.01 | 0.02 |
| **friston kj** | 1 | 0.20 | 0.01 | 0.02 |
| **benjamini y** | 1 | 0.27 | 0.01 | 0.02 |
| **buzsaki g** | 1 | 0.05 | 0.01 | 0.02 |
| **sauseng p** | 1 | 0.17 | 0.01 | 0.02 |
| **oldfield rc** | 1 | 0.43 | 0.01 | 0.02 |
| **bell aj** | 1 | 0.42 | 0.01 | 0.02 |
| **babiloni c** | 1 | 0.03 | 0.01 | 0.02 |
| **winkler i** | 1 | 0.13 | 0.01 | 0.02 |
| **tallonbaudry c** | 1 | 0.09 | 0.01 | 0.02 |
| **brainard dh** | 1 | 0.34 | 0.01 | 0.02 |
| **fries p** | 1 | 0.06 | 0.01 | 0.02 |
| **hanslmayr s** | 1 | 0.10 | 0.01 | 0.02 |
| **stam cj** | 1 | 0.01 | 0.01 | 0.02 |
| **onton j** | 1 | 0.13 | 0.01 | 0.02 |
| **engel ak** | 1 | 0.06 | 0.01 | 0.02 |
| **perrin f** | 1 | 0.16 | 0.01 | 0.02 |
| **kayser j** | 1 | 0.17 | 0.01 | 0.02 |
| **basar e** | 1 | 0.04 | 0.01 | 0.02 |
| **barry rj** | 1 | 0.05 | 0.01 | 0.02 |
| **knyazev gg** | 1 | 0.02 | 0.01 | 0.02 |
| **lehmann d** | 1 | 0.04 | 0.01 | 0.02 |
| **luck sj** | 2 | 103.13 | 0.02 | 0.02 |
| **polich j** | 2 | 95.38 | 0.02 | 0.02 |
| **kutas m** | 2 | 14.24 | 0.02 | 0.02 |
| **lopezcalderon j** | 2 | 33.02 | 0.02 | 0.02 |
| **cavanagh jf** | 2 | 84.35 | 0.02 | 0.02 |
| **eimer m** | 2 | 16.71 | 0.02 | 0.02 |
| **debener s** | 2 | 49.67 | 0.02 | 0.02 |
| **picton tw** | 2 | 25.94 | 0.02 | 0.02 |
| **dien j** | 2 | 9.49 | 0.02 | 0.02 |
| **dehaene s** | 2 | 17.21 | 0.02 | 0.02 |
| **hillyard sa** | 2 | 16.38 | 0.02 | 0.02 |
| **hajcak g** | 3 | 9.87 | 0.02 | 0.02 |
| **holroyd cb** | 3 | 9.29 | 0.02 | 0.02 |
| **nieuwenhuis s** | 3 | 17.39 | 0.02 | 0.02 |
| **yeung n** | 3 | 14.11 | 0.02 | 0.02 |
| **falkenstein m** | 3 | 7.75 | 0.02 | 0.02 |
| **gehring wj** | 3 | 9.22 | 0.02 | 0.02 |

## Co-Citation Network for Sources


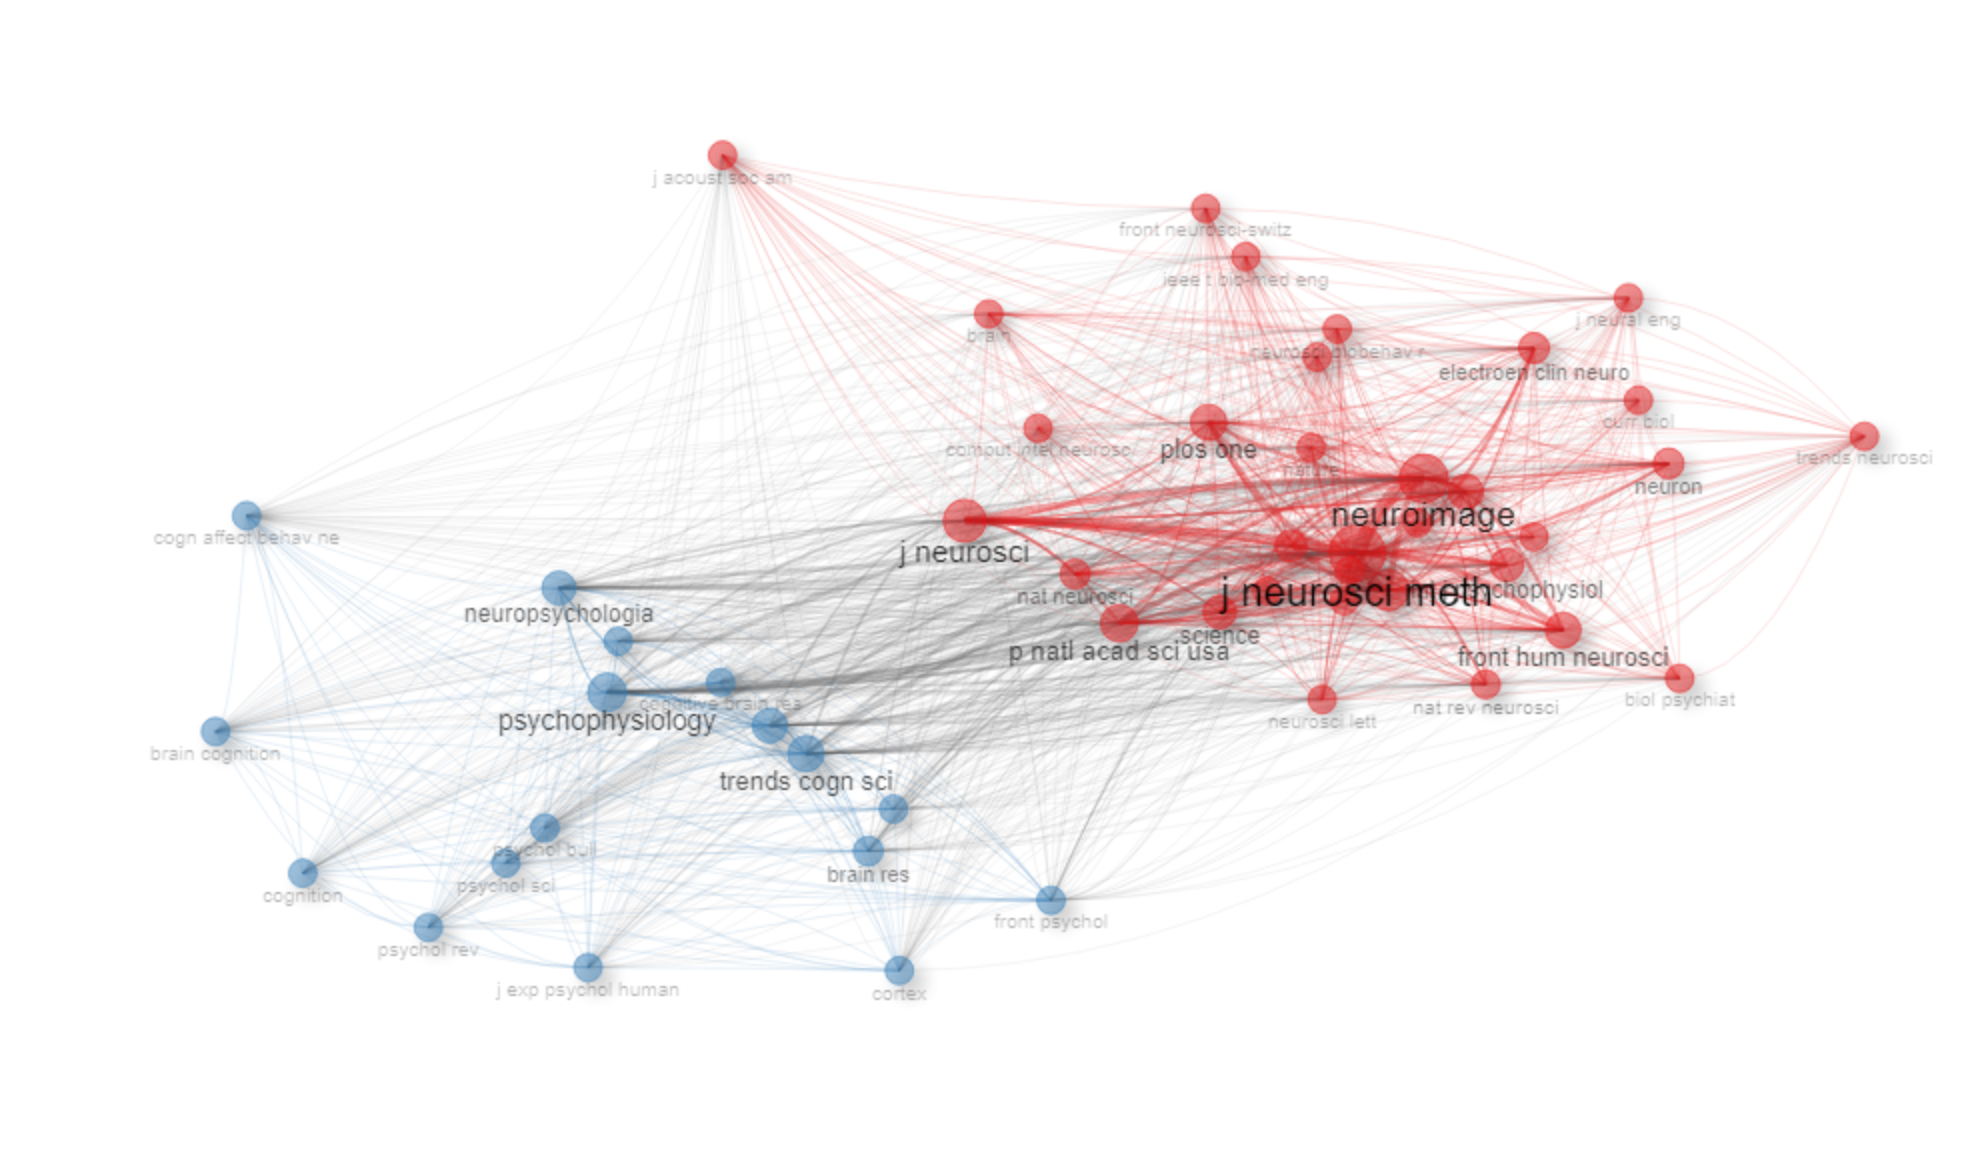


| **Node** | **Cluster** | **Betweenness** | **Closeness** | **PageRank** |
| --- | --- | --- | --- | --- |
| **neuroimage** | 1 | 14.94 | 0.01 | 0.02 |
| **j neurosci** | 1 | 10.19 | 0.01 | 0.02 |
| **clin neurophysiol** | 1 | 8.45 | 0.01 | 0.02 |
| **j neurosci meth** | 1 | 21.80 | 0.01 | 0.02 |
| **p natl acad sci usa** | 1 | 6.92 | 0.01 | 0.02 |
| **front hum neurosci** | 1 | 7.30 | 0.01 | 0.02 |
| **plos one** | 1 | 6.44 | 0.01 | 0.02 |
| **int j psychophysiol** | 1 | 6.20 | 0.01 | 0.02 |
| **cereb cortex** | 1 | 6.41 | 0.01 | 0.02 |
| **neuron** | 1 | 3.53 | 0.01 | 0.02 |
| **electroen clin neuro** | 1 | 3.90 | 0.01 | 0.02 |
| **hum brain mapp** | 1 | 3.98 | 0.01 | 0.02 |
| **science** | 1 | 5.54 | 0.01 | 0.02 |
| **j neurophysiol** | 1 | 2.18 | 0.01 | 0.02 |
| **nat neurosci** | 1 | 3.87 | 0.01 | 0.02 |
| **nat rev neurosci** | 1 | 3.05 | 0.01 | 0.02 |
| **nature** | 1 | 2.74 | 0.01 | 0.02 |
| **brain** | 1 | 1.31 | 0.01 | 0.02 |
| **neurosci lett** | 1 | 2.76 | 0.01 | 0.02 |
| **neurosci biobehav r** | 1 | 2.79 | 0.01 | 0.02 |
| **eur j neurosci** | 1 | 2.32 | 0.01 | 0.02 |
| **exp brain res** | 1 | 1.59 | 0.01 | 0.02 |
| **sci rep-uk** | 1 | 1.50 | 0.01 | 0.02 |
| **biol psychiat** | 1 | 0.68 | 0.01 | 0.02 |
| **ieee t bio-med eng** | 1 | 0.23 | 0.01 | 0.02 |
| **j neural eng** | 1 | 0.13 | 0.01 | 0.02 |
| **curr biol** | 1 | 1.26 | 0.01 | 0.02 |
| **front neurosci-switz** | 1 | 0.67 | 0.01 | 0.02 |
| **brain topogr** | 1 | 0.83 | 0.01 | 0.02 |
| **neuroscience** | 1 | 0.78 | 0.01 | 0.02 |
| **comput intel neurosc** | 1 | 0.80 | 0.01 | 0.02 |
| **trends neurosci** | 1 | 0.75 | 0.01 | 0.02 |
| **j acoust soc am** | 1 | 0.14 | 0.01 | 0.02 |
| **psychophysiology** | 2 | 94.13 | 0.02 | 0.02 |
| **j cognitive neurosci** | 2 | 66.38 | 0.02 | 0.02 |
| **trends cogn sci** | 2 | 82.51 | 0.02 | 0.02 |
| **neuropsychologia** | 2 | 61.93 | 0.02 | 0.02 |
| **biol psychol** | 2 | 28.06 | 0.02 | 0.02 |
| **brain res** | 2 | 44.04 | 0.02 | 0.02 |
| **front psychol** | 2 | 33.60 | 0.02 | 0.02 |
| **neuroreport** | 2 | 30.24 | 0.02 | 0.02 |
| **cognitive brain res** | 2 | 18.17 | 0.02 | 0.02 |
| **psychol sci** | 2 | 11.76 | 0.02 | 0.02 |
| **j exp psychol human** | 2 | 6.77 | 0.02 | 0.02 |
| **psychol rev** | 2 | 7.83 | 0.02 | 0.02 |
| **cortex** | 2 | 11.86 | 0.02 | 0.02 |
| **brain cognition** | 2 | 10.24 | 0.02 | 0.02 |
| **psychol bull** | 2 | 8.85 | 0.02 | 0.02 |
| **cogn affect behav ne** | 2 | 6.74 | 0.02 | 0.02 |
| **cognition** | 2 | 4.89 | 0.02 | 0.02 |

## Historiograph


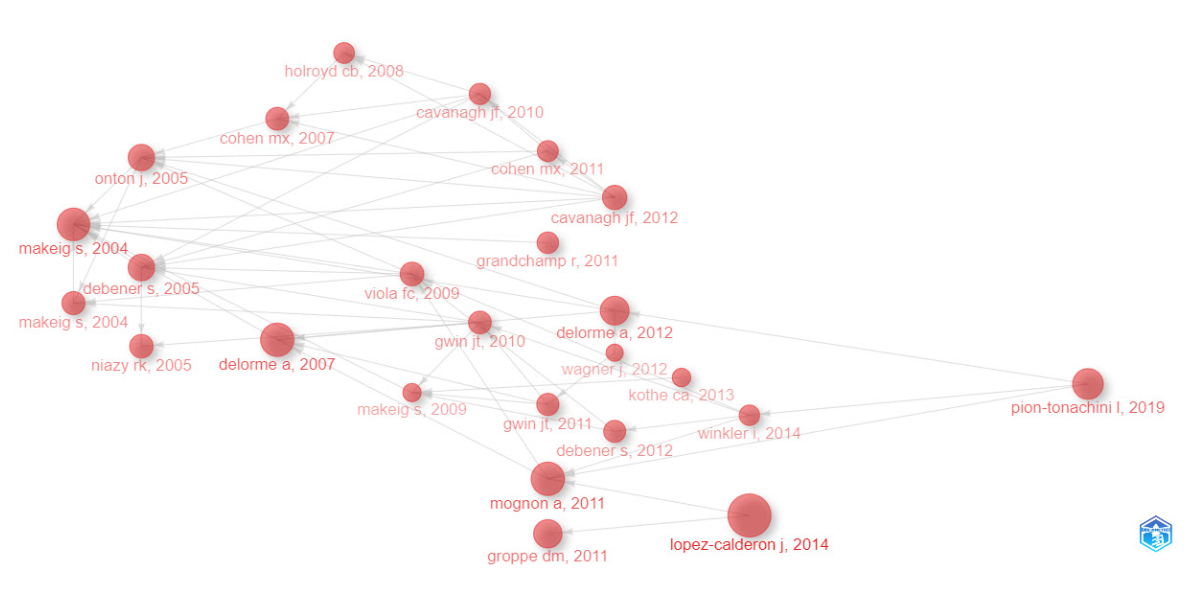


# Collaboration Network

## University


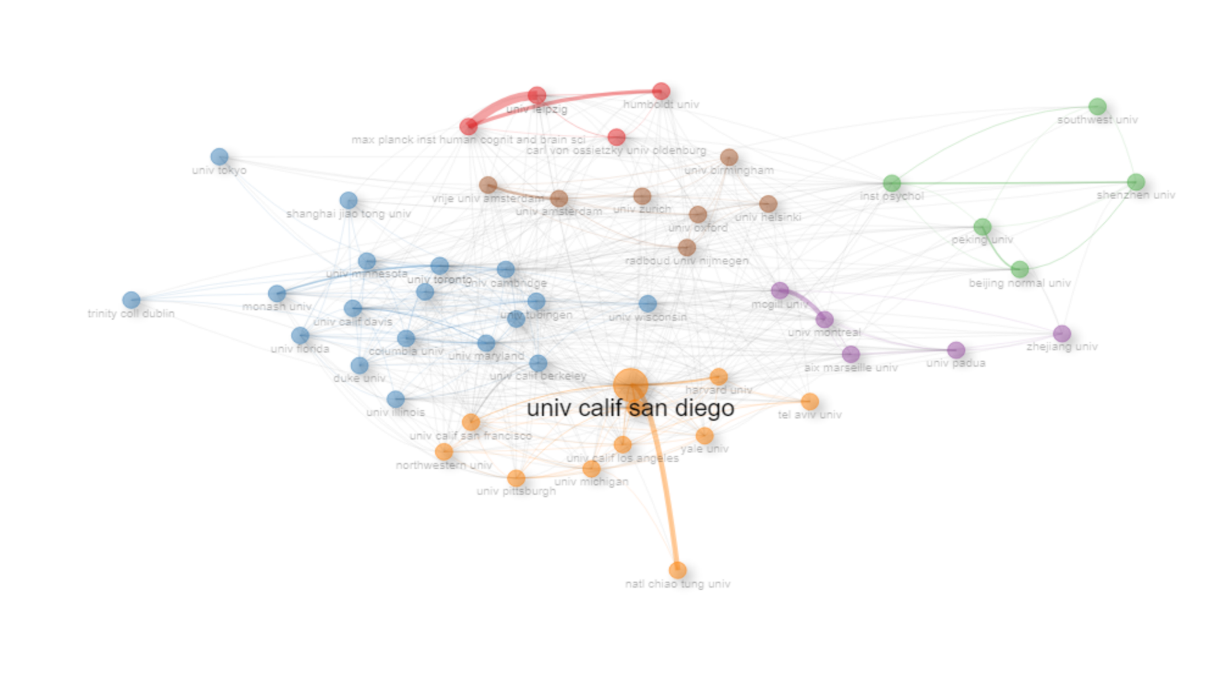


| **Node** | **Cluster** | **Betweenness** | **Closeness** | **PageRank** |
| --- | --- | --- | --- | --- |
| carl von ossietzky univ oldenburg | 1 | 8.847 | 0.013 | 0.021 |
| univ leipzig | 1 | 15.266 | 0.012 | 0.034 |
| humboldt univ | 1 | 7.208 | 0.012 | 0.022 |
| max planck inst human cognit and brain sci | 1 | 9.405 | 0.012 | 0.028 |
| univ toronto | 2 | 35.346 | 0.015 | 0.033 |
| univ calif davis | 2 | 12.598 | 0.013 | 0.023 |
| univ maryland | 2 | 24.910 | 0.014 | 0.027 |
| univ cambridge | 2 | 46.970 | 0.015 | 0.026 |
| univ wisconsin | 2 | 10.114 | 0.013 | 0.013 |
| univ illinois | 2 | 5.910 | 0.013 | 0.015 |
| univ tubingen | 2 | 11.923 | 0.014 | 0.018 |
| monash univ | 2 | 6.788 | 0.013 | 0.018 |
| univ minnesota | 2 | 7.962 | 0.013 | 0.013 |
| univ british columbia | 2 | 9.327 | 0.013 | 0.014 |
| trinity coll dublin | 2 | 0.938 | 0.011 | 0.012 |
| univ calif berkeley | 2 | 13.283 | 0.014 | 0.023 |
| columbia univ | 2 | 9.497 | 0.014 | 0.018 |
| univ florida | 2 | 9.427 | 0.013 | 0.016 |
| shanghai jiao tong univ | 2 | 5.139 | 0.011 | 0.011 |
| vanderbilt univ | 2 | 10.402 | 0.014 | 0.016 |
| univ tokyo | 2 | 0.274 | 0.011 | 0.006 |
| duke univ | 2 | 1.686 | 0.013 | 0.010 |
| beijing normal univ | 3 | 7.558 | 0.012 | 0.020 |
| southwest univ | 3 | 1.238 | 0.011 | 0.011 |
| inst psychol | 3 | 43.353 | 0.014 | 0.028 |
| peking univ | 3 | 11.093 | 0.012 | 0.017 |
| shenzhen univ | 3 | 4.932 | 0.011 | 0.017 |
| univ padua | 4 | 3.976 | 0.012 | 0.012 |
| mcgill univ | 4 | 30.761 | 0.014 | 0.028 |
| aix marseille univ | 4 | 11.549 | 0.013 | 0.017 |
| zhejiang univ | 4 | 3.795 | 0.011 | 0.009 |
| univ montreal | 4 | 5.616 | 0.013 | 0.021 |
| univ calif san diego | 5 | 105.113 | 0.016 | 0.059 |
| harvard med sch | 5 | 41.910 | 0.015 | 0.035 |
| univ pittsburgh | 5 | 3.296 | 0.013 | 0.019 |
| northwestern univ | 5 | 4.533 | 0.013 | 0.013 |
| tel aviv univ | 5 | 3.131 | 0.012 | 0.012 |
| univ michigan | 5 | 12.938 | 0.013 | 0.019 |
| univ calif los angeles | 5 | 12.529 | 0.013 | 0.025 |
| univ calif san francisco | 5 | 19.122 | 0.013 | 0.030 |
| natl chiao tung univ | 5 | 0.000 | 0.010 | 0.012 |
| yale univ | 5 | 11.421 | 0.013 | 0.022 |
| harvard univ | 5 | 16.480 | 0.013 | 0.022 |
| univ zurich | 6 | 11.390 | 0.013 | 0.017 |
| univ helsinki | 6 | 4.256 | 0.013 | 0.011 |
| univ oxford | 6 | 15.102 | 0.013 | 0.017 |
| radboud univ nijmegen | 6 | 46.328 | 0.015 | 0.027 |
| univ amsterdam | 6 | 24.740 | 0.014 | 0.025 |
| vrije univ amsterdam | 6 | 8.220 | 0.013 | 0.018 |
| univ birmingham | 6 | 14.400 | 0.013 | 0.018 |

## Countries


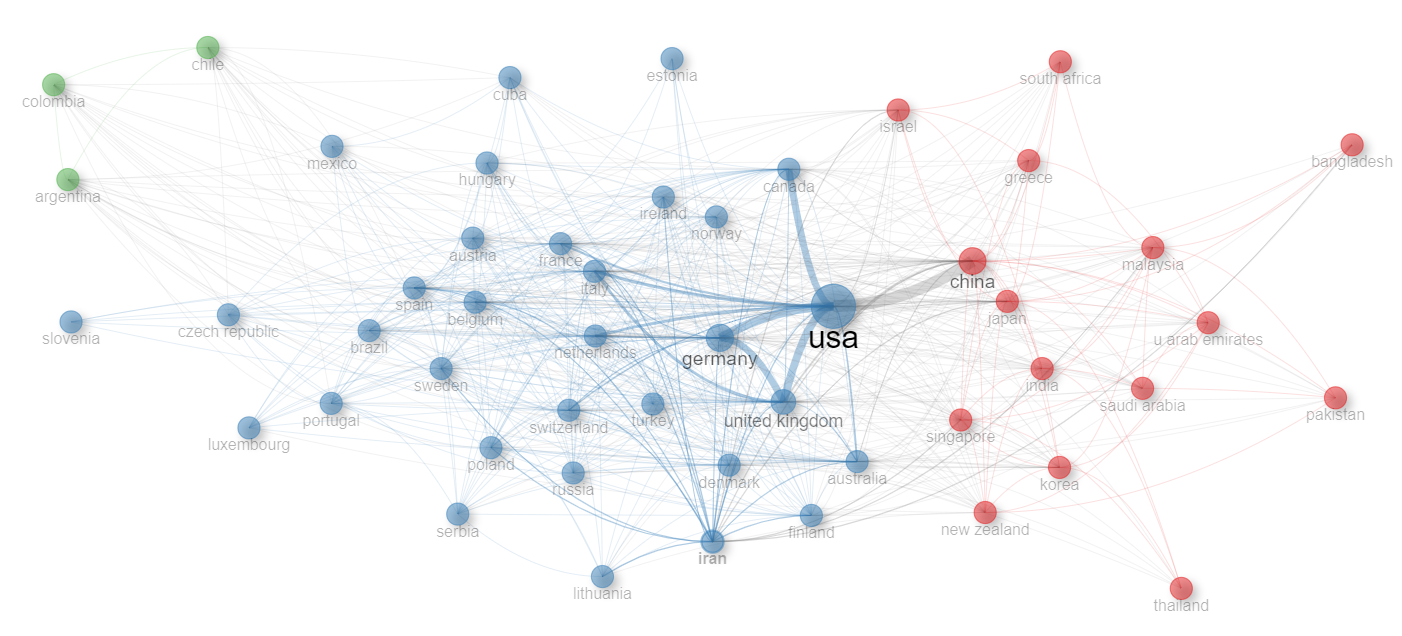


| **Node** | **Cluster** | **Betweenness** | **Closeness** | **PageRank** |
| --- | --- | --- | --- | --- |
| china | 1 | 17.307 | 0.017 | 0.058 |
| japan | 1 | 3.671 | 0.016 | 0.016 |
| korea | 1 | 0.214 | 0.014 | 0.010 |
| israel | 1 | 0.079 | 0.014 | 0.011 |
| india | 1 | 0.187 | 0.013 | 0.008 |
| greece | 1 | 0.070 | 0.013 | 0.009 |
| singapore | 1 | 1.463 | 0.015 | 0.012 |
| new zealand | 1 | 0.653 | 0.013 | 0.008 |
| malaysia | 1 | 1.194 | 0.013 | 0.007 |
| u arab emirates | 1 | 0.287 | 0.012 | 0.006 |
| thailand | 1 | 0.008 | 0.011 | 0.004 |
| south africa | 1 | 0.015 | 0.012 | 0.006 |
| saudi arabia | 1 | 0.349 | 0.013 | 0.006 |
| pakistan | 1 | 0.073 | 0.011 | 0.004 |
| bangladesh | 1 | 0.000 | 0.011 | 0.004 |
| usa | 2 | 271.438 | 0.020 | 0.141 |
| germany | 2 | 80.215 | 0.019 | 0.086 |
| united kingdom | 2 | 103.458 | 0.020 | 0.089 |
| canada | 2 | 3.747 | 0.017 | 0.043 |
| italy | 2 | 19.488 | 0.019 | 0.051 |
| france | 2 | 7.652 | 0.018 | 0.035 |
| australia | 2 | 16.212 | 0.018 | 0.040 |
| netherlands | 2 | 8.316 | 0.018 | 0.040 |
| spain | 2 | 9.419 | 0.017 | 0.028 |
| switzerland | 2 | 8.467 | 0.017 | 0.032 |
| belgium | 2 | 3.633 | 0.017 | 0.025 |
| finland | 2 | 2.329 | 0.015 | 0.018 |
| denmark | 2 | 6.208 | 0.015 | 0.017 |
| iran | 2 | 0.330 | 0.013 | 0.009 |
| brazil | 2 | 0.884 | 0.014 | 0.011 |
| norway | 2 | 0.692 | 0.014 | 0.013 |
| hungary | 2 | 0.104 | 0.013 | 0.009 |
| ireland | 2 | 0.976 | 0.015 | 0.014 |
| poland | 2 | 0.804 | 0.014 | 0.009 |
| austria | 2 | 0.748 | 0.015 | 0.014 |
| portugal | 2 | 0.313 | 0.013 | 0.008 |
| russia | 2 | 0.482 | 0.014 | 0.010 |
| sweden | 2 | 1.122 | 0.016 | 0.015 |
| turkey | 2 | 0.009 | 0.013 | 0.006 |
| czech republic | 2 | 0.020 | 0.012 | 0.005 |
| lithuania | 2 | 0.102 | 0.012 | 0.005 |
| mexico | 2 | 0.023 | 0.012 | 0.004 |
| slovenia | 2 | 0.000 | 0.011 | 0.004 |
| estonia | 2 | 0.000 | 0.011 | 0.004 |
| serbia | 2 | 0.284 | 0.012 | 0.005 |
| cuba | 2 | 0.061 | 0.012 | 0.005 |
| luxembourg | 2 | 0.002 | 0.012 | 0.004 |
| chile | 3 | 0.265 | 0.013 | 0.014 |
| argentina | 3 | 0.418 | 0.013 | 0.011 |
| colombia | 3 | 0.212 | 0.013 | 0.008 |

# Countries Collaboration Network


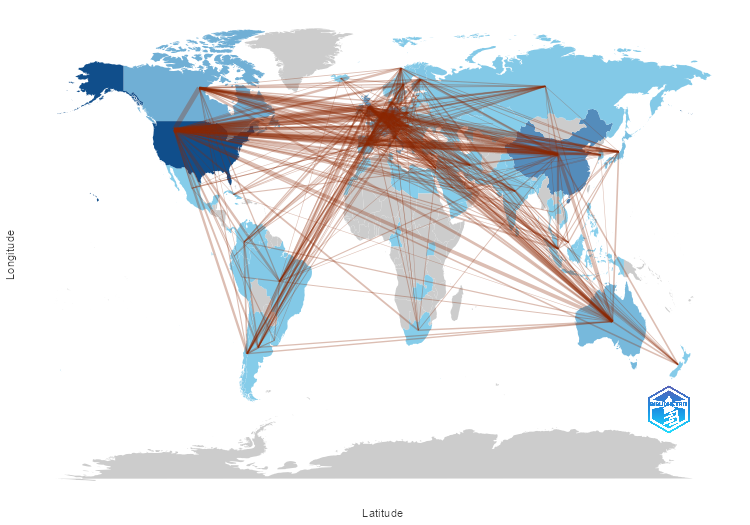


**References**

1. Marx, W., et al., *Detecting the historical roots of research fields by reference publication year spectroscopy (RPYS).* Journal of the Association for Information Science and Technology, 2014. **65**(4): p. 751-764.

2. Delorme, A. and S. Makeig, *EEGLAB: an open source toolbox for analysis of single-trial EEG dynamics including independent component analysis.* Journal of neuroscience methods, 2004. **134**(1): p. 9-21.
